# Supplementary material
Source: PubMed Central journal article supplement (PMC5035896)
Supplement: pnas.1607493113.sd01.pdf [file pnas.1607493113.sd01.pdf]

Dataset S1. List of taxa included in phylogeny with voucher information and GenBank accession numbers.

**Numbers in bold are newly generated sequences in this study.**

| Taxon Author                                                             | Order        | Family APG     | Genbank <i>rbcL</i> | Genbank <i>matK</i> |
|--------------------------------------------------------------------------|--------------|----------------|---------------------|---------------------|
| <i>Abutilon angulatum</i> (Guill. & Perr.) Mast.                         | Malvales     | Malvaceae      | JX572177            | JX517944            |
| <i>Abutilon sonneratianum</i> (Cav.) Sweet                               | Malvales     | Malvaceae      | JX572178            | JX518201            |
| <i>Acalypha chirindica</i> S.Moore                                       | Malpighiales | Euphorbiaceae  | JX572236            | JX518178            |
| <i>Acalypha glabrata</i> f. <i>pilosior</i> (Kuntze) Prain & Hutch.      | Malpighiales | Euphorbiaceae  | JX572238            | JX518120            |
| <i>Acalypha glabrata</i> Thunb.                                          | Malpighiales | Euphorbiaceae  | JX572237            | JX517655            |
| <i>Acokanthera oblongifolia</i> (Hochst.) Benth. & Hook.f. ex B.D.Jacks. | Gentianales  | Apocynaceae    | JX572239            | JX517911            |
| <i>Acokanthera oppositifolia</i> (Lam.) Codd                             | Gentianales  | Apocynaceae    | JX572240            | JX517680            |
| <i>Acokanthera rotundata</i> (Codd) Kupicha                              | Gentianales  | Apocynaceae    | JF265266            | JF270623            |
| <i>Acridocarpus chloropterus</i> Oliv.                                   | Malpighiales | Malpighiaceae  | <b>KU568077</b>     | <b>KX146299</b>     |
| <i>Acridocarpus natalitius</i> A.Juss.                                   | Malpighiales | Malpighiaceae  | JF265267            | JF270624            |
| <i>Adansonia digitata</i> L.                                             | Malvales     | Malvaceae      | JQ025018            | JQ024933            |
| <i>Adenia fruticosa</i> Burt Davy                                        | Malpighiales | Passifloraceae | JX572241            | JX905957            |
| <i>Adenia gummifera</i> (Harv.) Harms                                    | Malpighiales | Passifloraceae | JX572242            | JX517347            |
| <i>Adenia spinosa</i> Burt Davy                                          | Malpighiales | Passifloraceae | JF265269            | JX905950            |
| <i>Adenium multiflorum</i> Klotzsch                                      | Gentianales  | Apocynaceae    | JX572243            | JX517509            |
| <i>Adenium swazicum</i> Stapf                                            | Gentianales  | Apocynaceae    | JX572244            | JX517457            |
| <i>Adenopodia spicata</i> (E.Mey.) C.Presl                               | Fabales      | Fabaceae       | JX572245            | JX517808            |
| <i>Afrocanthium lactescens</i> (Hiern) Lantz                             | Gentianales  | Rubiaceae      | -                   | HM119502            |
| <i>Afrocanthium mundianum</i> (Cham. & Schldl.) Lantz                    | Gentianales  | Rubiaceae      | JX572367            | JX517319            |
| <i>Afrocanthium racemosum</i> (S.Moore) Lantz                            | Gentianales  | Rubiaceae      | JX572246            | JX517417            |
| <i>Afrocarpus falcatus</i> (Thunb.) C.N.Page                             | Pinales      | Podocarpaceae  | AF249589            | AF457111            |
| <i>Afzelia bella</i> Harms                                               | Fabales      | Fabaceae       | KC628648            | KC627920            |
| <i>Afzelia quanzensis</i> Welw.                                          | Fabales      | Fabaceae       | JX572247            | JX518045            |
| <i>Alafia caudata</i> Stapf                                              | Gentianales  | Apocynaceae    | <b>KU568015</b>     | <b>KX146243</b>     |
| <i>Alangium chinense</i> (Lour.) Harms                                   | Cornales     | Cornaceae      | L11209.2            | JF308671            |
| <i>Alberta magna</i> E.Mey.                                              | Gentianales  | Rubiaceae      | JX572251            | JX517760            |
| <i>Albizia adianthifolia</i> (Schum.) W.Wight                            | Fabales      | Fabaceae       | JX572252            | JX518130            |
| <i>Albizia amara</i> subsp. <i>sericocephala</i> (Benth.) Brenan         | Fabales      | Fabaceae       | JX572253            | JX517531            |
| <i>Albizia anthelmintica</i> Brongn.                                     | Fabales      | Fabaceae       | JX572254            | JX517977            |
| <i>Albizia brevifolia</i> Schinz                                         | Fabales      | Fabaceae       | JF265276            | JF270632            |
| <i>Albizia forbesii</i> Benth.                                           | Fabales      | Fabaceae       | JX572255            | JX517431            |
| <i>Albizia glaberrima</i> (Schum. & Thonn.) Benth.                       | Fabales      | Fabaceae       | JX572256            | JX518104            |
| <i>Albizia gummifera</i> (J.F.Gmel.) C.A.Sm.                             | Fabales      | Fabaceae       | <b>KU568132</b>     | <b>KX146347</b>     |
| <i>Albizia harveyi</i> E.Fourn.                                          | Fabales      | Fabaceae       | JX572257            | JX518176            |
| <i>Albizia petersiana</i> subsp. <i>evansii</i> (Burt Davy) Brenan       | Fabales      | Fabaceae       | JX572258            | JX517499            |
| <i>Albizia schimperiana</i> Oliv.                                        | Fabales      | Fabaceae       | <b>KU568034</b>     | <b>KX146259</b>     |
| <i>Albizia suluensis</i> Gerstner                                        | Fabales      | Fabaceae       | JX572259            | JX517858            |
| <i>Albizia tanganyicensis</i> Baker f.                                   | Fabales      | Fabaceae       | JF265280            | JF270636            |
| <i>Albizia versicolor</i> Oliv.                                          | Fabales      | Fabaceae       | JX572260            | JX518194            |

|                                                                         |              |                  |                 |                 |
|-------------------------------------------------------------------------|--------------|------------------|-----------------|-----------------|
| <i>Albizia zimmermannii</i> Harms                                       | Fabales      | Fabaceae         | JX572261        | JX517424        |
| <i>Alchornea hirtella</i> f. <i>glabrata</i> (Müll.Arg.) Pax & K.Hoffm. | Malpighiales | Euphorbiaceae    | JX572262        | JX518052        |
| <i>Alchornea laxiflora</i> (Benth.) Pax & K.Hoffm.                      | Malpighiales | Euphorbiaceae    | JX572263        | JX517659        |
| <i>Allocassine laurifolia</i> (Harv.) N.Robson                          | Celastrales  | Celastraceae     | JX572264        | JX517481        |
| <i>Allophylus africanus</i> P.Beauv.                                    | Sapindales   | Sapindaceae      | JX572265        | JX518006        |
| <i>Allophylus decipiens</i> (E.Mey.) Radlk.                             | Sapindales   | Sapindaceae      | JF265283        | JF270639        |
| <i>Allophylus dregeanus</i> (Sond.) De Winter                           | Sapindales   | Sapindaceae      | JX572266        | JX518230        |
| <i>Allophylus megaphyllus</i> Hutch. & Dalziel                          | Sapindales   | Sapindaceae      | KC628137        | KC627539        |
| <i>Allophylus natalensis</i> (Sond.) De Winter                          | Sapindales   | Sapindaceae      | -               | JX905946        |
| <i>Allophylus rubifolius</i> (Hochst. ex A.Rich.) Engl.                 | Sapindales   | Sapindaceae      | JX572267        | JX517604        |
| <i>Aloe africana</i> Mill.                                              | Asparagales  | Xanthorrhoeaceae | JX572268        | JX518056        |
| <i>Aloe angelica</i> Pole-Evans                                         | Asparagales  | Xanthorrhoeaceae | -               | JQ024109        |
| <i>Aloe arborescens</i> Mill.                                           | Asparagales  | Xanthorrhoeaceae | JX572272        | JX518144        |
| <i>Aloe barberae</i> Dyer                                               | Asparagales  | Xanthorrhoeaceae | JX572274        | JX518237        |
| <i>Aloe castanea</i> Schönland                                          | Asparagales  | Xanthorrhoeaceae | -               | JQ024120        |
| <i>Aloe comosa</i> Marloth & A.Berger                                   | Asparagales  | Xanthorrhoeaceae | JQ024499        | JQ024124        |
| <i>Aloe dichotoma</i> Masson                                            | Asparagales  | Xanthorrhoeaceae | JQ024501        | JQ024126        |
| <i>Aloe dichotoma</i> subsp. <i>pillansii</i> (L.Guthrie) Zonn.         | Asparagales  | Xanthorrhoeaceae | JQ024502        | JQ024127        |
| <i>Aloe dichotoma</i> subsp. <i>ramosissima</i> (Pillans) Zonn.         | Asparagales  | Xanthorrhoeaceae | JQ024503        | JQ024128        |
| <i>Aloe excelsa</i> A.Berger                                            | Asparagales  | Xanthorrhoeaceae | JF265284        | JF270640        |
| <i>Aloe ferox</i> Mill.                                                 | Asparagales  | Xanthorrhoeaceae | JX572282        | JX518209        |
| <i>Aloe hexapetala</i> Salm-Dyck.                                       | Asparagales  | Xanthorrhoeaceae | JQ024515        | JQ024141        |
| <i>Aloe marlothii</i> A.Berger                                          | Asparagales  | Xanthorrhoeaceae | JF265285        | JF270641        |
| <i>Aloe plicatilis</i> (L.) Mill.                                       | Asparagales  | Xanthorrhoeaceae | JQ024531        | JQ024159        |
| <i>Aloe pluridens</i> Haw.                                              | Asparagales  | Xanthorrhoeaceae | JX572293        | JX518078        |
| <i>Aloe spicata</i> L.f.                                                | Asparagales  | Xanthorrhoeaceae | JF265286        | JF270642        |
| <i>Aloe thraskii</i> Baker                                              | Asparagales  | Xanthorrhoeaceae | JQ024542        | JQ024170        |
| <i>Aloe tongaensis</i> van Jaarsv.                                      | Asparagales  | Xanthorrhoeaceae | <b>KU568057</b> | <b>KX146280</b> |
| <i>Alstonia boonei</i> De Wild.                                         | Gentianales  | Apocynaceae      | KC628315        | KC627675        |
| <i>Amblygonocarpus andongensis</i> (Oliv.) Exell & Torre                | Fabales      | Fabaceae         | JX572301        | JX517615        |
| <i>Anastrabe integerrima</i> E.Mey. ex Benth.                           | Lamiales     | Scrophulariaceae | KF147454        | KF147376        |
| <i>Ancylobothrys capensis</i> (Oliv.) Pichon                            | Gentianales  | Apocynaceae      | JX572303        | JX517602        |
| <i>Ancylobothrys petersiana</i> (Klotzsch) Pierre                       | Gentianales  | Apocynaceae      | <b>KU568037</b> | -               |
| <i>Androstachys johnsonii</i> Prain                                     | Malpighiales | Euphorbiaceae    | <b>KU568071</b> | -               |
| <i>Anginon difforme</i> (L.) B.L.Burtt                                  | Apiales      | Apiaceae         | JX572304        | JX518113        |
| <i>Angylocalyx oligophyllus</i> (Baker) Baker f.                        | Fabales      | Fabaceae         | KC628265        | KC627637        |
| <i>Angylocalyx pynaertii</i> De Wild.                                   | Fabales      | Fabaceae         | KC628050        | KC627479        |
| <i>Anisophyllea boehmii</i> Engl.                                       | Cucurbitales | Anisophylleaceae | <b>KU568153</b> | <b>KX146368</b> |
| <i>Anisophyllea polyneura</i> Floret                                    | Cucurbitales | Anisophylleaceae | KC628223        | KC627610        |
| <i>Anisophyllea pomifera</i> Engl. & Brehmer                            | Cucurbitales | Anisophylleaceae | <b>KU568070</b> | <b>KX146293</b> |
| <i>Anisophyllea purpurascens</i> Hutch. & Dalziel                       | Cucurbitales | Anisophylleaceae | KC628576        | KC627868        |

|                                                                     |                 |                  |                 |                 |
|---------------------------------------------------------------------|-----------------|------------------|-----------------|-----------------|
| <i>Anisophyllea sororia</i> Pierre                                  | Cucurbitales    | Anisophylleaceae | KC628143        | KC627544        |
| <i>Anisotes formosissimus</i> (Klotzsch) Milne-Redh.                | Lamiales        | Acanthaceae      | JF265288        | JF270643        |
| <i>Annickia affinis</i> (Exell) Versteegh & Sosef                   | Magnoliales     | Annonaceae       | KC628034        | KC627470        |
| <i>Annona senegalensis</i> Pers.                                    | Magnoliales     | Annonaceae       | JX572305        | JX517836        |
| <i>Annona stenophylla</i> Engl. & Diels                             | Magnoliales     | Annonaceae       | <b>KU568002</b> | <b>KX146231</b> |
| <i>Anthocleista grandiflora</i> Gilg                                | Gentianales     | Gentianaceae     | JX572306        | JX518238        |
| <i>Anthonotha fragrans</i> (Baker f.) Exell & Hillc.                | Fabales         | Fabaceae         | KC628532        | -               |
| <i>Anthonotha lamprophylla</i> (Harms) J.Léonard                    | Fabales         | Fabaceae         | KC628160        | -               |
| <i>Anthonotha macrophylla</i> P.Beauv.                              | Fabales         | Fabaceae         | KC628044        | -               |
| <i>Antiaris toxicaria</i> var. <i>usambarensis</i> (Engl.) C.C.Berg | Rosales         | Moraceae         | <b>KU568097</b> | <b>KX146318</b> |
| <i>Antidesma venosum</i> E.Mey. ex Tul.                             | Malpighiales    | Euphorbiaceae    | -               | HQ415372        |
| <i>Antidesma vogelianum</i> Müll.Arg.                               | Malpighiales    | Phyllanthaceae   | KC628530        | -               |
| <i>Aorantho cladantha</i> (K.Schum.) Somers                         | Gentianales     | Rubiaceae        | KC627986        | KC627436        |
| <i>Aphloia theiformis</i> (Vahl) Benn.                              | Crossosomatales | Aphloiaceae      | JX572308        | JX518161        |
| <i>Apodytes dimidiata</i> E.Mey. ex Arn.                            | Icacinales      | Icacinaceae      | JX572309        | JX517375        |
| <i>Argomuelleria macrophylla</i> Pax                                | Malpighiales    | Euphorbiaceae    | AB267915        | AB268019        |
| <i>Artabotrys brachypetalus</i> Benth.                              | Magnoliales     | Annonaceae       | JX572311        | JX517688        |
| <i>Aspalathus linearis</i> (Burm.f.) R.Dahlgren                     | Fabales         | Fabaceae         | JX572312        | JX517437        |
| <i>Aspalathus pendula</i> R.Dahlgren                                | Fabales         | Fabaceae         | JX572313        | JX518088        |
| <i>Atalaya alata</i> (Sim) H.M.L.Forbes                             | Sapindales      | Sapindaceae      | AY724345        | AY724274        |
| <i>Atalaya natalensis</i> R.A.Dyer                                  | Sapindales      | Sapindaceae      | JX572315        | JX517838        |
| <i>Aulacocalyx caudata</i> (Hiern) Keay                             | Gentianales     | Rubiaceae        | KC628595        | KC627882        |
| <i>Aulacocalyx jasmminiflora</i> Hook.f.                            | Gentianales     | Rubiaceae        | KC628497        | KC627814        |
| <i>Aulacocalyx talbotii</i> (Wernham) Keay                          | Gentianales     | Rubiaceae        | KC628074        | KC627500        |
| <i>Avicennia marina</i> (Forssk.) Vierh.                            | Lamiales        | Acanthaceae      | JX572318        | JX518100        |
| <i>Azanza garckeana</i> (F.Hoffm.) Exell & Hillc.                   | Malvales        | Malvaceae        | JX572319        | JX517364        |
| <i>Azima tetracantha</i> Lam.                                       | Brassicales     | Salvadoraceae    | JX572320        | JX517351        |
| <i>Bachmannia woodii</i> (Oliv.) Gilg                               | Brassicales     | Capparaceae      | JX572321        | JX518041        |
| <i>Baikiaea plurijuga</i> Harms                                     | Fabales         | Fabaceae         | JX572322        | JX517704        |
| <i>Baissea myrtifolia</i> (Benth.) Pichon                           | Gentianales     | Apocynaceae      | <b>KU568094</b> | <b>KX146315</b> |
| <i>Balanites aegyptiaca</i> (L.) Delile                             | Zygophyllales   | Zygophyllaceae   | JX572323        | JX517722        |
| <i>Balanites maughamii</i> Sprague                                  | Zygophyllales   | Zygophyllaceae   | JX572324        | JX517309        |
| <i>Balanites pedicellaris</i> Mildbr. & Schltr.                     | Zygophyllales   | Zygophyllaceae   | JF265297        | JF270651        |
| <i>Baphia laurifolia</i> Baill.                                     | Fabales         | Fabaceae         | -               | KC685076        |
| <i>Baphia massaiensis</i> subsp. <i>obovata</i> (Schinz) Brummitt   | Fabales         | Fabaceae         | JF265298        | JF270652        |
| <i>Baphia racemosa</i> (Hochst.) Baker                              | Fabales         | Fabaceae         | -               | JX517582        |
| <i>Barleria albostellata</i> C.B.Clarke                             | Lamiales        | Acanthaceae      | JF265299        | JF270653        |
| <i>Barleria rotundifolia</i> Oberm.                                 | Lamiales        | Acanthaceae      | JF265300        | JF270654        |
| <i>Barringtonia racemosa</i> (L.) Spreng.                           | Ericales        | Lecythidaceae    | JX572325        | JX517528        |
| <i>Barteria fistulosa</i> Mast.                                     | Malpighiales    | Passifloraceae   | KC628195        | KC627587        |
| <i>Bauhinia galpinii</i> N.E.Br.                                    | Fabales         | Fabaceae         | EU361875        | AM234262        |
| <i>Bauhinia glauca</i> (Benth.) Benth.                              | Fabales         | Fabaceae         | <b>KU568008</b> | <b>KX146237</b> |

|                                                                                          |              |                  |                 |                 |
|------------------------------------------------------------------------------------------|--------------|------------------|-----------------|-----------------|
| <i>Bauhinia mendoncae</i> Torre & Hillc.                                                 | Fabales      | Fabaceae         | <b>KU568168</b> | <b>KX146383</b> |
| <i>Bauhinia natalensis</i> Hook.                                                         | Fabales      | Fabaceae         | JX572326        | JX518033        |
| <i>Bauhinia petersiana</i> Bolle                                                         | Fabales      | Fabaceae         | JX572327        | JX517937        |
| <i>Bauhinia thonningii</i> Schum.                                                        | Fabales      | Fabaceae         | <b>KU568124</b> | -               |
| <i>Bauhinia tomentosa</i> L.                                                             | Fabales      | Fabaceae         | JX572328        | JX517621        |
| <i>Beilschmiedia acuta</i> Kosterm.                                                      | Lurales      | Lauraceae        | KC628468        | KC627796        |
| <i>Beilschmiedia jacques-felixii</i> Robyns & R.Wilczek                                  | Lurales      | Lauraceae        | KC627949        | KC627407        |
| <i>Belonophora talbotii</i> (Wernham) Keay                                               | Gentianales  | Rubiaceae        | KC628248        | KC627627        |
| <i>Belonophora wernhamii</i> Hutch. & Dalziel                                            | Gentianales  | Rubiaceae        | KC628302        | KC627667        |
| <i>Berchemia discolor</i> (Klotzsch) Hemsl.                                              | Rosales      | Rhamnaceae       | JX572329        | JX517834        |
| <i>Berchemia zeyheri</i> (Sond.) Grubov                                                  | Rosales      | Rhamnaceae       | JX572330        | JX517781        |
| <i>Berlinia auriculata</i> Benth.                                                        | Fabales      | Fabaceae         | KC628395        | KC627740        |
| <i>Berlinia hollandii</i> Hutch. & Dalziel                                               | Fabales      | Fabaceae         | KC628537        | KC627839        |
| <i>Berlinia orientalis</i> Brenan                                                        | Fabales      | Fabaceae         | <b>KU568136</b> | <b>KX146351</b> |
| <i>Bersama lucens</i> (Hochst.) Szyszyl.                                                 | Geraniales   | Melanthaceae     | JF265304        | JF270657        |
| <i>Bersama tysoniana</i> Oliv.                                                           | Geraniales   | Melanthaceae     | JX572331        | JX517517        |
| <i>Bertiera laxa</i> Benth.                                                              | Gentianales  | Rubiaceae        | -               | KC685079        |
| <i>Bertiera racemosa</i> (G.Don) K.Schum.                                                | Gentianales  | Rubiaceae        | KC628396        | KC627741        |
| <i>Berzelia lanuginosa</i> (L.) Brongn.                                                  | Bruniales    | Bruniaceae       | JX572332        | JX517959        |
| <i>Bivinia jalbertii</i> Tul.                                                            | Malpighiales | Salicaceae       | JX572333        | JX517831        |
| <i>Blighia unijugata</i> Baker                                                           | Sapindales   | Sapindaceae      | JX572334        | JX517638        |
| <i>Bobgunnia madagascariensis</i> (Desv.) J.H.Kirkbr. & Wiersema                         | Fabales      | Fabaceae         | JX572335        | JX518002        |
| <i>Bolusanthus speciosus</i> (Bolus) Harms                                               | Fabales      | Fabaceae         | JF265305        | JF270658        |
| <i>Boscia albitrunca</i> (Burch.) Gilg & Benedict                                        | Brassicales  | Capparaceae      | JX572338        | JX518051        |
| <i>Boscia angustifolia</i> var. <i>corymbosa</i> (Gilg) DeWolf                           | Brassicales  | Capparaceae      | -               | JX517529        |
| <i>Boscia foetida</i> Schinz                                                             | Brassicales  | Capparaceae      | JF265309        | JF270662        |
| <i>Boscia foetida</i> subsp. <i>filipes</i> (Gilg) Lötter.                               | Brassicales  | Capparaceae      | JX572339        | JX518084        |
| <i>Boscia mossambicensis</i> Klotzsch                                                    | Brassicales  | Capparaceae      | JX572340        | JX517670        |
| <i>Boscia salicifolia</i> Oliv.                                                          | Brassicales  | Capparaceae      | JX572341        | JX518071        |
| <i>Bosqueiopsis gillettii</i> De Wild. & T.Durand                                        | Rosales      | Moraceae         | <b>KU568112</b> | <b>KX146331</b> |
| <i>Bowkeria cymosa</i> MacOwan                                                           | Lamiales     | Scrophulariaceae | JX572342        | JX517768        |
| <i>Bowkeria verticillata</i> (Eckl. & Zeyh.) Druce                                       | Lamiales     | Scrophulariaceae | JX572343        | JX517524        |
| <i>Brabejum stellatifolium</i> L.                                                        | Proteales    | Proteaceae       | JX572344        | JX517823        |
| <i>Brachylaena discolor</i> DC.                                                          | Asterales    | Asteraceae       | JQ412332        | JQ412216        |
| <i>Brachylaena discolor</i> var. <i>transvaalensis</i> (E.Phillips & Schweick.) Beentje. | Asterales    | Asteraceae       | JF265312        | JF270665        |
| <i>Brachylaena elliptica</i> (Thunb.) Less.                                              | Asterales    | Asteraceae       | EU384952        | EU385330        |
| <i>Brachylaena huillensis</i> O.Hoffm.                                                   | Asterales    | Asteraceae       | JF265311        | JF270664        |
| <i>Brachylaena neriifolia</i> (L.) R.Br.                                                 | Asterales    | Asteraceae       | JX572345        | JX517590        |
| <i>Brachylaena rotundata</i> S.Moore                                                     | Asterales    | Asteraceae       | JX572346        | JX518142        |
| <i>Brachystegia allenii</i> Burt Davy & Hutch.                                           | Fabales      | Fabaceae         | <b>KU568100</b> | <b>KX146320</b> |
| <i>Brachystegia boehmii</i> Taub.                                                        | Fabales      | Fabaceae         | JX572347        | JX518131        |
| <i>Brachystegia bussei</i> Harms                                                         | Fabales      | Fabaceae         | -               | EU361887        |

|                                                                |              |                  |                 |                 |
|----------------------------------------------------------------|--------------|------------------|-----------------|-----------------|
| <i>Brachystegia floribunda</i> Benth.                          | Fabales      | Fabaceae         | <b>KU568148</b> | <b>KX146363</b> |
| <i>Brachystegia glaucescens</i> Burtt Davy & Hutch.            | Fabales      | Fabaceae         | <b>KU568088</b> | <b>KX146310</b> |
| <i>Brachystegia longifolia</i> Benth.                          | Fabales      | Fabaceae         | <b>KU568078</b> | <b>KX146300</b> |
| <i>Brachystegia stipulata</i> De Wild.                         | Fabales      | Fabaceae         | KF147455        | KF147378        |
| <i>Brackenridgea arenaria</i> (De Wild. & T.Durand) N.Robson   | Malpighiales | Ochnaceae        | <b>KU568023</b> | <b>KX146247</b> |
| <i>Brackenridgea zanguebarica</i> Oliv.                        | Malpighiales | Ochnaceae        | KF147456        | KF147379        |
| <i>Breonadia salicina</i> (Vahl) Hepper & J.R.I.Wood           | Gentianales  | Rubiaceae        | JX572348        | JX518162        |
| <i>Brexia madagascariensis</i> (Lam.) Thouars ex Ker Gawl.     | Celastrales  | Celastraceae     | JX572349        | JX517980        |
| <i>Bridelia atroviridis</i> Müll.Arg.                          | Malpighiales | Euphorbiaceae    | -               | FJ439961        |
| <i>Bridelia cathartica</i> Bertol.                             | Malpighiales | Euphorbiaceae    | JX572350        | JX517968        |
| <i>Bridelia micrantha</i> (Hochst.) Baill.                     | Malpighiales | Euphorbiaceae    | JF265315        | JF270668        |
| <i>Bridelia mollis</i> Hutch.                                  | Malpighiales | Euphorbiaceae    | JX572351        | JX518053        |
| <i>Bridelia tenuifolia</i> Müll.Arg.                           | Malpighiales | Euphorbiaceae    | -               | FJ439963        |
| <i>Bruguiera gymnorhiza</i> (L.) Lam.                          | Malpighiales | Rhizophoraceae   | JX905966        | AF105088        |
| <i>Brunia albifora</i> Phillips                                | Bruniales    | Bruniaceae       | JX572352        | JX517948        |
| <i>Buddleja dysophylla</i> (Benth.) Radlk.                     | Lamiales     | Scrophulariaceae | JX572353        | JX518066        |
| <i>Buddleja saligna</i> Willd.                                 | Lamiales     | Scrophulariaceae | JX572354        | JX518195        |
| <i>Buddleja salviifolia</i> (L.) Lam.                          | Lamiales     | Scrophulariaceae | JX572355        | JX517705        |
| <i>Burchellia bubalina</i> (L.f.) Sims                         | Gentianales  | Rubiaceae        | JX572356        | JX517467        |
| <i>Burkea africana</i> Hook.                                   | Fabales      | Fabaceae         | JX572357        | JX517992        |
| <i>Burttdavaya nyasica</i> Hoyle                               | Gentianales  | Rubiaceae        | JX572358        | JX517314        |
| <i>Buxus macowanii</i> Oliv.                                   | Buxales      | Buxaceae         | JX572359        | JX517876        |
| <i>Buxus natalensis</i> (Oliv.) Hutch.                         | Buxales      | Buxaceae         | JX572360        | JX517505        |
| <i>Cadaba aphylla</i> (Thunb.) Wild                            | Brassicales  | Capparaceae      | JX572361        | JX517921        |
| <i>Cadaba kirkii</i> Oliv.                                     | Brassicales  | Capparaceae      | JX572362        | JX517687        |
| <i>Cadaba termitaria</i> N.E.Br.                               | Brassicales  | Capparaceae      | JF265318        | JF270671        |
| <i>Caesalpinia angolensis</i> (Oliv.) Herend. & Zarucchi       | Fabales      | Fabaceae         | <b>KU568048</b> | <b>KX146271</b> |
| <i>Caesalpinia bonduc</i> (L.) Roxb.                           | Fabales      | Fabaceae         | -               | JX517899        |
| <i>Calodendrum capense</i> (L.f.) Thunb.                       | Sapindales   | Rutaceae         | JF265319        | JF270672        |
| <i>Calpocalyx dinklagei</i> Harms                              | Fabales      | Fabaceae         | KC628117        | KC627527        |
| <i>Calpurnia aurea</i> (Aiton) Benth.                          | Fabales      | Fabaceae         | JF265320        | JF270673        |
| <i>Calpurnia sericea</i> Harv.                                 | Fabales      | Fabaceae         | JX572364        | JX518205        |
| <i>Calycosiphonia macrochlamys</i> (K. Schum.) Robbr.          | Gentianales  | Rubiaceae        | KC628476        | KC627799        |
| <i>Campylospermum calanthum</i> (Gilg) Farron                  | Malpighiales | Ochnaceae        | KC628502        | -               |
| <i>Campylospermum flavum</i> (Schumach. & Thonn.) Farron       | Malpighiales | Ochnaceae        | KC628030        | -               |
| <i>Campylospermum laxiflorum</i> (De Wild. & T. Durand) Tiegh. | Malpighiales | Ochnaceae        | KC628040        | -               |
| <i>Campylospermum mannii</i> (Oliv.) Tiegh.                    | Malpighiales | Ochnaceae        | KC628518        | -               |
| <i>Campylospermum sulcatum</i> (Tiegh.) Farron                 | Malpighiales | Ochnaceae        | KC628125        | -               |
| <i>Canarium madagascariense</i> Engl.                          | Sapindales   | Burseraceae      | <b>KU568159</b> | <b>KX146374</b> |
| <i>Canthium armatum</i> (K.Schum.) Lantz                       | Gentianales  | Rubiaceae        | JX572859        | JX517643        |
| <i>Canthium ciliatum</i> (D.Dietr.) Kuntze                     | Gentianales  | Rubiaceae        | JX572365        | JX518137        |
| <i>Canthium inerme</i> (L.f.) Kuntze                           | Gentianales  | Rubiaceae        | JX572366        | JX517491        |

|                                                                 |              |                |                 |                 |
|-----------------------------------------------------------------|--------------|----------------|-----------------|-----------------|
| <i>Canthium setiflorum</i> Hiern                                | Gentianales  | Rubiaceae      | JX572368        | JX518042        |
| <i>Canthium spinosum</i> (Klotzsch ex Eckl. & Zeyh.) Kuntze     | Gentianales  | Rubiaceae      | JX572369        | JX517559        |
| <i>Canthium suberosum</i> Codd                                  | Gentianales  | Rubiaceae      | JX572370        | JX517637        |
| <i>Canthium vanwykii</i> Tilney & Kok                           | Gentianales  | Rubiaceae      | JX572371        | JX517690        |
| <i>Capparis erythrocarpos</i> Isert                             | Brassicales  | Capparaceae    | JX572372        | JX517706        |
| <i>Capparis fascicularis</i> DC.                                | Brassicales  | Capparaceae    | JF265323        | JF270676        |
| <i>Capparis sepiaria</i> L.                                     | Brassicales  | Capparaceae    | -               | <b>KX146264</b> |
| <i>Capparis sepiaria</i> var. <i>subglabra</i> (Oliv.) DeWolf   | Brassicales  | Capparaceae    | JX572373        | JX517328        |
| <i>Capparis tomentosa</i> Lam.                                  | Brassicales  | Capparaceae    | JX572374        | JX518213        |
| <i>Carapa procera</i> DC                                        | Sapindales   | Meliaceae      | KC628172        | KC627567        |
| <i>Carissa bispinosa</i> (L.) Desf. ex Brenan                   | Gentianales  | Apocynaceae    | JX572375        | JX518098        |
| <i>Carissa haematocarpa</i> (Eckl.) A.DC.                       | Gentianales  | Apocynaceae    | KF147457        | KF147380        |
| <i>Carissa macrocarpa</i> (Eckl.) A.DC.                         | Gentianales  | Apocynaceae    | JX572377        | JX517764        |
| <i>Carissa praetermissa</i> Kupicha                             | Gentianales  | Apocynaceae    | JX572378        | JX518202        |
| <i>Carissa spinarum</i> L.                                      | Gentianales  | Apocynaceae    | JX572376        | JX517623        |
| <i>Carissa tetramera</i> (Sacleux) Stapf                        | Gentianales  | Apocynaceae    | JX572379        | JX517545        |
| <i>Carpodiptera africana</i> Mast.                              | Malvales     | Malvaceae      | <b>KU568090</b> | <b>KX146312</b> |
| <i>Carpolobia goetzei</i> Gürke                                 | Fabales      | Polygalaceae   | JX572380        | JX517551        |
| <i>Carpolobia lutea</i> G.Don                                   | Fabales      | Polygalaceae   | KC628385        | KC627733        |
| <i>Casearia barteri</i> Mast.                                   | Malpighiales | Salicaceae     | KC628148        | KC627548        |
| <i>Casearia gladiiformis</i> Mast.                              | Malpighiales | Salicaceae     | JX572383        | JX517926        |
| <i>Casearia</i> sp. nov. Abbott                                 | Malpighiales | Salicaceae     | JX573112        | JX905955        |
| <i>Casearia</i> sp. nov. Burrows                                | Malpighiales | Salicaceae     | KF147458        | -               |
| <i>Cassia abbreviata</i> Oliv.                                  | Fabales      | Fabaceae       | JX572384        | JX517898        |
| <i>Cassia abbreviata</i> subsp. <i>beareana</i> (Holmes) Brenan | Fabales      | Fabaceae       | JX572385        | JX518172        |
| <i>Cassia afrodistula</i> Brenan                                | Fabales      | Fabaceae       | JX572386        | JX518010        |
| <i>Cassine aethiopica</i> Thunb.                                | Celastrales  | Celastraceae   | -               | DQ217534.1      |
| <i>Cassine crocea</i> (Thunb.) C.Presl.                         | Celastrales  | Celastraceae   | JX572546        | JX517420        |
| <i>Cassine matabelica</i> (Loes.) Steedman                      | Celastrales  | Celastraceae   | -               | DQ217537        |
| <i>Cassine peragua</i> L.                                       | Celastrales  | Celastraceae   | JX572387        | JX517718        |
| <i>Cassine reticulata</i> (Eckl. & Zeyh.) Codd                  | Celastrales  | Celastraceae   | -               | DQ217535        |
| <i>Cassine schinoides</i> (Spreng.) R.H.Archer                  | Celastrales  | Celastraceae   | -               | DQ217536        |
| <i>Cassine transvaalensis</i> (Burt Davy) Codd.                 | Celastrales  | Celastraceae   | JX572547        | JX517826        |
| <i>Cassinopsis ilicifolia</i> (Hochst.) Sleumer                 | Icacinales   | Icacinaceae    | JF265330        | JF270683        |
| <i>Cassinopsis tinifolia</i> Harv.                              | Icacinales   | Icacinaceae    | JX572388        | JX517588        |
| <i>Cassipourea gummiflua</i> Tul.                               | Malpighiales | Rhizophoraceae | JX572389        | JX517458        |
| <i>Cassipourea malosana</i> (Baker) Alston                      | Malpighiales | Rhizophoraceae | JX572390        | JX517355        |
| <i>Cassipourea sericea</i> Alston                               | Malpighiales | Rhizophoraceae | KC628079        | KC627505        |
| <i>Catha abbottii</i> A.E.van Wyk & M.Prins                     | Celastrales  | Celastraceae   | JX572741        | JX517339        |
| <i>Catha edulis</i> (Vahl) Endl.                                | Celastrales  | Celastraceae   | JX572392        | JX517954        |
| <i>Catunaregam obovata</i> (Hochst.) A.E.Gon.                   | Gentianales  | Rubiaceae      | JX572393        | JX517479        |
| <i>Catunaregam swynnertonii</i> (S.Moore) Bridson               | Gentianales  | Rubiaceae      | JX572394        | JX517530        |

|                                                                      |                |                  |                 |                 |
|----------------------------------------------------------------------|----------------|------------------|-----------------|-----------------|
| <i>Catunaregam taylorii</i> (S.Moore) Bridson                        | Gentianales    | Rubiaceae        | <b>KU568026</b> | <b>KX146250</b> |
| <i>Cavacoa aurea</i> (Cavaco) J.Léonard                              | Malpighiales   | Euphorbiaceae    | JX572395        | JX518036        |
| <i>Celtis africana</i> Burm.f.                                       | Rosales        | Ulmaceae         | JF265333        | JF270686        |
| <i>Celtis gomphophylla</i> Baker                                     | Rosales        | Ulmaceae         | JX572396        | JX517812        |
| <i>Celtis mildbraedii</i> Engl.                                      | Rosales        | Ulmaceae         | JX572397        | JX517381        |
| <i>Celtis philippensis</i> Blanco                                    | Rosales        | Ulmaceae         | <b>KU568004</b> | <b>KX146233</b> |
| <i>Cephalanthus natalensis</i> Oliv.                                 | Gentianales    | Rubiaceae        | JF265334        | JF270687        |
| <i>Ceraria fruticulosa</i> H.Pearson & Stephens                      | Caryophyllales | Portulacaceae    | AY875218        | AY875371        |
| <i>Ceriops tagal</i> (Perr.) C.B.Rob.                                | Malpighiales   | Rhizophoraceae   | AF006756        | AF105089        |
| <i>Chaetachme aristata</i> Planch.                                   | Rosales        | Ulmaceae         | JX572399        | JX517429        |
| <i>Chazaliella abrupta</i> (Hiern) E.M.A.Petit & Verdc.              | Gentianales    | Oleaceae         | JX572400        | JX518149        |
| <i>Chionanthus foveolatus</i> (E.Mey.) Stearn                        | Lamiales       | Oleaceae         | JF265336        | JF270689        |
| <i>Chionanthus peglerae</i> (C.H.Wright) Stearn                      | Lamiales       | Oleaceae         | JF265337        | JF270690        |
| <i>Chlamydocola chlamydantha</i> (K.Schum.) M.Bodard                 | Malvales       | Malvaceae        | KC628023        | KC627464        |
| <i>Chrysanthemoides monilifera</i> (L.) Norl.                        | Asterales      | Asteraceae       | JX572403        | JX517413        |
| <i>Chrysobalanus icaco</i> L.                                        | Malpighiales   | Chrysobalanaceae | KC628284        | KC627653        |
| <i>Chrysophyllum subnudum</i> Baker                                  | Ericales       | Sapotaceae       | KC628535        | -               |
| <i>Chrysophyllum viridifolium</i> J.M.Wood & Franks                  | Ericales       | Sapotaceae       | JX572404        | JX518108        |
| <i>Chytranthus talbotii</i> (Baker f.) Keay                          | Sapindales     | Sapindaceae      | KC628569        | KC627863        |
| <i>Cissus cactiformis</i> Gilg                                       | Vitales        | Vitaceae         | JX572405        | JX517930        |
| <i>Cissus cornifolia</i> (Baker) Planch.                             | Vitales        | Vitaceae         | JX572406        | JX517833        |
| <i>Cissus integrifolia</i> (Baker) Planch.                           | Vitales        | Vitaceae         | JX572407        | JX517840        |
| <i>Cladostemon kirkii</i> (Oliv.) Pax & Gilg                         | Brassicales    | Capparaceae      | JX572409        | JX517981        |
| <i>Clausena anisata</i> (Willd.) Hook.f. ex Benth.                   | Sapindales     | Rutaceae         | JX572410        | JX517957        |
| <i>Cleistanthus polystachyus</i> subsp. milleri (Dunkley) Radcl.-Sm. | Malpighiales   | Euphorbiaceae    | -               | FJ439971        |
| <i>Cleistanthus schlechteri</i> (Pax) Hutch.                         | Malpighiales   | Euphorbiaceae    | JX572411        | JX970903        |
| <i>Cleistochlamys kirkii</i> (Benth.) Oliv.                          | Magnoliales    | Annonaceae       | JX572412        | JX517486        |
| <i>Clematis brachiata</i> Thunb.                                     | Ranunculales   | Ranunculaceae    | JF265340        | JF270693        |
| <i>Clerodendrum buchneri</i> Gürke                                   | Lamiales       | Lamiaceae        | <b>KU568050</b> | <b>KX146273</b> |
| <i>Clerodendrum cephalanthum</i> Oliv.                               | Lamiales       | Lamiaceae        | <b>KU568049</b> | <b>KX146272</b> |
| <i>Clerodendrum eriophyllum</i> Gürke                                | Lamiales       | Lamiaceae        | JX572413        | JX517512        |
| <i>Clerodendrum frutectorum</i> S.Moore                              | Lamiales       | Lamiaceae        | <b>KU568144</b> | <b>KX146359</b> |
| <i>Clerodendrum glabrum</i> E.Mey.                                   | Lamiales       | Lamiaceae        | JX572414        | JX517832        |
| <i>Clerodendrum incisum</i> Klotzsch                                 | Lamiales       | Lamiaceae        | KF147459        | KF147381        |
| <i>Clerodendrum ternatum</i> Schinz                                  | Lamiales       | Lamiaceae        | KF147460        | KF147382        |
| <i>Cliffortia burchellii</i> Stapf                                   | Rosales        | Rosaceae         | KP110233        | KP110018        |
| <i>Cliffortia densa</i> Weim.                                        | Rosales        | Rosaceae         | KP110019        | KP110234        |
| <i>Cliffortia ferruginea</i> L.f.                                    | Rosales        | Rosaceae         | KP110235        | -               |
| <i>Cliffortia filicaulis</i> Cham. & Schtdl.                         | Rosales        | Rosaceae         | KP110236        | -               |
| <i>Cliffortia graminea</i> L.f.                                      | Rosales        | Rosaceae         | KM894269        | KM896939        |
| <i>Cliffortia heterophylla</i> Weim.                                 | Rosales        | Rosaceae         | KP110237        | KP110020        |
| <i>Cliffortia serpyllifolia</i> Cham. & Schtdl.                      | Rosales        | Rosaceae         | KP110238        | KP110021        |

|                                                                           |              |                |                 |                 |
|---------------------------------------------------------------------------|--------------|----------------|-----------------|-----------------|
| <i>Cliffortia stricta</i> Weim.                                           | Rosales      | Rosaceae       | KP110239        | KP110022        |
| <i>Cliffortia subsetacea</i> (Eckl. & Zeyh.) Diels ex Bolus & Wolley-Dod  | Rosales      | Rosaceae       | KP110240        | KP110023        |
| <i>Cliffortia triloba</i> Harv.                                           | Rosales      | Rosaceae       | KP110241        | -               |
| <i>Clutia abyssinica</i> Jaub. & Spach                                    | Malpighiales | Euphorbiaceae  | JX572415        | JX518174        |
| <i>Clutia Boerh.</i> sp. nov.                                             | Malpighiales | Euphorbiaceae  | JX572417        | JX517450        |
| <i>Clutia monticola</i> S.Moore                                           | Malpighiales | Euphorbiaceae  | KF147461        | -               |
| <i>Clutia pulchella</i> L.                                                | Malpighiales | Euphorbiaceae  | JX572416        | JX517825        |
| <i>Cnestis polyphylla</i> Lam.                                            | Oxalidales   | Connaraceae    | JX572418        | JX517860        |
| <i>Cocculus</i> DC.                                                       | Ranunculales | Menispermaceae | HQ260774        | EF143860        |
| <i>Coddia rudis</i> (E.Mey. ex Harv.) Verdc.                              | Gentianales  | Rubiaceae      | JX572419        | JX517674        |
| <i>Coelocaryon preussii</i> Warb.                                         | Magnoliales  | Myristicaceae  | -               | KC685082        |
| <i>Coffea arabica</i> L.                                                  | Gentianales  | Rubiaceae      | HM446782        | AM412456        |
| <i>Coffea ligustroides</i> S.Moore                                        | Gentianales  | Rubiaceae      | -               | JX517673        |
| <i>Coffea racemosa</i> Lour.                                              | Gentianales  | Rubiaceae      | JX572420        | JX517631        |
| <i>Coffea salvatrix</i> Swynn. & Philipson                                | Gentianales  | Rubiaceae      | JX572421        | JX517922        |
| <i>Coffea zanguebariae</i> Lour.                                          | Gentianales  | Rubiaceae      | <b>KU568009</b> | <b>KX146238</b> |
| <i>Cola acuminata</i> (P.Beauv.) Schott & Endl.                           | Malvales     | Malvaceae      | KC628069        | KC627496        |
| <i>Cola cauliflora</i> Mast.                                              | Malvales     | Malvaceae      | KC628461        | KC627790        |
| <i>Cola digitata</i> Mast.                                                | Malvales     | Malvaceae      | KC628162        | KC627559        |
| <i>Cola greenwayi</i> Brenan                                              | Malvales     | Malvaceae      | -               | JX517703        |
| <i>Cola lateritia</i> K.Schum.                                            | Malvales     | Malvaceae      | KC628142        | KC627543        |
| <i>Cola lepidota</i> K.Schum.                                             | Malvales     | Malvaceae      | KC628509        | KC627823        |
| <i>Cola mossambicensis</i> Wild                                           | Malvales     | Malvaceae      | JX572422        | JX517410        |
| <i>Cola natalensis</i> Oliv.                                              | Malvales     | Malvaceae      | JX572423        | JX518169        |
| <i>Cola praeacuta</i> Brenan & Keay                                       | Malvales     | Malvaceae      | KC628342        | KC627698        |
| <i>Cola rostrata</i> K.Schum.                                             | Malvales     | Malvaceae      | KC628381        | KC627729        |
| <i>Cola semecarpophylla</i> K.Schum.                                      | Malvales     | Malvaceae      | KC628120        | KC627530        |
| <i>Cola suboppositifolia</i> Cheek                                        | Malvales     | Malvaceae      | KC628548        | KC627848        |
| <i>Cola verticillata</i> (Thonn.) Stapf ex A.Chev.                        | Malvales     | Malvaceae      | KC628413        | KC627754        |
| <i>Coleonema album</i> (Thunb.) Bartl. & H.L.Wendl.                       | Sapindales   | Rutaceae       | JX572424        | JX517370        |
| <i>Colophospermum mopane</i> (Benth.) Leonard                             | Fabales      | Fabaceae       | JX572425        | JX517743        |
| <i>Colubrina asiatica</i> (L.) Brongn.                                    | Rosales      | Rhamnaceae     | GU135186        | GU135023        |
| <i>Combretum adenogonium</i> Steud. ex A.Rich.                            | Myrtales     | Combretaceae   | EU338151        | JX517478        |
| <i>Combretum albopunctatum</i> Suess.                                     | Myrtales     | Combretaceae   | JX572427        | JX517725        |
| <i>Combretum apiculatum</i> Sond.                                         | Myrtales     | Combretaceae   | JX572429        | JX517366        |
| <i>Combretum apiculatum</i> subsp. <i>leutweinii</i> (Schinz) Exell       | Myrtales     | Combretaceae   | JX572428        | JX517678        |
| <i>Combretum bracteosum</i> (Hochst.) Engl. & Diels                       | Myrtales     | Combretaceae   | JX572430        | JX517513        |
| <i>Combretum caffrum</i> (Eckl. & Zeyh.) Kuntze                           | Myrtales     | Combretaceae   | JX572431        | JX517848        |
| <i>Combretum celastroides</i> subsp. <i>orientale</i> Exell               | Myrtales     | Combretaceae   | JX572426        | JX517779        |
| <i>Combretum celastroides</i> Welw. ex M.A.Lawson                         | Myrtales     | Combretaceae   | JX572432        | JX517316        |
| <i>Combretum collinum</i> subsp. <i>gazense</i> (Swynn. & Baker f.) Okafa | Myrtales     | Combretaceae   | EU338158        | JX518029        |

|                                                                                       |            |              |                 |                 |
|---------------------------------------------------------------------------------------|------------|--------------|-----------------|-----------------|
| <i>Combretum collinum</i> subsp. <i>suluense</i> (Engl. & Diels) Okafa                | Myrtales   | Combretaceae | JX572434        | JX517634        |
| <i>Combretum collinum</i> subsp. <i>taborense</i> (Engl.) Okafa                       | Myrtales   | Combretaceae | JX572435        | JX517383        |
| <i>Combretum edwardsii</i> Exell                                                      | Myrtales   | Combretaceae | JX572436        | JX517430        |
| <i>Combretum elaeagnoides</i> Klotzsch                                                | Myrtales   | Combretaceae | JX572437        | JX517727        |
| <i>Combretum engleri</i> Schinz, De Wild. & T.Durand                                  | Myrtales   | Combretaceae | JX572438        | JX517943        |
| <i>Combretum erythrophyllum</i> (Burch.) Sond.                                        | Myrtales   | Combretaceae | JX572439        | JX517552        |
| <i>Combretum hereroense</i> Schinz                                                    | Myrtales   | Combretaceae | JX572440        | JX517597        |
| <i>Combretum imberbe</i> Wawra                                                        | Myrtales   | Combretaceae | JX572441        | JX517371        |
| <i>Combretum kirkii</i> M.A.Lawson                                                    | Myrtales   | Combretaceae | JX572442        | JX518242        |
| <i>Combretum kraussii</i> Hochst.                                                     | Myrtales   | Combretaceae | JX572443        | JX517576        |
| <i>Combretum microphyllum</i> Klotzsch                                                | Myrtales   | Combretaceae | JX572444        | JX517523        |
| <i>Combretum mkuzense</i> J.D.Carr & Retief                                           | Myrtales   | Combretaceae | JX572445        | JX517806        |
| <i>Combretum maggii</i> Exell                                                         | Myrtales   | Combretaceae | JX572446        | JX517385        |
| <i>Combretum molle</i> R.Br. ex G.Don                                                 | Myrtales   | Combretaceae | JX572447        | JX517775        |
| <i>Combretum mossambicense</i> (Klotzsch) Engl.                                       | Myrtales   | Combretaceae | JX572448        | JX517652        |
| <i>Combretum nelsonii</i> Dummer                                                      | Myrtales   | Combretaceae | EU338135        | JX517805        |
| <i>Combretum obovatum</i> F.Hoffm.                                                    | Myrtales   | Combretaceae | <b>KU568089</b> | <b>KX146311</b> |
| <i>Combretum oxystachyum</i> Welw. ex M.A.Lawson                                      | Myrtales   | Combretaceae | JX572449        | JX517306        |
| <i>Combretum padoides</i> Engl. & Diels                                               | Myrtales   | Combretaceae | JX572450        | JX517793        |
| <i>Combretum paniculatum</i> Vent.                                                    | Myrtales   | Combretaceae | JQ025035        | JQ024950        |
| <i>Combretum petrophilum</i> Retief                                                   | Myrtales   | Combretaceae | JX572451        | JX518046        |
| <i>Combretum pisoniiflorum</i> (Klotzsch) Engl.                                       | Myrtales   | Combretaceae | JX572452        | JX518020        |
| <i>Combretum platypetalum</i> Welw. ex M.A.Lawson                                     | Myrtales   | Combretaceae | JX572453        | JX517352        |
| <i>Combretum psidioides</i> subsp. <i>dinteri</i> (Schinz, De Wild. & T.Durand) Exell | Myrtales   | Combretaceae | JX572455        | JX517603        |
| <i>Combretum psidioides</i> Welw.                                                     | Myrtales   | Combretaceae | JX572454        | JX518060        |
| <i>Combretum stylesii</i> O.Maurin, Jordaan & A.E.van Wyk                             | Myrtales   | Combretaceae | HM208690        | HM208689        |
| <i>Combretum sylvicola</i> O.Maurin (= <i>Quisqualis parviflora</i> )                 | Myrtales   | Combretaceae | JX572916        | JX517360        |
| <i>Combretum tenuipes</i> Engl.                                                       | Myrtales   | Combretaceae | JX572456        | JX517521        |
| <i>Combretum vendae</i> A.E.van Wyk                                                   | Myrtales   | Combretaceae | JX572457        | JX517642        |
| <i>Combretum wattii</i> Exell                                                         | Myrtales   | Combretaceae | JX572458        | JX517772        |
| <i>Combretum woodii</i> Dummer                                                        | Myrtales   | Combretaceae | JX572459        | JX517558        |
| <i>Combretum zeyheri</i> Sond.                                                        | Myrtales   | Combretaceae | JX572460        | JX518241        |
| <i>Commiphora africana</i> (A.Rich.) Endl.                                            | Sapindales | Burseraceae  | JX572461        | JX518153        |
| <i>Commiphora edulis</i> (Klotzsch) Engl.                                             | Sapindales | Burseraceae  | JX572462        | JX517660        |
| <i>Commiphora glandulosa</i> Schinz                                                   | Sapindales | Burseraceae  | JF265359        | JF270712        |
| <i>Commiphora harveyi</i> (Engl.) Engl.                                               | Sapindales | Burseraceae  | JX572463        | JX517769        |
| <i>Commiphora marlothii</i> Engl.                                                     | Sapindales | Burseraceae  | JF265361        | JF270714        |
| <i>Commiphora mollis</i> (Oliv.) Engl.                                                | Sapindales | Burseraceae  | JX572464        | JX517798        |
| <i>Commiphora mossambicensis</i> (Oliv.) Engl.                                        | Sapindales | Burseraceae  | <b>KU567997</b> | <b>KX146263</b> |
| <i>Commiphora neglecta</i> Verd.                                                      | Sapindales | Burseraceae  | JF265363        | JF270716        |
| <i>Commiphora pyracanthoides</i> Engl.                                                | Sapindales | Burseraceae  | JX572465        | JX517515        |
| <i>Commiphora schimperi</i> (O.Bergman) Engl.                                         | Sapindales | Burseraceae  | JF265364        | JF270717        |

|                                                                             |              |               |                 |                 |
|-----------------------------------------------------------------------------|--------------|---------------|-----------------|-----------------|
| <i>Commiphora schlechteri</i> Engl.                                         | Sapindales   | Burseraceae   | KF147462        | KF147383        |
| <i>Commiphora serrata</i> Engl.                                             | Sapindales   | Burseraceae   | JX572466        | JX517449        |
| <i>Commiphora woodii</i> Engl.                                              | Sapindales   | Burseraceae   | JX572467        | JX517409        |
| <i>Commiphora zanzibarica</i> (Baill.) Engl.                                | Sapindales   | Burseraceae   | JX572468        | JX517960        |
| <i>Copaifera baumiana</i> Harms                                             | Fabales      | Fabaceae      | <b>KU568103</b> | -               |
| <i>Coptosperma littorale</i> (Hiern) Degreef                                | Gentianales  | Rubiaceae     | KF147463        | KF147384        |
| <i>Coptosperma nigrescens</i> Hook.f.                                       | Gentianales  | Rubiaceae     | <b>KU568032</b> | <b>KX146257</b> |
| <i>Coptosperma rhodesiacum</i> (Bremek.) Degreef                            | Gentianales  | Rubiaceae     | JX572559        | JX517753        |
| <i>Coptosperma supra-axillare</i> (Hemsl.) Degreef                          | Gentianales  | Rubiaceae     | JX572470        | JX517476        |
| <i>Coptosperma zygoon</i> (Bridson) Degreef                                 | Gentianales  | Rubiaceae     | JF265621        | JF270963        |
| <i>Cordia africana</i> Lam.                                                 | Boraginales  | Boraginaceae  | JX572471        | JX517865        |
| <i>Cordia caffra</i> Sond.                                                  | Boraginales  | Boraginaceae  | JF265366        | JF270719        |
| <i>Cordia goetzei</i> Gürke                                                 | -            | Boraginaceae  | <b>KU568135</b> | <b>KX146304</b> |
| <i>Cordia grandicalyx</i> Oberm.                                            | Boraginales  | Boraginaceae  | JF265367        | JF270720        |
| <i>Cordia monoica</i> Roxb.                                                 | Boraginales  | Boraginaceae  | JX572472        | JX517641        |
| <i>Cordia sinensis</i> Lam.                                                 | Boraginales  | Boraginaceae  | JF265370        | JF270723        |
| <i>Cordia stuhlmannii</i> Gürke                                             | Boraginales  | Boraginaceae  | JX572473        | JX517742        |
| <i>Cordia torrei</i> E.S.Martins                                            | Boraginales  | Boraginaceae  | JX572474        | JX517572        |
| <i>Cordyla africana</i> Lour.                                               | Fabales      | Fabaceae      | JX572475        | JX517855        |
| <i>Cornus volkensii</i> Harms                                               | Cornales     | Cornaceae     | <b>KU568142</b> | <b>KX146357</b> |
| <i>Craibia brevicaudata</i> subsp. <i>baptistarum</i> (Buttner) J.B.Gillett | Fabales      | Fabaceae      | JX572477        | JX517315        |
| <i>Craibia zimmermannii</i> (Harms) Dunn                                    | Fabales      | Fabaceae      | JX572478        | JX518072        |
| <i>Crassula arborescens</i> (Mill.) Willd.                                  | Saxifragales | Crassulaceae  | JX572479        | JX517536        |
| <i>Craterispermum aristatum</i> Wernham                                     | Gentianales  | Rubiaceae     | KC628479        | -               |
| <i>Craterispermum caudatum</i> Hutch.                                       | Gentianales  | Rubiaceae     | KC628327        | KC627687        |
| <i>Craterispermum schweinfurthii</i> Hiern                                  | Gentianales  | Rubiaceae     | JX572480        | JX517952        |
| <i>Cremaspora triflora</i> subsp. <i>confluens</i> (K.Schum.) Verdc.        | Gentianales  | Rubiaceae     | <b>KU568110</b> | <b>KX146329</b> |
| <i>Crossopteryx febrifuga</i> (Afzel. ex G.Don) Benth.                      | Gentianales  | Rubiaceae     | JX572481        | JX517365        |
| <i>Crotalaria capensis</i> Jacq.                                            | Fabales      | Fabaceae      | JX905970        | JX905953        |
| <i>Crotalaria laburnifolia</i> subsp. <i>australis</i> (Baker f.) Polhill   | Fabales      | Fabaceae      | JF265373        | JF270726        |
| <i>Crotalaria monteiroi</i> Baker f.                                        | Fabales      | Fabaceae      | JQ041241        | JQ041083        |
| <i>Croton gratissimus</i> Burch.                                            | Malpighiales | Euphorbiaceae | JX572483        | JX517905        |
| <i>Croton longiracemosus</i> Hutch.                                         | Malpighiales | Euphorbiaceae | KC628320        | KC627680        |
| <i>Croton madandensis</i> S.Moore                                           | Malpighiales | Euphorbiaceae | JX572484        | JX517472        |
| <i>Croton megalobotrys</i> Müll.Arg.                                        | Malpighiales | Euphorbiaceae | JX572485        | JX517792        |
| <i>Croton menyharthii</i> Pax                                               | Malpighiales | Euphorbiaceae | KF147464        | KF147385        |
| <i>Croton pseudopulchellus</i> Pax                                          | Malpighiales | Euphorbiaceae | JX572486        | JX517535        |
| <i>Croton steenkampianus</i> Gerstner                                       | Malpighiales | Euphorbiaceae | JX572487        | JX517563        |
| <i>Croton sylvaticus</i> Hochst.                                            | Malpighiales | Euphorbiaceae | JX572488        | JX517596        |
| <i>Crotonogyne strigosa</i> Prain                                           | Malpighiales | Euphorbiaceae | KC628473        | KC627797        |
| <i>Crotonogynopsis</i> sp. nov.                                             | Malpighiales | Euphorbiaceae | KC627971        | KC627424        |
| <i>Cryptocarya latifolia</i> Sond.                                          | Laurales     | Lauraceae     | JX572489        | JX518146        |

|                                                                            |              |                  |                 |                 |
|----------------------------------------------------------------------------|--------------|------------------|-----------------|-----------------|
| <i>Cryptocarya liebertiana</i> Engl.                                       | Lurales      | Lauraceae        | JX572490        | JX517403        |
| <i>Cryptocarya myrtifolia</i> Stapf                                        | Lurales      | Lauraceae        | JX572491        | JX517396        |
| <i>Cryptocarya natalensis</i> (Ross) Kosterm.                              | Lurales      | Lauraceae        | JX572498        | JX517839        |
| <i>Cryptocarya woodii</i> Engl.                                            | Lurales      | Lauraceae        | JX572492        | JX518198        |
| <i>Cryptocarya wyliei</i> Stapf                                            | Lurales      | Lauraceae        | JX572493        | JX517616        |
| <i>Cunonia capensis</i> L.                                                 | Oxalidales   | Cunoniaceae      | JX572494        | JX517913        |
| <i>Curtisia dentata</i> (Burm.f.) C.A.Sm.                                  | Cornales     | Cornaceae        | JX572495        | JX517790        |
| <i>Cussonia arborea</i> Hochst. ex A.Rich.                                 | Apiales      | Araliaceae       | JX905967        | JX970898        |
| <i>Cussonia arenicola</i> Strey                                            | Apiales      | Araliaceae       | -               | JX970904        |
| <i>Cussonia natalensis</i> Sond.                                           | Apiales      | Araliaceae       | JF265381        | JF270733        |
| <i>Cussonia nicholsonii</i> Strey                                          | Apiales      | Araliaceae       | -               | KF147386        |
| <i>Cussonia paniculata</i> subsp. <i>sinuata</i> (Reyneke & Kok) De Winter | Apiales      | Araliaceae       | -               | KF147387        |
| <i>Cussonia sphaerocephala</i> Strey                                       | Apiales      | Araliaceae       | -               | KF147388        |
| <i>Cussonia spicata</i> Thunb.                                             | Apiales      | Araliaceae       | JF265382        | JF270734        |
| <i>Cussonia thyrsoflora</i> Thunb.                                         | Apiales      | Araliaceae       | JX572496        | JX517785        |
| <i>Cussonia transvaalensis</i> Reyneke                                     | Apiales      | Araliaceae       | JX905963        | JX970897        |
| <i>Cussonia zimmermannii</i> Harms                                         | Apiales      | Araliaceae       | <b>KU567990</b> | <b>KX146223</b> |
| <i>Cussonia zuluensis</i> Strey                                            | Apiales      | Araliaceae       | -               | KF147389        |
| <i>Cuviera trilocularis</i> Hiern                                          | Gentianales  | Rubiaceae        | KC628109        | KC627521        |
| <i>Cuviera wernhamii</i> Cheek                                             | Gentianales  | Rubiaceae        | KC628252        | -               |
| <i>Cycas thouarsii</i> R.Br.                                               | Cycadales    | Cycadaceae       | AF394336        | AB116589        |
| <i>Cyclopia genistoides</i> (L.) Vent.                                     | Fabales      | Fabaceae         | JX572497        | JX518243        |
| <i>Dacryodes buettneri</i> (Engl.) H.J.Lam                                 | Sapindales   | Burseraceae      | KC628447        | KC627778        |
| <i>Dacryodes edulis</i> (G.Don) H.J.Lam                                    | Sapindales   | Burseraceae      | KC628643        | KC627916        |
| <i>Dacryodes klaineana</i> (Pierre) H.J.Lam                                | Sapindales   | Burseraceae      | KC628525        | KC627833        |
| <i>Dacryodes letestui</i> (Pellegr.) H.J.Lam                               | Sapindales   | Burseraceae      | KC628536        | KC627838        |
| <i>Dactyladenia palleescens</i> (Baill.) Prance & F.White                  | Malpighiales | Chrysobalanaceae | KC628312        | -               |
| <i>Dactyladenia staudtii</i> (Engl.) Prance & F.White                      | Malpighiales | Chrysobalanaceae | KC627955        | KC627412        |
| <i>Dais cotinifolia</i> L.                                                 | Malvales     | Thymelaeaceae    | -               | JX517520        |
| <i>Dalbergia arbutifolia</i> Baker                                         | Fabales      | Fabaceae         | JX572499        | JX517956        |
| <i>Dalbergia armata</i> E.Mey.                                             | Fabales      | Fabaceae         | JX572500        | JX517400        |
| <i>Dalbergia boehmii</i> Taub.                                             | Fabales      | Fabaceae         | JX572501        | JX517962        |
| <i>Dalbergia melanoxydon</i> Guill. & Perr.                                | Fabales      | Fabaceae         | JX572502        | JX517916        |
| <i>Dalbergia multijuga</i> E.Mey.                                          | Fabales      | Fabaceae         | JX572503        | JX517995        |
| <i>Dalbergia nitidula</i> Baker                                            | Fabales      | Fabaceae         | -               | JX970899        |
| <i>Dalbergia obovata</i> E.Mey.                                            | Fabales      | Fabaceae         | JX572504        | JX517804        |
| <i>Dalbergiella nyassae</i> Baker f.                                       | Fabales      | Fabaceae         | AF308724        | AF142706        |
| <i>Dasylepis thomasii</i> Obama & Breteler                                 | Malpighiales | Achariaceae      | KC628581        | KC627872        |
| <i>Deinbollia borbonica</i> Scheff.                                        | Sapindales   | Sapindaceae      | <b>KU568035</b> | <b>KX146260</b> |
| <i>Deinbollia maxima</i> Gilg                                              | Sapindales   | Sapindaceae      | KC628634        | KC627910        |
| <i>Deinbollia oblongifolia</i> (E.Mey.) Radlk.                             | Sapindales   | Sapindaceae      | JX572505        | JX517693        |
| <i>Deinbollia pycnophylla</i> Gilg ex Radlk.                               | Sapindales   | Sapindaceae      | KC627952        | KC627410        |

|                                                                        |              |                 |                 |                 |
|------------------------------------------------------------------------|--------------|-----------------|-----------------|-----------------|
| <i>Deinbollia xanthocarpa</i> (Klotzsch) Radlk.                        | Sapindales   | Sapindaceae     | JX572506        | JX518221        |
| <i>Derris trifoliata</i> Lour.                                         | Fabales      | Fabaceae        | -               | HM049528        |
| <i>Desbordesia glaucescens</i> (Engl.) Tiegh.                          | Malpighiales | Irvingiaceae    | KC628066        | KC627493        |
| <i>Dialium corbisieri</i> Staner                                       | Fabales      | Fabaceae        | KC628567        | -               |
| <i>Dialium pachyphyllum</i> Harms                                      | Fabales      | Fabaceae        | KC628233        | -               |
| <i>Dialium polyanthum</i> Harms                                        | Fabales      | Fabaceae        | KC628602        | -               |
| <i>Dialium schlechteri</i> Harms                                       | Fabales      | Fabaceae        | JX572507        | JX517752        |
| <i>Dialium tessmannii</i> Harms                                        | Fabales      | Fabaceae        | KC628426        | KC627763        |
| <i>Dichapetalum barbosa</i> Torre                                      | Malpighiales | Dichapetalaceae | KF147466        | -               |
| <i>Dichapetalum cymosum</i> (Hook.) Engl.                              | Malpighiales | Dichapetalaceae | KF147465        | -               |
| <i>Dichapetalum deflexum</i> (Klotzsch) Engl.                          | Malpighiales | Dichapetalaceae | <b>KU568125</b> | -               |
| <i>Dichapetalum edule</i> Engl.                                        | Malpighiales | Dichapetalaceae | <b>KU568045</b> | -               |
| <i>Dichapetalum macrocarpum</i> Engl.                                  | Malpighiales | Dichapetalaceae | <b>KU568029</b> | -               |
| <i>Dichostemma glaucescens</i> Pierre                                  | Malpighiales | Euphorbiaceae   | KC628156        | KC627554        |
| <i>Dichrostachys cinerea</i> subsp. <i>africana</i> Brenan & Brummitt  | Fabales      | Fabaceae        | JF265387        | JF270739        |
| <i>Dichrostachys cinerea</i> subsp. <i>nyassana</i> (Taub.) Brenan     | Fabales      | Fabaceae        | JX572508        | JX517857        |
| <i>Didelta spinosa</i> (L.f.) Aiton                                    | Asterales    | Asteraceae      | JX572509        | JX517877        |
| <i>Dielsiothamnus divaricatus</i> (Diels) R.E.Fr.                      | Magnoliales  | Annonaceae      | <b>KU568007</b> | <b>KX146236</b> |
| <i>Diagoa zenkeri</i> (Engl.) Exell & Mendonça                         | Santalales   | Olacaceae       | KC628523        | KC627832        |
| <i>Dioscorea elephantipes</i> (L'Hér.) Engl.                           | Dioscoreales | Dioscoreaceae   | JX572510        | JX517322        |
| <i>Dioscorea strydomiana</i> Wilkin                                    | Dioscoreales | Dioscoreaceae   | KF147467        | KF147390        |
| <i>Diospyros abyssinica</i> (Hiern) F.White                            | Ericales     | Ebenaceae       | -               | DQ923990        |
| <i>Diospyros batocana</i> Hiern                                        | Ericales     | Ebenaceae       | -               | JX518223        |
| <i>Diospyros dichrophylla</i> (Gand.) De Winter                        | Ericales     | Ebenaceae       | JX572512        | JX517311        |
| <i>Diospyros ferrea</i> (Willd.) Bakh.                                 | Ericales     | Ebenaceae       | -               | JX517320        |
| <i>Diospyros gabunensis</i> Gürke                                      | Ericales     | Ebenaceae       | KC628516        | KC627827        |
| <i>Diospyros glabra</i> (L.) De Winter                                 | Ericales     | Ebenaceae       | JX572513        | JX517984        |
| <i>Diospyros gracilescens</i> Gürke                                    | Ericales     | Ebenaceae       | KC627997        | KC627446        |
| <i>Diospyros hoyleana</i> F.White                                      | Ericales     | Ebenaceae       | KC628232        | -               |
| <i>Diospyros inhacaensis</i> F.White                                   | Ericales     | Ebenaceae       | JX572514        | JX518070        |
| <i>Diospyros iturensis</i> (Gürke) Letouzey & F.White                  | Ericales     | Ebenaceae       | KC628384        | KC627732        |
| <i>Diospyros kirkii</i> Hiern                                          | Ericales     | Ebenaceae       | <b>KU568068</b> | <b>KX146291</b> |
| <i>Diospyros korupensis</i> Gosline                                    | Ericales     | Ebenaceae       | KC628166        | KC627561        |
| <i>Diospyros loureiroana</i> G.Don                                     | Ericales     | Ebenaceae       | JX572515        | JX517697        |
| <i>Diospyros lycioides</i> Desf.                                       | Ericales     | Ebenaceae       | JX572516        | JX517594        |
| <i>Diospyros lycioides</i> subsp. <i>guerkei</i> (Kuntze) De Winter    | Ericales     | Ebenaceae       | JX572517        | JX517451        |
| <i>Diospyros mannii</i> Hiern                                          | Ericales     | Ebenaceae       | KC628341        | -               |
| <i>Diospyros mespiliformis</i> Hochst. ex A.DC.                        | Ericales     | Ebenaceae       | JF265390        | JF270742        |
| <i>Diospyros natalensis</i> (Harv.) Brenan                             | Ericales     | Ebenaceae       | JF265391        | JF270743        |
| <i>Diospyros natalensis</i> subsp. <i>nummularia</i> (Brenan) F. White | Ericales     | Ebenaceae       | JX572518        | JX518127        |
| <i>Diospyros obliquifolia</i> (Hiern ex Gürke) F.White                 | Ericales     | Ebenaceae       | KC628444        | KC627775        |
| <i>Diospyros parviflora</i> (Schltr.) Bakh.                            | Ericales     | Ebenaceae       | <b>KU568121</b> | <b>KX146339</b> |

|                                                                                   |              |                 |                 |                 |
|-----------------------------------------------------------------------------------|--------------|-----------------|-----------------|-----------------|
| <i>Diospyros piscatoria</i> Gürke                                                 | Ericales     | Ebenaceae       | KC628663        | KC627931        |
| <i>Diospyros preussii</i> Gürke                                                   | Ericales     | Ebenaceae       | KC628043        | KC627475        |
| <i>Diospyros pseudomespilus</i> subsp. <i>undabunda</i> (Hiern ex Greves) F.White | Ericales     | Ebenaceae       | <b>KU568011</b> | <b>KX146240</b> |
| <i>Diospyros rotundifolia</i> Hiern                                               | Ericales     | Ebenaceae       | JX572519        | JX517440        |
| <i>Diospyros scabrida</i> (Harv. ex Hiern) De Winter                              | Ericales     | Ebenaceae       | JX572520        | JX517782        |
| <i>Diospyros simii</i> (Kuntze) De Winter                                         | Ericales     | Ebenaceae       | JX572521        | JX517301        |
| <i>Diospyros squarrosa</i> Klotzsch                                               | Ericales     | Ebenaceae       | JX572511        | JX517402        |
| <i>Diospyros truncatifolia</i> Caveney                                            | Ericales     | Ebenaceae       | <b>KU568084</b> | <b>KX146350</b> |
| <i>Diospyros verrucosa</i> Hiern                                                  | Ericales     | Ebenaceae       | JX572522        | JX517758        |
| <i>Diospyros verrucosa</i> Hiern                                                  | Ericales     | Ebenaceae       | <b>KU568095</b> | <b>KX146316</b> |
| <i>Diospyros villosa</i> (L.) De Winter                                           | Ericales     | Ebenaceae       | JF265392        | JF270744        |
| <i>Diospyros villosa</i> var. <i>parvifolia</i> De Winter                         | Ericales     | Ebenaceae       | JX572523        | JX517761        |
| <i>Diospyros virgata</i> (Gürke) Brenan                                           | Ericales     | Ebenaceae       | <b>KU568001</b> | -               |
| <i>Diospyros whyteana</i> (Hiern) P.White                                         | Ericales     | Ebenaceae       | JX572524        | JX517711        |
| <i>Diospyros zenkeri</i> (Gürke) F.White                                          | Ericales     | Ebenaceae       | KC628366        | KC627717        |
| <i>Diplorhynchus condylocarpon</i> (Müll.Arg.) Pichon                             | Gentianales  | Apocynaceae     | JX572525        | JX517728        |
| <i>Discoglypemma caloneura</i> (Pax) Prain                                        | Malpighiales | Euphorbiaceae   | KC628326        | KC627686        |
| <i>Dissotis princeps</i> (Kunth) Triana                                           | Myrtales     | Melastomataceae | KF147469        | KF147392        |
| <i>Distephanus divaricatus</i> (Steetz) H.Rob. & B.Kahn                           | Asterales    | Asteraceae      | JX572526        | JX517719        |
| <i>Dodonaea viscosa</i> Jacq.                                                     | Sapindales   | Sapindaceae     | JX572528        | JX517889        |
| <i>Dodonaea viscosa</i> subsp. <i>angustifolia</i> (L.f.) J.G.West.               | Sapindales   | Sapindaceae     | JX572527        | JX517975        |
| <i>Dolichandrone alba</i> (Sim) Sprague                                           | Lamiales     | Bignoniaceae    | <b>KU568156</b> | <b>KX146371</b> |
| <i>Dombeya acutangula</i> Cav.                                                    | Malvales     | Malvaceae       | <b>KU568031</b> | <b>KX146306</b> |
| <i>Dombeya autumnalis</i> Verd.                                                   | Malvales     | Malvaceae       | JX572529        | JX518097        |
| <i>Dombeya burgessiae</i> Gerrard ex Harv. & Sond.                                | Malvales     | Malvaceae       | JX572530        | JX517847        |
| <i>Dombeya cymosa</i> Harv.                                                       | Malvales     | Malvaceae       | JX572531        | JX518206        |
| <i>Dombeya kirkii</i> Mast.                                                       | Malvales     | Malvaceae       | <b>KM894212</b> | <b>KM896889</b> |
| <i>Dombeya rotundifolia</i> Planch.                                               | Malvales     | Malvaceae       | JQ025044        | JQ024959        |
| <i>Dombeya shupangae</i> K.Schum.                                                 | Malvales     | Malvaceae       | <b>KM894231</b> | <b>KM896907</b> |
| <i>Dombeya tiliacea</i> (Endl.) Planch.                                           | Malvales     | Malvaceae       | JX572532        | JX517694        |
| <i>Dovyalis coffra</i> (Hook. f. & Harv.) Warb.                                   | Malpighiales | Salicaceae      | JX572533        | JX518128        |
| <i>Dovyalis hispidula</i> Wild                                                    | Malpighiales | Salicaceae      | JX572534        | JX518035        |
| <i>Dovyalis longispina</i> Warb.                                                  | Malpighiales | Salicaceae      | JX572535        | JX517689        |
| <i>Dovyalis lucida</i> Sim                                                        | Malpighiales | Salicaceae      | JX572536        | JX517715        |
| <i>Dovyalis rhamnoides</i> (Burch. ex DC.) Burch. ex Harv. & Sond.                | Malpighiales | Salicaceae      | Z75677          | EF135529        |
| <i>Dovyalis xanthocarpa</i> Bullock                                               | Malpighiales | Salicaceae      | JX572537        | JX517323        |
| <i>Dracaena alettriformis</i> (Haw.) Bos                                          | Asparagales  | Asparagaceae    | JX572538        | JX517850        |
| <i>Dracaena laxissima</i> Engl.                                                   | Asparagales  | Asparagaceae    | KC628588        | KC627876        |
| <i>Dracaena mannii</i> Baker                                                      | Asparagales  | Asparagaceae    | JX572539        | JX517338        |
| <i>Dracaena steudneri</i> Engl.                                                   | Asparagales  | Asparagaceae    | <b>KU567996</b> | <b>KX146302</b> |
| <i>Dracaena transvaalensis</i> Baker                                              | Asparagales  | Asparagaceae    | JX572540        | JX517732        |
| <i>Drypetes arguta</i> (Müll.Arg.) Hutch.                                         | Malpighiales | Euphorbiaceae   | JX572541        | JX905959        |

|                                                                     |              |                |                 |                 |
|---------------------------------------------------------------------|--------------|----------------|-----------------|-----------------|
| <i>Drypetes gerrardii</i> Hutch.                                    | Malpighiales | Euphorbiaceae  | JF265399        | KF147393        |
| <i>Drypetes ivorensis</i> Hutch. & Dalziel                          | Malpighiales | Putranjivaceae | KC628499        | -               |
| <i>Drypetes laciniata</i> (Pax) Hutch.                              | Malpighiales | Putranjivaceae | KC628555        | -               |
| <i>Drypetes mossambicensis</i> Hutch.                               | Malpighiales | Putranjivaceae | <b>KM894236</b> | -               |
| <i>Drypetes natalensis</i> (Harv.) Hutch.                           | Malpighiales | Putranjivaceae | <b>KM894239</b> | -               |
| <i>Drypetes principum</i> (Müll.Arg.) Hutch.                        | Malpighiales | Putranjivaceae | KC628383        | KC627731        |
| <i>Drypetes reticulata</i> Pax                                      | Malpighiales | Euphorbiaceae  | JF265400        | JF270750        |
| <i>Drypetes staudtii</i> (Pax) Hutch.                               | Malpighiales | Putranjivaceae | KC628290        | KC627657        |
| <i>Ecpoma gigantistipula</i> (K. Schum.) N. Hallé                   | Gentianales  | Rubiaceae      | KC628118        | KC627528        |
| <i>Ehretia amoena</i> Klotzsch                                      | Boraginales  | Boraginaceae   | JX572543        | JX518091        |
| <i>Ehretia rigida</i> (Thunb.) Druce                                | Boraginales  | Boraginaceae   | JX572544        | JX518014        |
| <i>Ekebergia capensis</i> Sparrm.                                   | Sapindales   | Meliaceae      | <b>KM894215</b> | -               |
| <i>Ekebergia pterophylla</i> (C.DC.) Hofmeyr                        | Sapindales   | Meliaceae      | JX572545        | JX517845        |
| <i>Elephantorrhiza burkei</i> Benth.                                | Fabales      | Fabaceae       | JX572548        | JX517971        |
| <i>Elephantorrhiza elephantina</i> (Burch.) Skeels                  | Fabales      | Fabaceae       | JF265409        | JF270759        |
| <i>Elephantorrhiza goetzei</i> (Harms) Harms                        | Fabales      | Fabaceae       | JX572549        | JX517358        |
| <i>Elephantorrhiza obliqua</i> Burt Davy                            | Fabales      | Fabaceae       | -               | KF147394        |
| <i>Embelia xylocarpa</i> P.Halliday                                 | Ericales     | Primulaceae    | JX572550        | JX517939        |
| <i>Empleurum unicusulare</i> (L. f.) Skeels                         | Sapindales   | Rutaceae       | KF147470        | KF147395        |
| <i>Empogona cacondensis</i> (Hiern) Tosh & Robbr.                   | Gentianales  | Rubiaceae      | <b>KU567988</b> | <b>KX146221</b> |
| <i>Empogona coriacea</i> (Sond.) Tosh & Robbr.                      | Gentianales  | Rubiaceae      | JX573062        | JX517841        |
| <i>Empogona kirkii</i> subsp. <i>junodii</i> (Schinz) Tosh & Robbr. | Gentianales  | Rubiaceae      | JX573060        | JX517789        |
| <i>Empogona lanceolata</i> (Sond.) Tosh & Robbr.                    | Gentianales  | Rubiaceae      | JX573061        | JX517571        |
| <i>Encephalartos aemulans</i> Vorster                               | Cycadales    | Zamiaceae      | JQ025439        | JQ046261        |
| <i>Encephalartos altensteinii</i> Lehm.                             | Cycadales    | Zamiaceae      | JQ025442        | JQ046260        |
| <i>Encephalartos arenarius</i> R.A.Dyer                             | Cycadales    | Zamiaceae      | JQ025455        | JQ046257        |
| <i>Encephalartos brevifoliolatus</i> Vorster                        | Cycadales    | Zamiaceae      | JQ025459        | JQ046253        |
| <i>Encephalartos chimanimaniensis</i> R.A.Dyer & Verdoorn           | Cycadales    | Zamiaceae      | JQ025476        | JQ046247        |
| <i>Encephalartos concinnus</i> R.A.Dyer & Verdoorn                  | Cycadales    | Zamiaceae      | JQ025479        | JQ046246        |
| <i>Encephalartos cupidus</i> R.A.Dyer                               | Cycadales    | Zamiaceae      | JQ025481        | JQ046245        |
| <i>Encephalartos dolomiticus</i> Lavranos & D.L.Goode               | Cycadales    | Zamiaceae      | JQ025489        | JQ046242        |
| <i>Encephalartos dyerianus</i> Lavranos & D.L.Goode                 | Cycadales    | Zamiaceae      | JQ025491        | JQ046241        |
| <i>Encephalartos eugene-maraisii</i> Verd.                          | Cycadales    | Zamiaceae      | JQ025502        | JQ046238        |
| <i>Encephalartos ferox</i> G.Bertol.                                | Cycadales    | Zamiaceae      | JQ025506        | JQ046236        |
| <i>Encephalartos friderici-guillielmi</i> Lehm.                     | Cycadales    | Zamiaceae      | JQ025512        | JQ046234        |
| <i>Encephalartos ghellinckii</i> Lem.                               | Cycadales    | Zamiaceae      | JQ025518        | JQ046232        |
| <i>Encephalartos heenanii</i> R.A.Dyer                              | Cycadales    | Zamiaceae      | JQ025528        | JQ046229        |
| <i>Encephalartos hirsutus</i> P.J.H.Hurter                          | Cycadales    | Zamiaceae      | JQ025534        | JQ046226        |
| <i>Encephalartos inopinus</i> R.A.Dyer                              | Cycadales    | Zamiaceae      | JQ025547        | JQ046221        |
| <i>Encephalartos laevifolius</i> Stapf & Burt Davy                  | Cycadales    | Zamiaceae      | JQ025555        | JQ046215        |

|                                                                            |              |               |          |                 |
|----------------------------------------------------------------------------|--------------|---------------|----------|-----------------|
| <i>Encephalartos lanatus</i> Stapf & Burtt Davy                            | Cycadales    | Zamiaceae     | JQ025562 | JQ046213        |
| <i>Encephalartos latifrons</i> Lehm.                                       | Cycadales    | Zamiaceae     | JQ025566 | JQ046211        |
| <i>Encephalartos lebomboensis</i> Verd.                                    | Cycadales    | Zamiaceae     | JQ025580 | JQ046207        |
| <i>Encephalartos lehmannii</i> Lehm.                                       | Cycadales    | Zamiaceae     | JQ025583 | JQ046205        |
| <i>Encephalartos longifolius</i> (Jacq.) Lehm.                             | Cycadales    | Zamiaceae     | JQ025592 | JQ046203        |
| <i>Encephalartos manikensis</i> (Gilliland) Gilliland                      | Cycadales    | Zamiaceae     | JQ025597 | JQ046201        |
| <i>Encephalartos middelburgensis</i> Vorster, Robbertse & S.van der Westh. | Cycadales    | Zamiaceae     | JQ025608 | JQ046199        |
| <i>Encephalartos msinganus</i> Vorster                                     | Cycadales    | Zamiaceae     | JQ025610 | JQ046198        |
| <i>Encephalartos natalensis</i> R.A.Dyer & Verdoorn                        | Cycadales    | Zamiaceae     | JQ025619 | JQ046194        |
| <i>Encephalartos nubimontanus</i> P.J.H.Hurter                             | Cycadales    | Zamiaceae     | JQ025629 | JQ046190        |
| <i>Encephalartos paucidentatus</i> Stapf & Burtt Davy                      | Cycadales    | Zamiaceae     | JQ025636 | JQ046283        |
| <i>Encephalartos princeps</i> R.A.Dyer                                     | Cycadales    | Zamiaceae     | JQ025639 | JQ046185        |
| <i>Encephalartos relictus</i> P.J.H.Hurter                                 | Cycadales    | Zamiaceae     | JQ025643 | <b>KP979388</b> |
| <i>Encephalartos senticosus</i> Vorster                                    | Cycadales    | Zamiaceae     | JQ025652 | JQ046181        |
| <i>Encephalartos transvenosus</i> Stapf & Burtt Davy                       | Cycadales    | Zamiaceae     | JQ025667 | JQ046178        |
| <i>Encephalartos villosus</i> Lem.                                         | Cycadales    | Zamiaceae     | JQ025594 | JQ046172        |
| <i>Encephalartos woodii</i> Sander                                         | Cycadales    | Zamiaceae     | JQ025701 | JQ046169        |
| <i>Endodesmia calophylloides</i> Benth.                                    | Malpighiales | Clusiaceae    | KC628469 | -               |
| <i>Englerodaphne ovalifolia</i> (Meisn.) E.Phillips                        | Malvales     | Thymelaeaceae | JX572551 | JX517508        |
| <i>Englerodaphne pilosa</i> Burtt Davy                                     | Malvales     | Thymelaeaceae | JX572552 | JX518068        |
| <i>Englerophytum magalismsontanum</i> (Sond.) T.D.Penn.                    | Ericales     | Sapotaceae    | JX572553 | JX517982        |
| <i>Englerophytum natalense</i> (Sond.) T.D.Penn.                           | Ericales     | Sapotaceae    | JX572554 | JX517936        |
| <i>Ensete ventricosum</i> (Welw.) Cheesman                                 | Zingiberales | Musaceae      | JX572555 | JX517741        |
| <i>Entada abyssinica</i> A.Rich.                                           | Fabales      | Fabaceae      | JX572556 | JX517780        |
| <i>Entada rheedii</i> Spreng.                                              | Fabales      | Fabaceae      | JQ025045 | JQ024960        |
| <i>Entada wahlbergii</i> Harv.                                             | Fabales      | Fabaceae      | JX572557 | JX517580        |
| <i>Entandrophragma caudatum</i> (Sprague) Sprague                          | Sapindales   | Meliaceae     | JX572558 | JX517565        |
| <i>Ephippiocarpa orientalis</i> (S.Moore) Markgr.                          | Gentianales  | Apocynaceae   | JX572363 | JX517331        |
| <i>Erica areolata</i> (N.E.Br.) E.G.H.Oliv.                                | Ericales     | Ericaceae     | KP110270 | KP110040        |
| <i>Erica articularis</i> L.                                                | Ericales     | Ericaceae     | KP110271 | -               |
| <i>Erica brachialis</i> Salisb.                                            | Ericales     | Ericaceae     | KP110272 | KP110042        |
| <i>Erica caffra</i> L.                                                     | Ericales     | Ericaceae     | JX572560 | JX517891        |
| <i>Erica calycina</i> L.                                                   | Ericales     | Ericaceae     | KP110273 | KP110043        |
| <i>Erica cerinthoides</i> L.                                               | Ericales     | Ericaceae     | KP110274 | KP110044        |
| <i>Erica coccinea</i> L.                                                   | Ericales     | Ericaceae     | KM894262 | KM896932        |
| <i>Erica cordata</i> Andrews                                               | Ericales     | Ericaceae     | KP110275 | -               |
| <i>Erica corifolia</i> L.                                                  | Ericales     | Ericaceae     | KP110276 | KP110045        |
| <i>Erica curvifolia</i> Salisb.                                            | Ericales     | Ericaceae     | KP110277 | -               |
| <i>Erica daphniflora</i> Salisb.                                           | Ericales     | Ericaceae     | KP110279 | KP110047        |
| <i>Erica equisetifolia</i> Salisb.                                         | Ericales     | Ericaceae     | KP110280 | -               |
| <i>Erica ericoides</i> (L.) E.G.H.Oliv.                                    | Ericales     | Ericaceae     | -        | KP110048        |

|                                                  |             |              |                 |                 |
|--------------------------------------------------|-------------|--------------|-----------------|-----------------|
| <i>Erica fascicularis</i> L.f.                   | Ericales    | Ericaceae    | -               | KP110049        |
| <i>Erica gracilis</i> J.C.Wendl.                 | Ericales    | Ericaceae    | <b>KP110282</b> | -               |
| <i>Erica grata</i> L.Guthrie & Bolus             | Ericales    | Ericaceae    | KP110283        | -               |
| <i>Erica hispidula</i> L.                        | Ericales    | Ericaceae    | KP110284        | KP110050        |
| <i>Erica infundibuliformis</i> Andrews           | Ericales    | Ericaceae    | KP110286        | KP110051        |
| <i>Erica labialis</i> Salisb.                    | Ericales    | Ericaceae    | KP110288        | -               |
| <i>Erica madida</i> E.G.H.Oliv.                  | Ericales    | Ericaceae    | KP110289        | -               |
| <i>Erica massonii</i> L.f.                       | Ericales    | Ericaceae    | KP110290        | KP110053        |
| <i>Erica melanthera</i> L.                       | Ericales    | Ericaceae    | KP110291        | KP110054        |
| <i>Erica muscosa</i> (Aiton) E.G.H.Oliv.         | Ericales    | Ericaceae    | KP110293        | KP110056        |
| <i>Erica natalitia</i> Bolus                     | Ericales    | Ericaceae    | JX572561        | JX518173        |
| <i>Erica nudiflora</i> L.                        | Ericales    | Ericaceae    | KP110294        | KP110057        |
| <i>Erica pectinifolia</i> Salisb.                | Ericales    | Ericaceae    | KM894228        | KM896904        |
| <i>Erica penicilliformis</i> Salisb.             | Ericales    | Ericaceae    | KP110295        | -               |
| <i>Erica placentiflora</i> Salisb.               | Ericales    | Ericaceae    | KP110296        | -               |
| <i>Erica plukenetii</i> L.                       | Ericales    | Ericaceae    | KP110297        | -               |
| <i>Erica plumosa</i> Thunb.                      | Ericales    | Ericaceae    | KP110298        | -               |
| <i>Erica rigidula</i> (N.E.Br.) E.G.H.Oliv.      | Ericales    | Ericaceae    | KP110299        | KP110058        |
| <i>Erica rosacea</i> (L.Guthrie) E.G.H.Oliv.     | Ericales    | Ericaceae    | KP110300        | -               |
| <i>Erica serrata</i> Thunb.                      | Ericales    | Ericaceae    | KP110301        | -               |
| <i>Erica similis</i> (N.E.Br.) E.G.H.Oliv.       | Ericales    | Ericaceae    | KP110302        | -               |
| <i>Erica sitiens</i> Klotzsch                    | Ericales    | Ericaceae    | KP110303        | KP110059        |
| <i>Erica squarrosa</i> Salisb.                   | Ericales    | Ericaceae    | KP110304        | KP110060        |
| <i>Erica triceps</i> Link                        | Ericales    | Ericaceae    | KP110305        | -               |
| <i>Erica triflora</i> L.                         | Ericales    | Ericaceae    | -               | JX518211        |
| <i>Erica verecunda</i> Salisb.                   | Ericales    | Ericaceae    | KP110306        | -               |
| <i>Erica versicolor</i> Andrews                  | Ericales    | Ericaceae    | KP110307        | KP110061        |
| <i>Erica vestita</i> Thunb.                      | Ericales    | Ericaceae    | KP110308        | KP110062        |
| <i>Erica viscaria</i> L.                         | Ericales    | Ericaceae    | KP110309        | -               |
| <i>Eriosema psoraleoides</i> (Lam.) G.Don        | Fabales     | Fabaceae     | <b>KM894224</b> | <b>KM896900</b> |
| <i>Eriosemopsis subanisophylla</i> Robyns        | Gentianales | Rubiaceae    | <b>KU568129</b> | KF147396        |
| <i>Erismadelphus exsul</i> Mildbr.               | Myrtales    | Vochysiaceae | KC628056        | KC627485        |
| <i>Erythrina abyssinica</i> DC.                  | Fabales     | Fabaceae     | JX572563        | JX518054        |
| <i>Erythrina acanthocarpa</i> E.Mey.             | Fabales     | Fabaceae     | KF147471        | KF147397        |
| <i>Erythrina baumii</i> Harms                    | Fabales     | Fabaceae     | <b>KU568019</b> | -               |
| <i>Erythrina caffra</i> Thunb.                   | Fabales     | Fabaceae     | JQ412356        | JQ412236        |
| <i>Erythrina humeana</i> Spreng.                 | Fabales     | Fabaceae     | JF265413        | JF270763        |
| <i>Erythrina latissima</i> E.Mey.                | Fabales     | Fabaceae     | JF265414        | -               |
| <i>Erythrina livingstoniana</i> Baker            | Fabales     | Fabaceae     | JX572564        | JX517778        |
| <i>Erythrina lysistemon</i> Hutch.               | Fabales     | Fabaceae     | JF265415        | JF270764        |
| <i>Erythrina madagascariensis</i> Du Puy & Labat | Fabales     | Fabaceae     | <b>KU568115</b> | -               |
| <i>Erythrina saculeuxii</i> Hua                  | Fabales     | Fabaceae     | <b>KU568087</b> | <b>KX146309</b> |

|                                                                   |              |                  |                 |                 |
|-------------------------------------------------------------------|--------------|------------------|-----------------|-----------------|
| <i>Erythrina zeyheri</i> Harv.                                    | Fabales      | Fabaceae         | JX572565        | JX517714        |
| <i>Erythrococca Benth.</i> sp.nov.                                | Malpighiales | Euphorbiaceae    | JX572566        | JX517713        |
| <i>Erythrococca berberidea</i> Prain                              | Malpighiales | Euphorbiaceae    | <b>KU567989</b> | -               |
| <i>Erythrococca menyharthii</i> (Pax) Prain                       | Malpighiales | Euphorbiaceae    | JX572567        | JX517550        |
| <i>Erythrophleum africanum</i> (Benth.) Harms                     | Fabales      | Fabaceae         | JX572568        | JX517525        |
| <i>Erythrophleum ivorense</i> A.Chev.                             | Fabales      | Fabaceae         | KC628051        | KC627480        |
| <i>Erythrophleum suaveolens</i> (Guill. & Perr.) Brenan           | Fabales      | Fabaceae         | JX572569        | JX517934        |
| <i>Erythrophysa alata</i> (Eckl. & Zeyh.) Hutch.                  | Sapindales   | Sapindaceae      | <b>KM894210</b> | <b>KM896887</b> |
| <i>Erythroxyllum delagoense</i> Schinz                            | Malpighiales | Erythroxyllaceae | JF265416        | JF270765        |
| <i>Erythroxyllum emarginatum</i> Thonn.                           | Malpighiales | Erythroxyllaceae | JX572570        | JX517436        |
| <i>Erythroxyllum pictum</i> E.Mey. ex Harv. & Sond.               | Malpighiales | Erythroxyllaceae | JX572571        | JX517740        |
| <i>Erythroxyllum zambesiaccum</i> N.Robson                        | Malpighiales | Erythroxyllaceae | <b>KU568013</b> | -               |
| <i>Euclea coriacea</i> A.DC.                                      | Ericales     | Ebenaceae        | JX572573        | JX517506        |
| <i>Euclea crispa</i> (Thunb.) Gürke                               | Ericales     | Ebenaceae        | JX572574        | JX517391        |
| <i>Euclea divinatorum</i> Hiern                                   | Ericales     | Ebenaceae        | JF265418        | JF270767        |
| <i>Euclea natalensis</i> A.DC.                                    | Ericales     | Ebenaceae        | JX572575        | JX517663        |
| <i>Euclea natalensis</i> A.DC. subsp. <i>rotundifolia</i> F.White | Ericales     | Ebenaceae        | KF147472        | KF147398        |
| <i>Euclea natalensis</i> subsp. <i>angustifolia</i> F. White      | Ericales     | Ebenaceae        | JX572576        | JX517900        |
| <i>Euclea natalensis</i> subsp. <i>obovata</i> F.White            | Ericales     | Ebenaceae        | JX572577        | JX517787        |
| <i>Euclea pseudebenus</i> E.Mey. ex A.DC.                         | Ericales     | Ebenaceae        | JX572578        | JX517308        |
| <i>Euclea racemosa</i> L.                                         | Ericales     | Ebenaceae        | JX572579        | JX518155        |
| <i>Euclea racemosa</i> subsp. <i>daphnoides</i> (Hiern) F.White   | Ericales     | Ebenaceae        | JF265422        | JF270771        |
| <i>Euclea undulata</i> Thunb.                                     | Ericales     | Ebenaceae        | JQ025046        | JQ024962        |
| <i>Euclinia longiflora</i> Salisb.                                | Gentianales  | Rubiaceae        | KC628493        | KC627810        |
| <i>Eugenia capensis</i> (Eckl. & Zeyh.) Harv.                     | Myrtales     | Myrtaceae        | JX572580        | JX517357        |
| <i>Eugenia capensis</i> (Eckl. & Zeyh.) Sond. subsp. A            | Myrtales     | Myrtaceae        | KF147474        | KF147400        |
| <i>Eugenia capensis</i> subsp. <i>albanensis</i> (Sond.) F.White  | Myrtales     | Myrtaceae        | KF147473        | KF147399        |
| <i>Eugenia capensis</i> subsp. <i>natalitia</i> (Sond.) F.White   | Myrtales     | Myrtaceae        | JX572582        | JX517466        |
| <i>Eugenia capensis</i> subsp. <i>zeyheri</i> (Harv.) F.White     | Myrtales     | Myrtaceae        | JX572587        | JX517750        |
| <i>Eugenia erythrophylla</i> Strey                                | Myrtales     | Myrtaceae        | JX572581        | JX517830        |
| <i>Eugenia L.</i> sp. nov. C                                      | Myrtales     | Myrtaceae        | JX572583        | JX517627        |
| <i>Eugenia talbotii</i> Keay                                      | Myrtales     | Myrtaceae        | KC628646        | KC627918        |
| <i>Eugenia umtamvunensis</i> A.E.van Wyk                          | Myrtales     | Myrtaceae        | JX572584        | JX517784        |
| <i>Eugenia uniflora</i> L.                                        | Myrtales     | Myrtaceae        | -               | AF368207        |
| <i>Eugenia verdoorniae</i> A.E.van Wyk                            | Myrtales     | Myrtaceae        | JX572585        | JX517398        |
| <i>Eugenia woodii</i> Dummer                                      | Myrtales     | Myrtaceae        | JX572586        | JX518025        |
| <i>Eugenia zuluensis</i> Dummer                                   | Myrtales     | Myrtaceae        | JX572588        | JX517795        |
| <i>Eumorphia davyi</i> Bolus                                      | Asterales    | Asteraceae       | <b>KM894205</b> | <b>KM896883</b> |
| <i>Euphorbia cooperi</i> N.E.Br. ex A.Berger                      | Malpighiales | Euphorbiaceae    | JF265425        | JF270774        |
| <i>Euphorbia espinosa</i> Pax                                     | Malpighiales | Euphorbiaceae    | JF265426        | JF270775        |
| <i>Euphorbia guerichiana</i> Pax ex Engl.                         | Malpighiales | Euphorbiaceae    | JX572589        | JX517679        |
| <i>Euphorbia matabelensis</i> Pax                                 | Malpighiales | Euphorbiaceae    | JX572590        | JX517557        |

|                                                                    |              |               |                 |                 |
|--------------------------------------------------------------------|--------------|---------------|-----------------|-----------------|
| <i>Euphorbia rowlandii</i> R.A.Dyer                                | Malpighiales | Euphorbiaceae | JF265427        | JF270776        |
| <i>Euphorbia tirucalli</i> L.                                      | Malpighiales | Euphorbiaceae | JX572591        | JX518075        |
| <i>Euphorbia triangularis</i> Desf. ex A.Berger                    | Malpighiales | Euphorbiaceae | JX572592        | JX517682        |
| <i>Excoecaria bussei</i> (Pax) Pax                                 | Malpighiales | Euphorbiaceae | JX572593        | JX518133        |
| <i>Excoecaria simii</i> (Kuntze) Pax                               | Malpighiales | Euphorbiaceae | JX572594        | JX517636        |
| <i>Fadogia homblei</i> De Wild.                                    | Gentianales  | Rubiaceae     | KF147475        | KF147401        |
| <i>Fadogia tetraquetra</i> K.Schum. & K.Krause                     | Gentianales  | Rubiaceae     | JX572912        | JX518047        |
| <i>Fadogia triphylla</i> Baker                                     | Gentianales  | Rubiaceae     | KF147476        | KF147402        |
| <i>Fadogiella rogersii</i> (Wernham) Bridson                       | Gentianales  | Rubiaceae     | KF147477        | -               |
| <i>Fadogiella stigmatoloba</i> (K.Schum.) Robyns                   | Gentianales  | Rubiaceae     | -               | KF147403        |
| <i>Faidherbia albida</i> (Delile) A.Chev.                          | Fabales      | Fabaceae      | JF265429        | JF270778        |
| <i>Faurea galpinii</i> E.Phillips                                  | Proteales    | Proteaceae    | JX572595        | JX517907        |
| <i>Faurea macnaughtonii</i> E.Phillips                             | Proteales    | Proteaceae    | JX572596        | JX517418        |
| <i>Faurea rochetiana</i> (A.Rich.) Chiov. ex Pic.Serm.             | Proteales    | Proteaceae    | JX572597        | JX517828        |
| <i>Faurea rubriflora</i> Marner                                    | Proteales    | Proteaceae    | <b>KU568039</b> | <b>KX146227</b> |
| <i>Faurea saligna</i> Harv.                                        | Proteales    | Proteaceae    | JF265431        | JF270780        |
| <i>Fernandoa magnifica</i> Seem.                                   | Lamiales     | Bignoniaceae  | JX572598        | JX517318        |
| <i>Ficus abutilifolia</i> (Miq.) Miq.                              | Rosales      | Moraceae      | JX572599        | JX517731        |
| <i>Ficus bizanae</i> Hutch. & Burt Davy                            | Rosales      | Moraceae      | JX572600        | JX518182        |
| <i>Ficus burkei</i> (Miq.) Miq.                                    | Rosales      | Moraceae      | JF265432        | JF270781        |
| <i>Ficus burtt-davyi</i> Hutch.                                    | Rosales      | Moraceae      | -               | JX517875        |
| <i>Ficus bussei</i> Warb. ex Mildbr. & Burret                      | Rosales      | Moraceae      | JX573113        | JX970907        |
| <i>Ficus capreifolia</i> Delile                                    | Rosales      | Moraceae      | JX572601        | JX517811        |
| <i>Ficus cordata</i> subsp. <i>salicifolia</i> (Vahl) C.C.Berg     | Rosales      | Moraceae      | JX572609        | JX518207        |
| <i>Ficus craterostoma</i> Warb. ex Mildbr. & Burret                | Rosales      | Moraceae      | JX572602        | JX517933        |
| <i>Ficus exasperata</i> Vahl                                       | Rosales      | Moraceae      | <b>KU568083</b> | <b>KX146229</b> |
| <i>Ficus glumosa</i> Delile                                        | Rosales      | Moraceae      | JX572603        | JX517465        |
| <i>Ficus ilicina</i> (Sond.) Miq.                                  | Rosales      | Moraceae      | JX572604        | JX517393        |
| <i>Ficus ingens</i> (Miq.) Miq.                                    | Rosales      | Moraceae      | JF265434        | JF270782        |
| <i>Ficus lutea</i> Vahl                                            | Rosales      | Moraceae      | JX572605        | JX517686        |
| <i>Ficus mucoso</i> Welw. ex Ficalho                               | Rosales      | Moraceae      | <b>KU568155</b> | <b>KX146370</b> |
| <i>Ficus natalensis</i> Hochst.                                    | Rosales      | Moraceae      | KF147478        | KF147404        |
| <i>Ficus polita</i> Vahl                                           | Rosales      | Moraceae      | JX572607        | JX518117        |
| <i>Ficus pygmaea</i> Welw. ex Hiern                                | Rosales      | Moraceae      | JX572608        | JX517453        |
| <i>Ficus rokko</i> Warb. & Schweinf                                | Rosales      | Moraceae      | -               | JX517518        |
| <i>Ficus sansibarica</i> Warb.                                     | Rosales      | Moraceae      | KF147479        | KF147405        |
| <i>Ficus stuhlmannii</i> Warb.                                     | Rosales      | Moraceae      | JF265437        | JF270785        |
| <i>Ficus sur</i> Forssk.                                           | Rosales      | Moraceae      | JF265438        | JF270786        |
| <i>Ficus sycomorus</i> L.                                          | Rosales      | Moraceae      | JX572610        | JX518017        |
| <i>Ficus sycomorus</i> subsp. <i>gnaphalocarpa</i> (Miq.) C.C.Berg | Rosales      | Moraceae      | <b>KU568149</b> | -               |
| <i>Ficus tettensis</i> Hutch.                                      | Rosales      | Moraceae      | JX572611        | JX517998        |
| <i>Ficus thonningii</i> Blume                                      | Rosales      | Moraceae      | JX572606        | JX518112        |

|                                                                      |              |                  |                 |                 |
|----------------------------------------------------------------------|--------------|------------------|-----------------|-----------------|
| <i>Ficus tremula</i> Warb.                                           | Rosales      | Moraceae         | JX573114        | JX970900        |
| <i>Ficus trichopoda</i> Baker                                        | Rosales      | Moraceae         | JX572612        | JX517724        |
| <i>Filicium decipiens</i> (Wight & Arn.) Thwaites                    | Sapindales   | Sapindaceae      | AY724352        | AY724294        |
| <i>Flacourtia indica</i> (Burm. f.) Merr.                            | Malpighiales | Salicaceae       | JX572613        | JX518082        |
| <i>Flagellaria guineensis</i> Schumach.                              | Poales       | Flagellariaceae  | <b>KU568091</b> | <b>KX146220</b> |
| <i>Flueggea virosa</i> (Roxb. ex Willd.) Royle                       | Malpighiales | Euphorbiaceae    | JX572614        | JX517340        |
| <i>Fockea capensis</i> Endl.                                         | Gentianales  | Apocynaceae      | <b>KU568114</b> | <b>JX518200</b> |
| <i>Fockea comaru</i> (E.Mey.) N.E.Br.                                | Gentianales  | Apocynaceae      | <b>JX572615</b> | <b>KX146333</b> |
| <i>Fockea edulis</i> (Thunb.) K.Schum.                               | Gentianales  | Apocynaceae      | <b>KU568061</b> | <b>KX146313</b> |
| <i>Freylinia lanceolata</i> (L.) G.Don                               | Lamiales     | Scrophulariaceae | JX572616        | JX517908        |
| <i>Friesodielsia obovata</i> (Benth.) Verdc.                         | Magnoliales  | Annonaceae       | JX572617        | JX517635        |
| <i>Funtumia africana</i> (Benth.) Stapf                              | Gentianales  | Apocynaceae      | -               | EF456323        |
| <i>Gaertnera bieleri</i> (De Wild.) E.M.A.Petit                      | Gentianales  | Rubiaceae        | KC628615        | KC627897        |
| <i>Galpinia transvaalica</i> N.E.Br.                                 | Myrtales     | Lythraceae       | JF265443        | JF270791        |
| <i>Garcinia acutifolia</i> N.Robson                                  | Malpighiales | Clusiaceae       | <b>KU568027</b> | <b>KX146252</b> |
| <i>Garcinia conrauana</i> Engl.                                      | Malpighiales | Clusiaceae       | KC628310        | -               |
| <i>Garcinia epunctata</i> Stapf                                      | Malpighiales | Clusiaceae       | KC628029        | KC627468        |
| <i>Garcinia gerrardii</i> Harv. ex Sim                               | Malpighiales | Clusiaceae       | -               | JX517432        |
| <i>Garcinia gnetoides</i> Hutch. & Dalziel                           | Malpighiales | Clusiaceae       | KC627985        | KC627435        |
| <i>Garcinia kola</i> Heckel                                          | Malpighiales | Clusiaceae       | KC628604        | -               |
| <i>Garcinia livingstonei</i> T.Anderson                              | Malpighiales | Clusiaceae       | JX572619        | JX517696        |
| <i>Garcinia lucida</i> Vesque                                        | Malpighiales | Clusiaceae       | KC628419        | -               |
| <i>Garcinia mannii</i> Oliv.                                         | Malpighiales | Clusiaceae       | KC628276        | -               |
| <i>Garcinia ovalifolia</i> Oliv.                                     | Malpighiales | Clusiaceae       | KC628269        | -               |
| <i>Garcinia punctata</i> Oliv.                                       | Malpighiales | Clusiaceae       | KC628235        | KC627616        |
| <i>Garcinia smeathmannii</i> (Planch. & Triana) Oliv.                | Malpighiales | Clusiaceae       | KC628311        | KC627672        |
| <i>Gardenia cornuta</i> Hemsl.                                       | Gentianales  | Rubiaceae        | JX572620        | JX517901        |
| <i>Gardenia resiniflua</i> Hiern                                     | Gentianales  | Rubiaceae        | JX572621        | JX517583        |
| <i>Gardenia subacaulis</i> Stapf & Hutch.                            | Gentianales  | Rubiaceae        | KF147480        | KF147406        |
| <i>Gardenia ternifolia</i> Schumach. & Thonn.                        | Gentianales  | Rubiaceae        | JX572622        | JX517388        |
| <i>Gardenia thunbergia</i> Thunb.                                    | Gentianales  | Rubiaceae        | JX572623        | JX517827        |
| <i>Gardenia volkensii</i> K.Schum.                                   | Gentianales  | Rubiaceae        | JX572624        | JX518233        |
| <i>Gerrardina foliosa</i> Oliv.                                      | Huertales    | Gerrardinaceae   | JX572625        | JX517543        |
| <i>Gilbertiodendron demonstrans</i> (Baill.) J.Léonard               | Fabales      | Fabaceae         | KC628266        | KC627638        |
| <i>Glenniea africana</i> (Radlk.) Leenh.                             | Sapindales   | Sapindaceae      | JX572627        | JX518034        |
| <i>Glossocalyx brevipes</i> Benth.                                   | Laurales     | Siparunaceae     | KC628671        | KC627937        |
| <i>Gloveria integrifolia</i> (L.f.) Jorandaan                        | Celastrales  | Celastraceae     | JX572628        | JX518163        |
| <i>Glyphaea tomentosa</i> Mast.                                      | Malvales     | Malvaceae        | JX572629        | JX517593        |
| <i>Gonioma kamassi</i> E.Mey.                                        | Gentianales  | Apocynaceae      | JX572630        | JX517633        |
| <i>Gossypium herbaceum</i> subsp. <i>africanum</i> (G.Watt) Vollesen | Malvales     | Malvaceae        | JX572631        | JX517350        |
| <i>Grewia bicolor</i> Juss.                                          | Malvales     | Malvaceae        | JX572633        | JX518121        |
| <i>Grewia caffra</i> Meisn.                                          | Malvales     | Malvaceae        | JX572634        | JX517589        |

|                                                                               |             |              |                 |                 |
|-------------------------------------------------------------------------------|-------------|--------------|-----------------|-----------------|
| <i>Grewia falcistipula</i> K.Schum.                                           | Malvales    | Malvaceae    | <b>KU568108</b> | <b>KX146327</b> |
| <i>Grewia flava</i> DC.                                                       | Malvales    | Malvaceae    | <b>KM894221</b> | -               |
| <i>Grewia flavescens</i> Juss.                                                | Malvales    | Malvaceae    | JX572635        | JX517463        |
| <i>Grewia gracillima</i> Wild                                                 | Malvales    | Malvaceae    | JF265451        | JF270798        |
| <i>Grewia hexamita</i> Burret                                                 | Malvales    | Malvaceae    | JF265452        | JF270799        |
| <i>Grewia inaequilatera</i> Garcke                                            | Malvales    | Malvaceae    | JF265453        | JF270800        |
| <i>Grewia lasiocarpa</i> E.Mey. ex Harv.                                      | Malvales    | Malvaceae    | JX572636        | JX518043        |
| <i>Grewia lepidopetala</i> Garcke                                             | Malvales    | Malvaceae    | JX572637        | JX517945        |
| <i>Grewia micrantha</i> Bojer                                                 | Malvales    | Malvaceae    | JX572638        | JX517762        |
| <i>Grewia microcarpa</i> K.Schum.                                             | Malvales    | Malvaceae    | JX572639        | JX517607        |
| <i>Grewia microthyrsa</i> K.Schum. ex Burret                                  | Malvales    | Malvaceae    | JX572640        | JX517514        |
| <i>Grewia monticola</i> Sond.                                                 | Malvales    | Malvaceae    | JX572641        | JX517425        |
| <i>Grewia occidentalis</i> L.                                                 | Malvales    | Malvaceae    | JX572642        | JX517699        |
| <i>Grewia pondoensis</i> Burret                                               | Malvales    | Malvaceae    | JX572643        | JX518171        |
| <i>Grewia stolzii</i> Ulbr.                                                   | Malvales    | Malvaceae    | <b>KU568080</b> | <b>KX146292</b> |
| <i>Grewia sulcata</i> Mast.                                                   | Malvales    | Malvaceae    | JX572644        | JX517675        |
| <i>Grewia transzambesica</i> Wild                                             | Malvales    | Malvaceae    | JX572645        | JX517601        |
| <i>Grewia vernicosa</i> Schinz                                                | Malvales    | Malvaceae    | JX572632        | JX518099        |
| <i>Grewia villosa</i> Willd.                                                  | Malvales    | Malvaceae    | JX572646        | JX517723        |
| <i>Greyia sutherlandii</i> Hook. & Harv.                                      | Geraniales  | Meliantaceae | JX572648        | JX518196        |
| <i>Guarea thompsonii</i> Sprague & Hutch.                                     | Sapindales  | Meliaceae    | KC628202        | KC627594        |
| <i>Guettarda speciosa</i> L.                                                  | Gentianales | Rubiaceae    | JX572649        | JX517544        |
| <i>Guibourtia coleosperma</i> (Benth.) Leonard                                | Fabales     | Fabaceae     | JX572650        | JX518076        |
| <i>Guibourtia conjugata</i> (Bolle) J.Leonard                                 | Fabales     | Fabaceae     | JF265457        | JF270804        |
| <i>Guibourtia schliebenii</i> (Harms) J.Leonard                               | Fabales     | Fabaceae     | <b>KU568042</b> | -               |
| <i>Guibourtia sousae</i> J.Leonard                                            | Fabales     | Fabaceae     | <b>KU568033</b> | <b>KX146258</b> |
| <i>Gymnosporia arenicola</i> Jordaan                                          | Celastrales | Celastraceae | <b>KM894229</b> | <b>KM896905</b> |
| <i>Gymnosporia bachmannii</i> Loes.                                           | Celastrales | Celastraceae | JX572652        | JX518062        |
| <i>Gymnosporia buxifolia</i> (L.) Szyszyl.                                    | Celastrales | Celastraceae | JX572653        | JX517419        |
| <i>Gymnosporia capitata</i> (E.Mey. ex Sond.) Loes.                           | Celastrales | Celastraceae | <b>KU567999</b> | <b>KX146230</b> |
| <i>Gymnosporia devenishii</i> Jordaan                                         | Celastrales | Celastraceae | JX572654        | JX517493        |
| <i>Gymnosporia glaucophylla</i> Jordaan                                       | Celastrales | Celastraceae | <b>KU568053</b> | <b>KX146276</b> |
| <i>Gymnosporia grandifolia</i> (Davison) Jordaan                              | Celastrales | Celastraceae | <b>KM894265</b> | <b>KM896935</b> |
| <i>Gymnosporia harveyana</i> Loes.                                            | Celastrales | Celastraceae | JX572655        | JX518059        |
| <i>Gymnosporia heterophylla</i> (Eckl. & Zeyh.) Loes.                         | Celastrales | Celastraceae | JF265458        | JF270805        |
| <i>Gymnosporia maranguensis</i> (Loes.) Loes.                                 | Celastrales | Celastraceae | JF265459        | JF270806        |
| <i>Gymnosporia markwardii</i> Jordaan                                         | Celastrales | Celastraceae | <b>KU568098</b> | <b>KX146319</b> |
| <i>Gymnosporia mossambicensis</i> (Klotzsch) Loes.                            | Celastrales | Celastraceae | JX572656        | JX518105        |
| <i>Gymnosporia nemorosa</i> (Eckl. & Zeyh.) Szyszyl.                          | Celastrales | Celastraceae | JX572657        | JX517324        |
| <i>Gymnosporia oxycarpa</i> (N.Robson) Jordaan                                | Celastrales | Celastraceae | JX572658        | JX517648        |
| <i>Gymnosporia polyacantha</i> (Sond.) Szyszyl.                               | Celastrales | Celastraceae | JX572659        | JX517462        |
| <i>Gymnosporia polyacanthus</i> subsp. <i>vacciniifolia</i> (Conrath) Jordaan | Celastrales | Celastraceae | <b>KU568120</b> | <b>KX146338</b> |

|                                                                              |              |                  |                 |                 |
|------------------------------------------------------------------------------|--------------|------------------|-----------------|-----------------|
| <i>Gymnosporia pubescens</i> (N.Robson) Jordaan                              | Celastrales  | Celastraceae     | JF265461        | JF270808        |
| <i>Gymnosporia putterlickioides</i> Loes.                                    | Celastrales  | Celastraceae     | JX572660        | JX517707        |
| <i>Gymnosporia rubra</i> (Harv.) Loes.                                       | Celastrales  | Celastraceae     | <b>KU568106</b> | <b>KX146325</b> |
| <i>Gymnosporia senegalensis</i> (Lam.) Loes.                                 | Celastrales  | Celastraceae     | JX572661        | JX517756        |
| <i>Gymnosporia szyszyłowiczii</i>                                            | Celastrales  | Celastraceae     | <b>KU568122</b> | <b>KX146340</b> |
| <i>Gymnosporia tenuispina</i> (Sond.) Szyszyl.                               | Celastrales  | Celastraceae     | -               | JX970906        |
| <i>Gyrocarpus americanus</i> Jacq.                                           | Lurales      | Hernandiaceae    | JF265465        | JF270812        |
| <i>Haematoxylum</i> L.                                                       | Fabales      | Fabaceae         | AY904386        | AY386905        |
| <i>Hallea ledermannii</i> (K.Krause) Verdc.                                  | Gentianales  | Rubiaceae        | KC628077        | KC627503        |
| <i>Halleria lucida</i> L.                                                    | Lamiales     | Scrophulariaceae | JX572665        | JX517441        |
| <i>Haplocoelum foliolosum</i> (Hiern) Bullock                                | Sapindales   | Sapindaceae      | JX572666        | JX517599        |
| <i>Harpephyllum caffrum</i> Bernh. ex C.Krauss                               | Sapindales   | Anacardiaceae    | JF265467        | JF270814        |
| <i>Heeria argentea</i> Meisn.                                                | Sapindales   | Anacardiaceae    | JX572667        | JX518129        |
| <i>Heinsia crinita</i> subsp. <i>parviflora</i> (K.Schum. & K.Krause) Verdc. | Gentianales  | Rubiaceae        | JF265467        | JF270814        |
| <i>Heisteria parvifolia</i> Sm.                                              | Santalales   | Olacaceae        | KC628018        | KC627461        |
| <i>Helinus integrifolius</i> (Lam.) Kuntze                                   | Rosales      | Rhamnaceae       | JX572668        | JX518160        |
| <i>Heritiera littoralis</i> Aiton                                            | Malvales     | Malvaceae        | -               | AY321181        |
| <i>Heteromorpha arborescens</i> Cham. & Schldl.                              | Apiales      | Apiaceae         | JX572669        | JX517406        |
| <i>Heteromorpha arborescens</i> var. <i>frutescens</i> P. Winter             | Apiales      | Apiaceae         | JX572670        | JX517330        |
| <i>Heteromorpha involucrata</i> Conrath                                      | Apiales      | Apiaceae         | <b>KU568076</b> | <b>KX146298</b> |
| <i>Heteropyxis natalensis</i> Harv.                                          | Myrtales     | Myrtaceae        | JX572671        | JX518023        |
| <i>Heterosamara galpinii</i> (Hook.f.) Paiva                                 | Fabales      | Polygalaceae     | <b>KU568073</b> | <b>KX146295</b> |
| <i>Heterotis canescens</i> (E. Mey. ex Graham) Jacq.-Fél.                    | Myrtales     | Melastomataceae  | KF147468        | KF147391        |
| <i>Hexalobus monopetalus</i> (A.Rich.) Engl. & Diels                         | Magnoliales  | Annonaceae       | JX572672        | JX517754        |
| <i>Heywoodia lucens</i> Sim                                                  | Malpighiales | Euphorbiaceae    | JX572673        | JX518107        |
| <i>Hibiscus calyphyllus</i> Cav.                                             | Malvales     | Malvaceae        | JX572674        | JX517307        |
| <i>Hibiscus micranthus</i> L.f.                                              | Malvales     | Malvaceae        | JX572675        | JX518190        |
| <i>Hibiscus surattensis</i> L.                                               | Malvales     | Malvaceae        | <b>KU567993</b> | -               |
| <i>Hibiscus tiliaceus</i> L.                                                 | Malvales     | Malvaceae        | JX572676        | JX517796        |
| <i>Hippobromus pauciflorus</i> Radlk.                                        | Sapindales   | Sapindaceae      | JX572677        | JX518197        |
| <i>Hippocratea crenata</i> K. Schum. & Loes.                                 | Celastrales  | Celastraceae     | JX572678        | JX517629        |
| <i>Hippocratea indica</i> Willd.                                             | Celastrales  | Celastraceae     | JX572921        | JX517591        |
| <i>Hirtella zanzibarica</i> Oliv.                                            | Malpighiales | Chrysobalanaceae | JX572679        | JX518073        |
| <i>Holarrhena pubescens</i> Wall.                                            | Gentianales  | Apocynaceae      | JX572680        | JX517447        |
| <i>Homalium abdessammadii</i> Asch. & Schweinf.                              | Malpighiales | Salicaceae       | <b>KU568119</b> | <b>KX146337</b> |
| <i>Homalium africanum</i> (Hook.f.) Benth.                                   | Malpighiales | Salicaceae       | KC628542        | KC627844        |
| <i>Homalium dentatum</i> Warb.                                               | Malpighiales | Salicaceae       | JX572681        | JX517416        |
| <i>Homalium letestui</i> Pellegr.                                            | Malpighiales | Salicaceae       | KC628675        | KC627940        |
| <i>Homalium longistylum</i> Mast.                                            | Malpighiales | Salicaceae       | KC628309        | KC627671        |
| <i>Homalium rufescens</i> Benth.                                             | Malpighiales | Salicaceae       | JX572682        | JX517770        |
| <i>Hugonia busseana</i> Engl.                                                | Malpighiales | Linaceae         | JX572683        | JX518087        |
| <i>Hugonia orientalis</i> Engl.                                              | Malpighiales | Linaceae         | JF265478        | JF270825        |

|                                                              |              |                |                 |                 |
|--------------------------------------------------------------|--------------|----------------|-----------------|-----------------|
| <i>Hunteria umbellata</i> (K.Schum.) Hallier f.              | Gentianales  | Apocynaceae    | KC628436        | KC627769        |
| <i>Hunteria zeylanica</i> (Retz.) Gardner ex Thwaites        | Gentianales  | Apocynaceae    | -               | JX517717        |
| <i>Hyaenanche globosa</i> (Gaertn.) Lamb. & Vahl             | Malpighiales | Euphorbiaceae  | JX572684        | JX905949        |
| <i>Hymenaea verrucosa</i> Gaertn.                            | Fabales      | Fabaceae       | L08480          | EU361974        |
| <i>Hymenocardia acida</i> Tul.                               | Malpighiales | Euphorbiaceae  | <b>KU567991</b> | -               |
| <i>Hymenocardia ulmoides</i> Oliv.                           | Malpighiales | Euphorbiaceae  | JX572685        | JX517929        |
| <i>Hymenodictyon floribundum</i> (Hochst. & Steud.) B.L.Rob. | Gentianales  | Rubiaceae      | AY538488        | AY538392        |
| <i>Hymenodictyon parvifolium</i> Oliv.                       | Gentianales  | Rubiaceae      | JX572686        | JX517708        |
| <i>Hymenostegia afzelii</i> (Oliv.) Harms                    | Fabales      | Fabaceae       | KC628368        | KC627718        |
| <i>Hymenostegia bakeriana</i> Hutch. & Dalziel               | Fabales      | Fabaceae       | KC628146        | KC627546        |
| <i>Hymenostegia floribunda</i> (Benth.) Harms                | Fabales      | Fabaceae       | KC628522        | KC627831        |
| <i>Hymenostegia klainei</i> Pierre ex Pellegr.               | Fabales      | Fabaceae       | KC628057        | KC627486        |
| <i>Hymenostegia ngounyensis</i> Pellegr.                     | Fabales      | Fabaceae       | KC628174        | KC627569        |
| <i>Hyperacanthus amoenus</i> (Sims) Bridson                  | Gentianales  | Rubiaceae      | JX572687        | JX517662        |
| <i>Hyperacanthus microphyllus</i> (K.Schum.) Bridson         | Gentianales  | Rubiaceae      | -               | <b>KX146342</b> |
| <i>Hypericum revolutum</i> Vahl                              | Malpighiales | Hypericaceae   | <b>KM894203</b> | -               |
| <i>Hypericum roeperianum</i> Schimp. ex A.Rich.              | Malpighiales | Hypericaceae   | <b>KM894248</b> | -               |
| <i>Hyphaene coriacea</i> Gaertn.                             | Arecales     | Areaceae       | JX572688        | JX518101        |
| <i>Hyphaene petersiana</i> Klotzsch ex Mart.                 | Arecales     | Areaceae       | JX572689        | JX517767        |
| <i>Hypocalyptus sophoroides</i> (P.J.Bergius) Baill.         | Fabales      | Fabaceae       | JX572690        | JX518069        |
| <i>Hypodaphnis zenkeri</i> (Engl.) Stapf                     | Laurales     | Lauraceae      | KC628659        | KC627928        |
| <i>Icuria dunensis</i> Wieringa                              | Fabales      | Fabaceae       | <b>KU568147</b> | <b>KX146362</b> |
| <i>Ilex mitis</i> (L.) Radlk.                                | Aquifoliales | Aquifoliaceae  | <b>KU568082</b> | <b>KX146284</b> |
| <i>Indigofera arrecta</i> A.Rich.                            | Fabales      | Fabaceae       | <b>KM894230</b> | <b>KM896906</b> |
| <i>Indigofera cytisoides</i> Thunb.                          | Fabales      | Fabaceae       | <b>KM894218</b> | <b>KM896895</b> |
| <i>Indigofera filifolia</i> Thunb.                           | Fabales      | Fabaceae       | JX572691        | JX517626        |
| <i>Indigofera frutescens</i> L.f.                            | Fabales      | Fabaceae       | JX572692        | JX517595        |
| <i>Indigofera fulgens</i> Baker                              | Fabales      | Fabaceae       | JX572693        | JX518024        |
| <i>Indigofera natalensis</i> Bolus                           | Fabales      | Fabaceae       | JX572694        | JX518009        |
| <i>Indigofera rhynchocarpa</i> Baker                         | Fabales      | Fabaceae       | JX905964        | JX905943        |
| <i>Indigofera sanguinea</i> N.E.Br.                          | Fabales      | Fabaceae       | KF147481        | KF147407        |
| <i>Indigofera suffruticosa</i> Mill.                         | Fabales      | Fabaceae       | -               | AF142697        |
| <i>Indigofera tinctoria</i> L.                               | Fabales      | Fabaceae       | JF265485        | JF270832        |
| <i>Inhambanella henriquezii</i> (Engl. & Warb.) Dubard       | Ericales     | Sapotaceae     | JX572695        | JX517677        |
| <i>Ipomoea fistulosa</i> Mart. ex Choisy                     | Solanales    | Convolvulaceae | GU135243        | GU135080        |
| <i>Irvingia gabonensis</i> (Aubry-Lecomte ex O'Rorke) Bai    | Malpighiales | Irvingiaceae   | KC627956        | KC627413        |
| <i>Irvingia robur</i> Mildbr.                                | Malpighiales | Irvingiaceae   | KC628538        | KC627840        |
| <i>Isoblerlinia angolensis</i> (Benth.) Hoyle & Brenan       | Fabales      | Fabaceae       | <b>KU568126</b> | <b>KX146343</b> |
| <i>Isolona campanulata</i> Engl. & Diels                     | Magnoliales  | Annonaceae     | KC628204        | KC627596        |
| <i>Isolona thonneri</i> (De Wild & Th. Dur.) Engl. & Diels   | Magnoliales  | Annonaceae     | KC628041        | KC627473        |
| <i>Itea</i> L.                                               | Saxifragales | Iteaceae       | -               | HQ415356        |

|                                                       |              |               |                 |                 |
|-------------------------------------------------------|--------------|---------------|-----------------|-----------------|
| <i>Ixora hippoperifera</i> Bremek.                    | Gentianales  | Rubiaceae     | KC628561        | KC627857        |
| <i>Ixora narcissodora</i> K.Schum.                    | Gentianales  | Rubiaceae     | JX572696        | JX517349        |
| <i>Jasminum fluminense</i> Vell.                      | Lamiales     | Oleaceae      | JQ025057        | JQ024970        |
| <i>Jasminum multipartitum</i> Hochst.                 | Lamiales     | Oleaceae      | JX572698        | JX517738        |
| <i>Jasminum quinatum</i> Schinz                       | Lamiales     | Oleaceae      | KF147482        | KF147408        |
| <i>Jasminum stenolobum</i> Rolfe                      | Lamiales     | Oleaceae      | JX572699        | JX517716        |
| <i>Jollydora duparquetiana</i> (Baill.) Pierre        | Oxalidales   | Connaraceae   | KC628606        | KC627891        |
| <i>Jollydora glandulosa</i> G.Schellenb.              | Oxalidales   | Connaraceae   | KC628028        | KC627467        |
| <i>Jubaeopsis caffra</i> Becc.                        | Arecales     | Areaceae      | AJ829876        | AM114633        |
| <i>Julbernardia globiflora</i> (Benth.) Troupin       | Fabales      | Fabaceae      | JX572701        | JX517829        |
| <i>Julbernardia paniculata</i> (Benth.) Troupin       | Fabales      | Fabaceae      | <b>KU568145</b> | <b>KX146360</b> |
| <i>Justicia aconitiflora</i> (A.Meeuse) Cubey         | Lamiales     | Acanthaceae   | JF265402        | JF270752        |
| <i>Justicia adhatodooides</i> (Nees) V.A.W.Graham     | Lamiales     | Acanthaceae   | JF265403        | JF270753        |
| <i>Justicia campylostemon</i> T. Anders.              | Lamiales     | Acanthaceae   | JX572702        | JX518170        |
| <i>Karomia speciosa</i> (Hutch. & Corbishley) R.Fern. | Lamiales     | Lamiaceae     | JF265489        | JF270836        |
| <i>Karomia tettensis</i> (Klotzsch) R.Fern.           | Lamiales     | Lamiaceae     | <b>KU568133</b> | <b>KX146348</b> |
| <i>Keetia gueinzii</i> (Sond.) Bridson                | Gentianales  | Rubiaceae     | JX572703        | JX518184        |
| <i>Keetia venosa</i> (Oliv.) Bridson                  | Gentianales  | Rubiaceae     | <b>KU568116</b> | -               |
| <i>Khaya anotheca</i> (Welw.) C.DC.                   | Sapindales   | Meliaceae     | JX572704        | JX517573        |
| <i>Kigelia africana</i> (Lam.) Benth.                 | Lamiales     | Bignoniaceae  | JX572705        | JX517880        |
| <i>Kiggelaria africana</i> L.                         | Malpighiales | Salicaceae    | JX572706        | JX518019        |
| <i>Kirkia acuminata</i> Oliv.                         | Sapindales   | Kirkiaceae    | JX572707        | JX517399        |
| <i>Kirkia wilmsii</i> Engl.                           | Sapindales   | Kirkiaceae    | JF265493        | JF270840        |
| <i>Klaineanthus gabonii</i> Pierre                    | Malpighiales | Euphorbiaceae | KC628583        | KC627874        |
| <i>Kraussia floribunda</i> Harv.                      | Gentianales  | Rubiaceae     | JX572708        | JX517560        |
| <i>Laccodiscus ferrugineus</i> (Baker) Radlk.         | Sapindales   | Sapindaceae   | KC628631        | KC627908        |
| <i>Lachnostylis bilocularis</i> R.A.Dyer              | Malpighiales | Euphorbiaceae | -               | AY552431        |
| <i>Lagynias dryadum</i> (S.Moore) Robyns              | Gentianales  | Rubiaceae     | JF265495        | JF270842        |
| <i>Landolphia kirkii</i> Dyer                         | Gentianales  | Apocynaceae   | JX905972        | JX905958        |
| <i>Lannea antiscorbutica</i> (Hiern) Engl.            | Sapindales   | Anacardiaceae | JX572709        | JX518185        |
| <i>Lannea discolor</i> (Sond.) Engl.                  | Sapindales   | Anacardiaceae | JF265496        | JF270843        |
| <i>Lannea edulis</i> (Sond.) Engl.                    | Sapindales   | Anacardiaceae | JX572710        | JX518111        |
| <i>Lannea schimperi</i> (Hochst. ex A.Rich.) Engl.    | Sapindales   | Anacardiaceae | <b>KU567987</b> | <b>KX146220</b> |
| <i>Lannea schweinfurthii</i> (Engl.) Engl.            | Sapindales   | Anacardiaceae | JX572711        | JX517613        |
| <i>Lantana rugosa</i> Thunb.                          | Lamiales     | Verbenaceae   | JX572712        | JX517746        |
| <i>Lasianthera africana</i> P.Beauv.                  | Aquifoliales | Stemonuraceae | KC628214        | KC627605        |
| <i>Lasiiodiscus pervillei</i> Baill.                  | Rosales      | Rhamnaceae    | JX572713        | JX517978        |
| <i>Lauraphyllus capensis</i> Thunb.                   | Sapindales   | Anacardiaceae | JX572714        | JX517726        |
| <i>Lebeckia sericea</i> Thunb.                        | Fabales      | Fabaceae      | EU347924        | GQ246144        |
| <i>Lecaniodiscus fraxinifolius</i> Baker              | Sapindales   | Sapindaceae   | JX572715        | JX518177        |

|                                                                     |              |                   |                 |                 |
|---------------------------------------------------------------------|--------------|-------------------|-----------------|-----------------|
| <i>Lecomtedoxa klaineana</i> (Pierre ex Engl.) Dubard               | Ericales     | Sapotaceae        | KC628295        | KC627661        |
| <i>Leonotis leonurus</i> (L.) R.Br.                                 | Lamiales     | Lamiaceae         | JQ025060        | JQ024972        |
| <i>Lepisanthes senegalensis</i> (Poir.) Leenh.                      | Sapindales   | Sapindaceae       | -               | EU720654        |
| <i>Leptactina benguelensis</i> (Welw. ex Benth. & Hook.f.) R.D.Good | Gentianales  | Rubiaceae         | KF147483        | KF147409        |
| <i>Leptactina delagoensis</i> K.Schum.                              | Gentianales  | Rubiaceae         | JF265502        | JF270849        |
| <i>Leptactina epinyctios</i> Bullock ex Verdc.                      | Gentianales  | Rubiaceae         | <b>KU568054</b> | <b>KX146277</b> |
| <i>Leptaulus daphnoides</i> Benth.                                  | Aquifoliales | Cardiopteridaceae | KC628500        | KC627815        |
| <i>Leptonychia echinocarpa</i> K.Schum.                             | Malvales     | Malvaceae         | KC628496        | KC627813        |
| <i>Leptonychia pallida</i> K.Schum.                                 | Malvales     | Malvaceae         | KC628616        | KC627898        |
| <i>Leucadendron arcuatum</i> I.A. Williams                          | Proteales    | Proteaceae        | -               | KM896926        |
| <i>Leucadendron argenteum</i> (L.) R. Br.                           | Proteales    | Proteaceae        | JX572716        | JX517459        |
| <i>Leucadendron brunioides</i> Meisn.                               | Proteales    | Proteaceae        | KM894216        | KM896893        |
| <i>Leucadendron cinereum</i> R. Br.                                 | Proteales    | Proteaceae        | KM894268        | KM896938        |
| <i>Leucadendron coniferum</i> Meisn.                                | Proteales    | Proteaceae        | JX572717        | JX517657        |
| <i>Leucadendron corymbosum</i> P.J. Bergius                         | Proteales    | Proteaceae        | KM894270        | KM896941        |
| <i>Leucadendron dregei</i> E. Mey. Ex Meisn.                        | Proteales    | Proteaceae        | KM894255        | KM896925        |
| <i>Leucadendron dubium</i> E. Phillips & Hutch.                     | Proteales    | Proteaceae        | KM894256        | KM896927        |
| <i>Leucadendron elimense</i> E. Phillips                            | Proteales    | Proteaceae        | KM894211        | KM896888        |
| <i>Leucadendron floridum</i> R. Br.                                 | Proteales    | Proteaceae        | KM894264        | KM896934        |
| <i>Leucadendron foedum</i> I.J. Williams                            | Proteales    | Proteaceae        | KM894249        | KM896919        |
| <i>Leucadendron galpinii</i> E. Phillips & Hutch.                   | Proteales    | Proteaceae        | JX572718        | JX517879        |
| <i>Leucadendron gandogerii</i> Schinz ex Gand.                      | Proteales    | Proteaceae        | KP110352        | -               |
| <i>Leucadendron glaberrimum</i> Compton                             | Proteales    | Proteaceae        | KM894266        | KM896936        |
| <i>Leucadendron laureolum</i> Fourc.                                | Proteales    | Proteaceae        | KM894267        | KM896937        |
| <i>Leucadendron levisanus</i> P.J. Bergius                          | Proteales    | Proteaceae        | KM894271        | KM896942        |
| <i>Leucadendron loranthifolium</i> I.A. Williams                    | Proteales    | Proteaceae        | KM894227        | KM896903        |
| <i>Leucadendron macowanii</i> E. Phillips                           | Proteales    | Proteaceae        | JX572719        | JX518193        |
| <i>Leucadendron microcephalum</i> Gand. & Schinz                    | Proteales    | Proteaceae        | KM894225        | KM896901        |
| <i>Leucadendron nitidum</i> H. Buek ex Meisn.                       | Proteales    | Proteaceae        | KM894246        | KM896917        |
| <i>Leucadendron pubescens</i> R. Br.                                | Proteales    | Proteaceae        | JX572720        | JX517455        |
| <i>Leucadendron pubibracteolatum</i> I.A. Williams                  | Proteales    | Proteaceae        | KM894244        | KM896915        |
| <i>Leucadendron remotum</i> I.J. Williams                           | Proteales    | Proteaceae        | KM894226        | KM896902        |
| <i>Leucadendron rubrum</i> Burm. f.                                 | Proteales    | Proteaceae        | JX572721        | JX518007        |
| <i>Leucadendron salicifolium</i> I.A. Williams                      | Proteales    | Proteaceae        | JX572722        | JX518063        |
| <i>Leucadendron salignum</i> R. Br.                                 | Proteales    | Proteaceae        | KP110353        | KP110092        |
| <i>Leucadendron spissifolium</i> I.J. Williams                      | Proteales    | Proteaceae        | KP110354        | KP110093        |
| <i>Leucadendron strobilinum</i> Druce                               | Proteales    | Proteaceae        | JX572723        | JX517923        |
| <i>Leucadendron tinctum</i> I.J. Williams                           | Proteales    | Proteaceae        | KP110355        | KP110094        |
| <i>Leucadendron tradouwense</i> I.A. Williams                       | Proteales    | Proteaceae        | KM894254        | KM896924        |
| <i>Leucadendron uliginosum</i> R. Br.                               | Proteales    | Proteaceae        | -               | KM896940        |
| <i>Leucadendron verticillatum</i> Meisn.                            | Proteales    | Proteaceae        | KM894220        | KM896897        |
| <i>Leucadendron xanthoconus</i> K. Schum.                           | Proteales    | Proteaceae        | KM894250        | KM896920        |

|                                                                            |              |               |                 |                 |
|----------------------------------------------------------------------------|--------------|---------------|-----------------|-----------------|
| <i>Leucosidea sericea</i> Eckl. & Zeyh.                                    | Rosales      | Rosaceae      | JX572725        | JX518044        |
| <i>Leucospermum calligerum</i> Rourke                                      | Proteales    | Proteaceae    | <b>KM894241</b> | <b>KM896913</b> |
| <i>Leucospermum conocarpodendron</i> L.                                    | Proteales    | Proteaceae    | -               | JX518219        |
| <i>Leucospermum conocarpodendron</i> subsp. <i>viridum</i> Rourke          | Proteales    | Proteaceae    | JX572726        | JX517516        |
| <i>Leucospermum cuneiforme</i> Rourke                                      | Proteales    | Proteaceae    | JX572727        | JX517928        |
| <i>Leucospermum gerrardii</i> Stapf                                        | Proteales    | Proteaceae    | JX572728        | JX517341        |
| <i>Leucospermum hypophyllocarpodendron</i> (L.) Druce                      | Proteales    | Proteaceae    | <b>KM894243</b> | <b>KM896914</b> |
| <i>Leucospermum mundii</i> Meisn.                                          | Proteales    | Proteaceae    | KP110356        | -               |
| <i>Leucospermum oleaeifolium</i> R. Br.                                    | Proteales    | Proteaceae    | <b>KM894238</b> | <b>KM896911</b> |
| <i>Leucospermum rodolentum</i> Rourke                                      | Proteales    | Proteaceae    | JX572729        | JX518225        |
| <i>Leucospermum saxosum</i> S.Moore                                        | Proteales    | Proteaceae    | KF227398        | KF227399        |
| <i>Leucospermum tomentosum</i> R. Br.                                      | Proteales    | Proteaceae    | JQ412379        | JQ412256        |
| <i>Liparia hirsuta</i> Thunb.                                              | Fabales      | Fabaceae      | JX572732        | JX517359        |
| <i>Liparia myrtifolia</i> Thunb.                                           | Fabales      | Fabaceae      | JX572733        | JX517632        |
| <i>Liparia racemosa</i> A.L.Schutte                                        | Fabales      | Fabaceae      | <b>KM894242</b> | -               |
| <i>Liparia rafnioides</i> A.L.Schutte                                      | Fabales      | Fabaceae      | JX572734        | JX517668        |
| <i>Liparia vestita</i> Thunb.                                              | Fabales      | Fabaceae      | <b>KM894247</b> | <b>KM896918</b> |
| <i>Lippia javanica</i> (Burm.f.) Spreng.                                   | Lamiales     | Verbenaceae   | JX572735        | JX517480        |
| <i>Lopholaena coriifolia</i> (Sond.) E.Phillips & C.A.Sm.                  | Asterales    | Asteraceae    | JX572736        | JX517496        |
| <i>Lopholaena disticha</i> (N.E.Br.) S.Moore                               | Asterales    | Asteraceae    | KF147484        | KF147410        |
| <i>Loxostylis alata</i> Spreng. ex Rchb.                                   | Sapindales   | Anacardiaceae | JX572737        | JX517988        |
| <i>Ludia mauritiana</i> J.F. Gmel.                                         | Malpighiales | Salicaceae    | <b>KU568028</b> | <b>KX146253</b> |
| <i>Ludwigia octovalvis</i> (Jacq.) P.H.Raven                               | Myrtales     | Onagraceae    | JF265505        | JX517844        |
| <i>Lumnitzera racemosa</i> Willd.                                          | Myrtales     | Combretaceae  | JX572738        | JX517488        |
| <i>Lycium afrum</i> L.                                                     | Solanales    | Solanaceae    | JQ412384        | JQ412259        |
| <i>Lycium cinereum</i> Thunb.                                              | Solanales    | Solanaceae    | -               | AB036623        |
| <i>Lycium ferocissimum</i> Miers                                           | Solanales    | Solanaceae    | JX572739        | JX517342        |
| <i>Lycium oxycarpum</i> Dunal                                              | Solanales    | Solanaceae    | JX572740        | JX517868        |
| <i>Lycium schizocalyx</i> C.H.Wright                                       | Solanales    | Solanaceae    | -               | AB036622        |
| <i>Lycium villosum</i> Schinz                                              | Solanales    | Solanaceae    | -               | AB036624        |
| <i>Lydenburgia cassinoidea</i> N. Robson                                   | Celastrales  | Celastraceae  | -               | DQ217548        |
| <i>Macaranga capensis</i> (Baill.) Sim                                     | Malpighiales | Euphorbiaceae | <b>KM894261</b> | -               |
| <i>Macaranga monandra</i> Müll.Arg.                                        | Malpighiales | Euphorbiaceae | KC628123        | -               |
| <i>Mackaya bella</i> Harv.                                                 | Lamiales     | Acanthaceae   | JX572742        | JX518061        |
| <i>Maclura africana</i> (Bureau) Corner                                    | Rosales      | Moraceae      | JX572743        | JX518158        |
| <i>Macphersonia gracilis</i> var. <i>hildebrandtii</i> (O. Hoffm.) Capuron | Sapindales   | Sapindaceae   | -               | EU720697        |
| <i>Maerua andradae</i> Wild                                                | Brassicales  | Capparaceae   | KF147485        | KF147411        |
| <i>Maerua angolensis</i> DC.                                               | Brassicales  | Capparaceae   | JX572744        | JX518208        |
| <i>Maerua cafra</i> Pax                                                    | Brassicales  | Capparaceae   | JX572745        | JX517702        |
| <i>Maerua decumbens</i> (Brongn.) DeWolf                                   | Brassicales  | Capparaceae   | JX572746        | JX517701        |
| <i>Maerua juncea</i> subsp. <i>crustata</i> Wild                           | Brassicales  | Capparaceae   | JX572747        | JX517737        |

|                                                                   |              |                  |                 |                 |
|-------------------------------------------------------------------|--------------|------------------|-----------------|-----------------|
| <i>Maerua parvifolia</i> Pax                                      | Brassicales  | Capparaceae      | -               | JX518011        |
| <i>Maerua rosarinoides</i> Gilg & Ben.                            | Brassicales  | Capparaceae      | JX572748        | JX517903        |
| <i>Maesa lanceolata</i> Forssk.                                   | Ericales     | Primulaceae      | JF265513        | JF270859        |
| <i>Maesobotrya barteri</i> (Baill.) Hutch.                        | Malpighiales | Phyllanthaceae   | KC628061        | KC627489        |
| <i>Maesobotrya klaineana</i> (Pierre) J.Léonard                   | Malpighiales | Phyllanthaceae   | KC628244        | KC627623        |
| <i>Maesobotrya staudtii</i> (Pax) Hutch.                          | Malpighiales | Phyllanthaceae   | KC628083        | KC627507        |
| <i>Maesopsis eminii</i> Engl.                                     | Rosales      | Rhamnaceae       | KC628314        | KC627674        |
| <i>Magnistipula glaberrima</i> Engl.                              | Malpighiales | Chrysobalanaceae | KC628457        | KC627787        |
| <i>Mallotus oppositifolius</i> (Geiseler) Müll.Arg.               | Malpighiales | Euphorbiaceae    | -               | JX517554        |
| <i>Mammea africana</i> Sabine                                     | Malpighiales | Clusiaceae       | KC628358        | -               |
| <i>Manilkara concolor</i> (Harv.) Gerstner                        | Ericales     | Sapotaceae       | JX572750        | JX517949        |
| <i>Manilkara discolor</i> (Sond.) J.H.Hemsl.                      | Ericales     | Sapotaceae       | JX572752        | JX518015        |
| <i>Manilkara mochisia</i> (Baker) Dubard                          | Ericales     | Sapotaceae       | JF265514        | JF270860        |
| <i>Manilkara nicholsonii</i> A.E.van Wyk                          | Ericales     | Sapotaceae       | JX572753        | JX517570        |
| <i>Maprounea africana</i> Müll.Arg.                               | Malpighiales | Euphorbiaceae    | JX572754        | JX517335        |
| <i>Maprounea membranacea</i> Pax & K.Hoffm.                       | Malpighiales | Euphorbiaceae    | KC628676        | KC627941        |
| <i>Mareyopsis longifolia</i> (Pax) Pax & K.Hoffm.                 | Malpighiales | Euphorbiaceae    | KC628573        | KC627866        |
| <i>Margaritaria discoidea</i> (Baill.) G.L.Webster                | Malpighiales | Euphorbiaceae    | JX572755        | JX518168        |
| <i>Margaritaria discoidea</i> var. <i>nitida</i> (Pax) Radcl.-Sm. | Malpighiales | Euphorbiaceae    | JF265515        | JF270861        |
| <i>Markhamia obtusifolia</i> (Baker) Sprague                      | Lamiales     | Bignoniaceae     | JX572756        | JX517405        |
| <i>Markhamia zanzibarica</i> (Bojer ex DC.) K.Schum.              | Lamiales     | Bignoniaceae     | JX572757        | JX517896        |
| <i>Marquesia acuminata</i> (Gilg) R.E.Fr.                         | Malvales     | Dipterocarpaceae | <b>KU568000</b> | -               |
| <i>Mascarenhasia arborescens</i> A.DC.                            | Gentianales  | Apocynaceae      | JX572758        | JX517477        |
| <i>Massularia acuminata</i> (G.Don) Bullock ex Hoyle              | Gentianales  | Rubiaceae        | KC628272        | KC627643        |
| <i>Maurocenia frangula</i> Mill.                                  | Celastrales  | Celastraceae     | AM234957        | DQ217538        |
| <i>Maytenus abbottii</i> A.E.van Wyk                              | Celastrales  | Celastraceae     | JX572759        | JX517940        |
| <i>Maytenus acuminata</i> (L.f.) Loes.                            | Celastrales  | Celastraceae     | JX572760        | JX517555        |
| <i>Maytenus albata</i> (N.E.Br.) E.Schmidt bis & Jordaan          | Celastrales  | Celastraceae     | JX572761        | JX517851        |
| <i>Maytenus cordata</i> (E.Mey. ex Sond.) Loes.                   | Celastrales  | Celastraceae     | JX572762        | JX517915        |
| <i>Maytenus oleoides</i> (Lam.) Loes.                             | Celastrales  | Celastraceae     | JX572763        | JX517991        |
| <i>Maytenus peduncularis</i> Loes.                                | Celastrales  | Celastraceae     | JX572764        | JX517460        |
| <i>Maytenus procumbens</i> (L. f.) Loes.                          | Celastrales  | Celastraceae     | -               | JX970911        |
| <i>Maytenus</i> sp. nov. A                                        | Celastrales  | Celastraceae     | JX572765        | JX517794        |
| <i>Maytenus undata</i> (Thunb.) Blakelock                         | Celastrales  | Celastraceae     | JX572766        | JX517671        |
| <i>Meiostemon tetrandrus</i> (Exell) Exell & Stace                | Myrtales     | Combretaceae     | JX572767        | JX518048        |
| <i>Memecylon afzelii</i> G.Don                                    | Myrtales     | Melastomataceae  | KC628508        | KC627822        |
| <i>Memecylon englerianum</i> Cogn.                                | Myrtales     | Melastomataceae  | KC628015        | KC627460        |
| <i>Memecylon flavovirens</i> Baker                                | Myrtales     | Melastomataceae  | <b>KU568101</b> | <b>KX146321</b> |
| <i>Memecylon lateriflorum</i> (G.Don) Bremek.                     | Myrtales     | Melastomataceae  | KC628177        | KC627572        |
| <i>Memecylon laurentii</i> De Wild                                | Myrtales     | Melastomataceae  | KC628348        | KC627704        |
| <i>Memecylon natalense</i> Markg.                                 | Myrtales     | Melastomataceae  | -               | JX517426        |
| <i>Metalasia densa</i> (Lam.) P.O.Karis                           | Asterales    | Asteraceae       | JQ412390        | JQ412265        |

|                                                             |              |                  |                 |                 |
|-------------------------------------------------------------|--------------|------------------|-----------------|-----------------|
| <i>Metalsia muricata</i> (L.) D.Don                         | Asterales    | Asteraceae       | JX572769        | JX517917        |
| <i>Metarungia longistrobis</i> (C.B.Clarke) Baden           | Lamiales     | Acanthaceae      | JF265518        | JF270864        |
| <i>Metrosideros angustifolia</i> (L.) Sm.                   | Myrtales     | Myrtaceae        | JX572770        | JX517871        |
| <i>Micklethwaitia carvalhoi</i> (Harms) G.P.Lewis & Schrire | Fabales      | Fabaceae         | <b>KU568067</b> | <b>KX146290</b> |
| <i>Micrococca capensis</i> (Baill.) Prain                   | Malpighiales | Euphorbiaceae    | KF147486        | KF147412        |
| <i>Microcos coriacea</i> (Mast.) Burret                     | Malvales     | Malvaceae        | KC628199        | KC627591        |
| <i>Microdesmis afrodecandra</i> Floret Louis & Reitsma      | Malpighiales | Pandaceae        | KC627948        | KC627406        |
| <i>Microdesmis puberula</i> Hook.f. ex Planch.              | Malpighiales | Pandaceae        | KC628621        | KC627901        |
| <i>Milicia excelsa</i> (Welw.) C.C.Berg                     | Rosales      | Moraceae         | JX572771        | JX517997        |
| <i>Millettia grandis</i> (E.Mey.) Skeels                    | Fabales      | Fabaceae         | -               | JX517504        |
| <i>Millettia makondensis</i> Harms                          | Fabales      | Fabaceae         | KF147487        | KF147413        |
| <i>Millettia mossambicensis</i> J.B.Gillett                 | Fabales      | Fabaceae         | JX572772        | JX517618        |
| <i>Millettia stuhlmannii</i> Taub.                          | Fabales      | Fabaceae         | JX572773        | JX517411        |
| <i>Millettia usaramensis</i> Taub.                          | Fabales      | Fabaceae         | JX905971        | JX905956        |
| <i>Mimetes arboreus</i> Rourke                              | Proteales    | Proteaceae       | GQ248642        | GQ248156        |
| <i>Mimetes fimbriifolius</i> Salisb. ex Knight              | Proteales    | Proteaceae       | JX572774        | JX518183        |
| <i>Mimusops caffra</i> E.Mey. ex A.DC.                      | Ericales     | Sapotaceae       | JX572776        | JX517777        |
| <i>Mimusops obovata</i> Sond.                               | Ericales     | Sapotaceae       | JX572777        | JX517628        |
| <i>Mimusops obtusifolia</i> Lam.                            | Ericales     | Sapotaceae       | JX572778        | JX518165        |
| <i>Mimusops zeyheri</i> Sond.                               | Ericales     | Sapotaceae       | JX572779        | JX517445        |
| <i>Mitriostigma axillare</i> Hochst.                        | Gentianales  | Rubiaceae        | JX572780        | JX517739        |
| <i>Monanthataxis buchananii</i> (Engl.) Verdc.              | Magnoliales  | Annonaceae       | JX572781        | JX517585        |
| <i>Monanthataxis caffra</i> Verdc.                          | Magnoliales  | Annonaceae       | JF265520        | JF270866        |
| <i>Mondia Skeels</i>                                        | Gentianales  | Apocynaceae      | -               | AY899941        |
| <i>Monodora junodii</i> Engl. & Diels                       | Magnoliales  | Annonaceae       | JX572782        | JX518164        |
| <i>Monodora junodii</i> Engl. & Diels var. <i>macrantha</i> | Magnoliales  | Annonaceae       | JX572783        | JX517853        |
| <i>Monodora stenopetala</i> Oliv.                           | Magnoliales  | Annonaceae       | JX572784        | JX518064        |
| <i>Monotes engleri</i> Gilg                                 | Malvales     | Dipterocarpaceae | <b>KU568012</b> | -               |
| <i>Monotes glaber</i> Sprague                               | Malvales     | Dipterocarpaceae | JX572785        | JX517931        |
| <i>Monotes katangensis</i> (De Wild.) De Wild.              | Malvales     | Dipterocarpaceae | <b>KU568016</b> | -               |
| <i>Montinia caryophyllacea</i> Thunb.                       | Solanales    | Montiniaceae     | -               | AJ429359        |
| <i>Morella brevifolia</i> (E. Mey. ex C. DC.) Killick       | Fagales      | Myricaceae       | KF147488        | KF147414        |
| <i>Morella cordifolia</i> (L.) Killick                      | Fagales      | Myricaceae       | JX572786        | JX517650        |
| <i>Morella pilulifera</i> (Rendle) Killick                  | Fagales      | Myricaceae       | JF265521        | JF270867        |
| <i>Morella serrata</i> (Lam.) Killick                       | Fagales      | Myricaceae       | JX572787        | JX517577        |
| <i>Moringa oleifera</i> Lam.                                | Brassicales  | Moringaceae      | L11359.2        | AY483223        |
| <i>Moringa ovalifolia</i> Dinter & A.Berger                 | Brassicales  | Moringaceae      | -               | AY461577        |
| <i>Morus mesozygia</i> Stapf                                | Rosales      | Moraceae         | <b>KM894201</b> | <b>KM896880</b> |
| <i>Mostuea brunonis</i> Didr.                               | Gentianales  | Gelsemiaceae     | KC628012        | KC627457        |
| <i>Mucuna poggei</i> Taub.                                  | Fabales      | Fabaceae         | <b>KU568079</b> | -               |
| <i>Multidentia crassa</i> (Hiern) Bridson & Verdc.          | Gentianales  | Rubiaceae        | <b>KU568104</b> | <b>KX146323</b> |

|                                                                                        |              |                  |                 |                 |
|----------------------------------------------------------------------------------------|--------------|------------------|-----------------|-----------------|
| <i>Mundulea sericea</i> (Willd.) A.Chev.                                               | Fabales      | Fabaceae         | JX572788        | JX517667        |
| <i>Musanga cecropioides</i> R.Br.                                                      | Rosales      | Urticaceae       | KC628289        | KC627656        |
| <i>Mussaenda arcuata</i> Poir.                                                         | Gentianales  | Rubiaceae        | Y11854          | HM119551        |
| <i>Myrianthus holstii</i> Engl.                                                        | Rosales      | Urticaceae       | <b>KM894223</b> | <b>KM896899</b> |
| <i>Myrsine africana</i> L.                                                             | Ericales     | Primulaceae      | JX572789        | JX518081        |
| <i>Myroxylon aethiopicum</i> (Thunb.) Loes. subsp. <i>burkeanum</i> (Sond.) R.H.Archer | Celastrales  | Celastraceae     | KF147489        | -               |
| <i>Myroxylon aethiopicum</i> subsp. <i>schlechteri</i> (Loes.) R.H. Archer             | Celastrales  | Celastraceae     | JX572790        | JX517904        |
| <i>Napoleonaea talbotii</i> Baker f.                                                   | Ericales     | Lecythidaceae    | KC628506        | KC627820        |
| <i>Necepsia</i> Prain                                                                  | Malpighiales | Euphorbiaceae    | -               | AB233764        |
| <i>Nectaropetalum capense</i> Stapf & Boodle                                           | Malpighiales | Erythroxylaceae  | JX572791        | -               |
| <i>Nectaropetalum zuluense</i> (Schönland) Corbishley                                  | Malpighiales | Erythroxylaceae  | KF147490        | KF147416        |
| <i>Neoboutonia mannii</i> Benth. & Hook.f.                                             | Malpighiales | Euphorbiaceae    | AY794896        | AB233777        |
| <i>Newtonia buchananii</i> (Baker) G.C.C.Gilbert & Boutique                            | Fabales      | Fabaceae         | -               | AF521847        |
| <i>Newtonia duparquetiana</i> (Baill.) Keay                                            | Fabales      | Fabaceae         | KC628005        | KC627451        |
| <i>Newtonia hildebrandtii</i> (Vatke) Torre                                            | Fabales      | Fabaceae         | -               | AF521848        |
| <i>Newtonia leucocarpa</i> (Harms) G.C.C.Gilbert & Boutique                            | Fabales      | Fabaceae         | KC628584        | KC627875        |
| <i>Nicotiana africana</i> Merxm.                                                       | Solanales    | Solanaceae       | -               | AJ585881        |
| <i>Nuxia congesta</i> R.Br. ex Fresen.                                                 | Lamiales     | Scrophulariaceae | JF265525        | JF270871        |
| <i>Nuxia floribunda</i> Benth.                                                         | Lamiales     | Scrophulariaceae | JF265526        | JF270872        |
| <i>Nuxia oppositifolia</i> (Hochst.) Benth.                                            | Lamiales     | Scrophulariaceae | JX572793        | JX517443        |
| <i>Nylandtia Dumort.</i>                                                               | Fabales      | Polygalaceae     | GQ248650        | AM889730        |
| <i>Nymania capensis</i> Lindb.                                                         | Sapindales   | Meliaceae        | JX572794        | JX518038        |
| <i>Obetia tenax</i> Friis                                                              | Rosales      | Urticaceae       | JX572795        | JX518232        |
| <i>Ochna angustata</i> N.Robson                                                        | Malpighiales | Ochnaceae        | <b>KF147491</b> | <b>KF147417</b> |
| <i>Ochna arborea</i> Burch. ex DC.                                                     | Malpighiales | Ochnaceae        | KF147491        | KF147417        |
| <i>Ochna confusa</i> Burt Davy & Greenway                                              | Malpighiales | Ochnaceae        | KF147492        | KF147418        |
| <i>Ochna holstii</i> Engl.                                                             | Malpighiales | Ochnaceae        | KF147493        | -               |
| <i>Ochna inermis</i> (Forssk.) Schweinf. ex Penz.                                      | Malpighiales | Ochnaceae        | KF147494        | KF147419        |
| <i>Ochna natalitia</i> (Meisn.) Walp.                                                  | Malpighiales | Ochnaceae        | JF265529        | KF147420        |
| <i>Ochna pulchra</i> Hook.                                                             | Malpighiales | Ochnaceae        | KF147495        | KF147421        |
| <i>Ochna serrulata</i> Walp.                                                           | Malpighiales | Ochnaceae        | -               | HM850999        |
| <i>Ocotea bullata</i> (Burch.) E. Meyer in Drege                                       | Laurales     | Lauraceae        | JQ025066        | JQ024978        |
| <i>Octoknema affinis</i> Pierre                                                        | Santalales   | Olacaceae        | KC628082        | KC627506        |
| <i>Olax dissitiflora</i> Oliv.                                                         | Santalales   | Olacaceae        | JX572796        | JX517428        |
| <i>Olax latifolia</i> Engl.                                                            | Santalales   | Olacaceae        | KC628198        | KC627590        |
| <i>Olax pentandra</i> Sleumer                                                          | Santalales   | Olacaceae        | <b>KU568152</b> | <b>KX146367</b> |
| <i>Oldenburgia grandis</i> (Thunb.) Baill.                                             | Asterales    | Asteraceae       | -               | EU385379        |
| <i>Olea capensis</i> L.                                                                | Lamiales     | Oleaceae         | JX572797        | JX517691        |
| <i>Olea capensis</i> subsp. <i>hochstetteri</i> (Baker) Friis & P.S.Green              | Lamiales     | Oleaceae         | JX572798        | JX518236        |
| <i>Olea europaea</i> L.                                                                | Lamiales     | Oleaceae         | JX572799        | JX518175        |
| <i>Olea exasperata</i> Jacq.                                                           | Lamiales     | Oleaceae         | JX572800        | JX518125        |
| <i>Olea woodiana</i> Knobl.                                                            | Lamiales     | Oleaceae         | JX572801        | JX517442        |

|                                                                         |              |               |                 |                 |
|-------------------------------------------------------------------------|--------------|---------------|-----------------|-----------------|
| <i>Olinia capensis</i> Klotzsch                                         | Myrtales     | Penaeaceae    | AM235624        | AY151569        |
| <i>Olinia emarginata</i> Burttt Davy                                    | Myrtales     | Penaeaceae    | JX572802        | JX970901        |
| <i>Olinia radiata</i> Hofmeyr & E.Phillips                              | Myrtales     | Penaeaceae    | JX572803        | JX517492        |
| <i>Olinia vangueriooides</i> Baker f.                                   | Myrtales     | Penaeaceae    | AM235626        | AY151572        |
| <i>Olinia ventosa</i> (L.) Cufod.                                       | Myrtales     | Penaeaceae    | JX572804        | JX517344        |
| <i>Oncinotis tenuiloba</i> Stapf                                        | Gentianales  | Apocynaceae   | JX572805        | JX517556        |
| <i>Oncoba glauca</i> (P.Beauv.) Planch.                                 | Malpighiales | Salicaceae    | KC627964        | KC627419        |
| <i>Oncoba mannii</i> Oliv.                                              | Malpighiales | Salicaceae    | KC628229        | KC627612        |
| <i>Oncoba spinosa</i> Forssk.                                           | Malpighiales | Salicaceae    | JX572806        | JX517821        |
| <i>Opilia amentacea</i> Roxb.                                           | Santalales   | Opiliaceae    | <b>KU568164</b> | <b>KX146379</b> |
| <i>Opilia</i> Roxb.                                                     | Santalales   | Opiliaceae    | -               | AY042621        |
| <i>Oreobambos buchwaldii</i> K.Schum.                                   | Poales       | Poaceae       | -               | EU434272        |
| <i>Oricia lecomteana</i> Pierre                                         | Sapindales   | Rutaceae      | KC628151        | -               |
| <i>Ormocarpum kirkii</i> S.Moore                                        | Fabales      | Fabaceae      | JX572809        | JX517953        |
| <i>Ormocarpum trichocarpum</i> (Taub.) Engl.                            | Fabales      | Fabaceae      | JX572810        | JX517885        |
| <i>Osyris compressa</i> A.DC.                                           | Santalales   | Santalaceae   | JX572811        | JX517721        |
| <i>Osyris lanceolata</i> Hochst. & Steud.                               | Santalales   | Santalaceae   | JX572812        | JX517317        |
| <i>Otholobium caffrum</i> (Eckl. & Zeyh.) C.H.Stirt.                    | Fabales      | Fabaceae      | JX572813        | JX970905        |
| <i>Otholobium polystictum</i> (Harv.) C.H.Stirt.                        | Fabales      | Fabaceae      | <b>KM894204</b> | <b>KM896882</b> |
| <i>Otholobium spicatum</i> (L.) C.H.Stirt.                              | Fabales      | Fabaceae      | JX572814        | JX517502        |
| <i>Otholobium stachyerum</i> (Eckl. & Zeyh.) C.H.Stirt.                 | Fabales      | Fabaceae      | <b>KM894208</b> | <b>KM896885</b> |
| <i>Otholobium wilmsii</i> (Harms) C.H.Stirt.                            | Fabales      | Fabaceae      | JX572815        | JX517354        |
| <i>Oubanguia alata</i> Baker f.                                         | Ericales     | Lecythidaceae | KC628456        | KC627786        |
| <i>Oubanguia laurifolia</i> (Pierre ex De Wild.) Tiegh.                 | Ericales     | Lecythidaceae | KC627946        | KC627404        |
| <i>Oxyanthus goetzei</i> K.Schum.                                       | Gentianales  | Rubiaceae     | <b>KU568096</b> | <b>KX146317</b> |
| <i>Oxyanthus latifolius</i> Sond.                                       | Gentianales  | Rubiaceae     | JX572816        | JX517392        |
| <i>Oxyanthus laxiflorus</i> K.Schum. ex Hutch. & Dalziel                | Gentianales  | Rubiaceae     | KC628264        | KC627636        |
| <i>Oxyanthus pyriformis</i> (Hochst.) Skeels                            | Gentianales  | Rubiaceae     | JX572817        | JX517942        |
| <i>Oxyanthus speciosus</i> subsp. <i>gerrardii</i> (Sond.) Bridson      | Gentianales  | Rubiaceae     | JX572818        | JX517484        |
| <i>Oxyanthus speciosus</i> subsp. <i>stenocarpus</i> (K.Schum.) Bridson | Gentianales  | Rubiaceae     | <b>KU568150</b> | <b>KX146365</b> |
| <i>Oxytenanthera abyssinica</i> (A.Rich.) Munro                         | Poales       | Poaceae       | JX572819        | JX905952        |
| <i>Ozorea laetans</i> Retief                                            | Sapindales   | Anacardiaceae | KF147499        | <b>KX146255</b> |
| <i>Ozorea albicans</i> R.Fern. & A.Fern.                                | Sapindales   | Anacardiaceae | KF147498        | -               |
| <i>Ozorea barbertonensis</i> Retief                                     | Sapindales   | Anacardiaceae | <b>KU568020</b> | KF147424        |
| <i>Ozorea Delile</i> sp. nov                                            | Sapindales   | Anacardiaceae | KF147497        | KF147423        |
| <i>Ozorea engleri</i> R.Fern. & A.Fern.                                 | Sapindales   | Anacardiaceae | JX572820        | JX518126        |
| <i>Ozorea homblei</i> (De Wild.) R.Fern. & A.Fern.                      | Sapindales   | Anacardiaceae | <b>KU568118</b> | <b>KX146336</b> |
| <i>Ozorea insignis</i> subsp. <i>reticulata</i> (Baker f.) J.B.Gillett  | Sapindales   | Anacardiaceae | <b>KU568163</b> | <b>KX146378</b> |
| <i>Ozorea longipes</i> (Engl. & Gilg) R.Fern. & A.Fern.                 | Sapindales   | Anacardiaceae | <b>KU568058</b> | <b>KX146281</b> |
| <i>Ozorea nitida</i> (Engl. & Brehmer) R. Fern. & A. Fern.              | Sapindales   | Anacardiaceae | <b>KU567995</b> | <b>KX146226</b> |
| <i>Ozorea obovata</i> (Oliv.) R. Fern. & A. Fern.                       | Sapindales   | Anacardiaceae | JX572821        | JX517800        |
| <i>Ozorea paniculosa</i> var. <i>paniculosa</i> R.Fern. & A.Fern.       | Sapindales   | Anacardiaceae | JX572822        | JX517435        |

|                                                               |              |                  |                 |                 |
|---------------------------------------------------------------|--------------|------------------|-----------------|-----------------|
| <i>Ozoroa sphaerocarpa</i> R.Fern. & A.Fern.                  | Sapindales   | Anacardiaceae    | JX572823        | JX517468        |
| <i>Pachypodanthium</i> sp.                                    | Magnoliales  | Annonaceae       | KC628566        | KC627861        |
| <i>Pachypodium namaquanum</i> (Wyley ex Harv.) Welw.          | Gentianales  | Apocynaceae      | JX572824        | JX517791        |
| <i>Pachypodium saundersii</i> N.E.Br.                         | Gentianales  | Apocynaceae      | JX572825        | JX517532        |
| <i>Pancovia golungensis</i> (Hiern) Exell & Mendonça          | Sapindales   | Sapindaceae      | JX572826        | JX517712        |
| <i>Pandanus livingstonianus</i> Rendle                        | Pandanales   | Pandanaceae      | <b>KU567986</b> | <b>KX146305</b> |
| <i>Pappea capensis</i> Eckl. & Zeyh.                          | Sapindales   | Sapindaceae      | JX572827        | JX517327        |
| <i>Paranomus bracteolaris</i> Salisb. ex Knight               | Proteales    | Proteaceae       | JX572828        | JX517606        |
| <i>Paranomus tomentosus</i> N.E. Br.                          | Proteales    | Proteaceae       | JX572829        | JX517966        |
| <i>Parinari capensis</i> Harv. subsp. <i>incohata</i> F.White | Malpighiales | Chrysobalanaceae | -               | JX905947        |
| <i>Parinari curatellifolia</i> Planch. ex Benth.              | Malpighiales | Chrysobalanaceae | JX572830        | JX517369        |
| <i>Parinari excelsa</i> Sabine                                | Malpighiales | Chrysobalanaceae | KF147501        | -               |
| <i>Paropsia braunii</i> Gilg                                  | Malpighiales | Passifloraceae   | <b>KU568128</b> | -               |
| <i>Paropsia brazzaeana</i> Baill.                             | Malpighiales | Passifloraceae   | KF147502        | KF147429        |
| <i>Passerina corymbosa</i> Eckl. ex C.H. Wright               | Malvales     | Thymelaeaceae    | JX572831        | JX517973        |
| <i>Passerina drakensbergensis</i> Hilliard & B.L. Burt        | Malvales     | Thymelaeaceae    | AM162528        | -               |
| <i>Passerina falcifolia</i> (Meisn.) C.H. Wright              | Malvales     | Thymelaeaceae    | AJ297224        | -               |
| <i>Passerina filiformis</i> L.                                | Malvales     | Thymelaeaceae    | JX572832        | JX518022        |
| <i>Passerina montana</i> Thoday                               | Malvales     | Thymelaeaceae    | JX572833        | JX517533        |
| <i>Passerina montivaga</i> Bredenkamp & A.E. van Wyk          | Malvales     | Thymelaeaceae    | AM162531        | -               |
| <i>Passerina rigida</i> Wikstr.                               | Malvales     | Thymelaeaceae    | JX572834        | JX518094        |
| <i>Pauridiantha floribunda</i> (K.Schum. & K.Krause) Bremek.  | Gentianales  | Rubiaceae        | KC628127        | KC627534        |
| <i>Pauridiantha symplocoides</i> (S.Moore) Bremek.            | Gentianales  | Rubiaceae        | -               | AY538410        |
| <i>Pauridiantha talbotii</i> (Wernham) Ntore & Dessein        | Gentianales  | Rubiaceae        | KC628609        | KC627894        |
| <i>Pausinystalia johimbe</i> (K.Schum.) Pierre ex Beille      | Gentianales  | Rubiaceae        | KC627988        | KC627438        |
| <i>Pausinystalia macroceras</i> (K.Schum.) Pierre ex Beille   | Gentianales  | Rubiaceae        | KC628071        | KC627497        |
| <i>Pavetta bowkeri</i> Harv.                                  | Gentianales  | Rubiaceae        | JX572836        | JX518106        |
| <i>Pavetta cataractarum</i> S.Moore                           | Gentianales  | Rubiaceae        | <b>KU568075</b> | <b>KX146297</b> |
| <i>Pavetta catophylla</i> K.Schum.                            | Gentianales  | Rubiaceae        | JX572837        | JX517846        |
| <i>Pavetta edentula</i> Sond.                                 | Gentianales  | Rubiaceae        | JX572838        | JX517382        |
| <i>Pavetta eylesii</i> S.Moore                                | Gentianales  | Rubiaceae        | <b>KU567983</b> | <b>KX146217</b> |
| <i>Pavetta galpinii</i> Bremek.                               | Gentianales  | Rubiaceae        | JX572839        | JX518147        |
| <i>Pavetta gerstneri</i> Bremek.                              | Gentianales  | Rubiaceae        | <b>KM894234</b> | -               |
| <i>Pavetta harborii</i> S.Moore                               | Gentianales  | Rubiaceae        | <b>KU568093</b> | -               |
| <i>Pavetta inandensis</i> Bremek.                             | Gentianales  | Rubiaceae        | JX572840        | JX517852        |
| <i>Pavetta lanceolata</i> Eckl.                               | Gentianales  | Rubiaceae        | JX572841        | JX518143        |
| <i>Pavetta radicans</i> Hiern                                 | Gentianales  | Rubiaceae        | <b>KU568003</b> | <b>KX146232</b> |
| <i>Pavetta refractifolia</i> K.Schum.                         | Gentianales  | Rubiaceae        | <b>KU568074</b> | <b>KX146296</b> |
| <i>Pavetta revoluta</i> Hochst.                               | Gentianales  | Rubiaceae        | JX572842        | JX517474        |
| <i>Pavetta schumanniana</i> F.Hoffm. ex K.Schum.              | Gentianales  | Rubiaceae        | JX572843        | JX518179        |
| <i>Pavetta staudtii</i> Hutch. & Dalziel                      | Gentianales  | Rubiaceae        | KC628412        | KC627753        |
| <i>Pavetta zeyheri</i> Sond.                                  | Gentianales  | Rubiaceae        | JX572844        | JX518055        |

|                                                          |                |                |                 |                 |
|----------------------------------------------------------|----------------|----------------|-----------------|-----------------|
| <i>Peddiea africana</i> Harv.                            | Malvales       | Thymelaeaceae  | JX572845        | JX518167        |
| <i>Peddiea fischeri</i> Engl.                            | Malvales       | Thymelaeaceae  | <b>KU568092</b> | -               |
| <i>Peltophorum africanum</i> Sond.                       | Fabales        | Fabaceae       | JX572846        | JX517837        |
| <i>Pentadesma butyracea</i> Sabine                       | Malpighiales   | Clusiaceae     | KC628591        | -               |
| <i>Pericopsis angolensis</i> (Baker) Meeuwen             | Fabales        | Fabaceae       | <b>KU568030</b> | <b>KX146254</b> |
| <i>Petitiocodon parviflorum</i> (Keay) Robbr.            | Gentianales    | Rubiaceae      | KC628073        | KC627499        |
| <i>Phaeoptilum spinosum</i> Radlk.                       | Caryophyllales | Nyctaginaceae  | JX572847        | JX518227        |
| <i>Philenoptera bussei</i> (Harms) Schrire               | Fabales        | Fabaceae       | JX572848        | JX518116        |
| <i>Philenoptera violacea</i> (Klotzsch) Schrire          | Fabales        | Fabaceae       | JF265547        | JF270890        |
| <i>Phoenix reclinata</i> Jacq.                           | Arecales       | Arecaceae      | JX572849        | JX518180        |
| <i>Phyllica buxifolia</i> L.                             | Rosales        | Rhamnaceae     | JX572850        | JX488292        |
| <i>Phyllica oleaeifolia</i> Vent.                        | Rosales        | Rhamnaceae     | JX572851        | JX517337        |
| <i>Phyllica paniculata</i> Willd.                        | Rosales        | Rhamnaceae     | JX572852        | JX517422        |
| <i>Phyllanthus engleri</i> Pax                           | Malpighiales   | Phyllanthaceae | <b>KU568064</b> | <b>KX146219</b> |
| <i>Phyllanthus hutchinsonianus</i> S.Moore               | Malpighiales   | Euphorbiaceae  | -               | AY936601        |
| <i>Phyllanthus inflatus</i> Hutch.                       | Malpighiales   | Euphorbiaceae  | JX572853        | JX518030        |
| <i>Phyllanthus ovalifolius</i> Forssk.                   | Malpighiales   | Euphorbiaceae  | JX572854        | JX518152        |
| <i>Phyllanthus pinnatus</i> (Wight) G.L.Webster          | Malpighiales   | Euphorbiaceae  | JF265549        | JF270892        |
| <i>Phyllanthus reticulatus</i> Poir.                     | Malpighiales   | Euphorbiaceae  | JF265550        | JF270893        |
| <i>Phyllobotryon spathulatum</i> Müll.Arg.               | Malpighiales   | Salicaceae     | KC628607        | KC627892        |
| <i>Phymaspermum acerosum</i> (DC.) Källersjö             | Asterales      | Asteraceae     | JX572855        | JX517882        |
| <i>Piper capense</i> L.f.                                | Piperales      | Piperaceae     | <b>KU568022</b> | <b>KX146263</b> |
| <i>Piptostigma oyemense</i> Pellegr.                     | Magnoliales    | Annonaceae     | KC627994        | KC627444        |
| <i>Pisonia aculeata</i> L.                               | Caryophyllales | Nyctaginaceae  | <b>KU568040</b> | <b>KX146265</b> |
| <i>Pittosporum viridiflorum</i> Sims                     | Apiales        | Pittosporaceae | JX572857        | JX517842        |
| <i>Placodiscus</i> sp.                                   | Sapindales     | Sapindaceae    | KC628097        | KC627514        |
| <i>Platylophus trifoliatus</i> D. Don                    | Oxalidales     | Cunoniaceae    | JX572858        | JX517817        |
| <i>Plectranthus fruticosus</i> L'Hér.                    | Lamiales       | Lamiaceae      | <b>KM894200</b> | -               |
| <i>Pleiocarpa pycnantha</i> (K.Schum.) Stapf             | Gentianales    | Apocynaceae    | JX572860        | JX517964        |
| <i>Pleiocarpa rostrata</i> Benth.                        | Gentianales    | Apocynaceae    | KC628006        | KC627452        |
| <i>Pleioceras orientale</i> Vollesen                     | Gentianales    | Apocynaceae    | -               | EF456364        |
| <i>Pleurostylia capensis</i> Oliv.                       | Celastrales    | Celastraceae   | JX572861        | JX517549        |
| <i>Pluchea dioscoridis</i> (L.) DC.                      | Asterales      | Asteraceae     | JX572909        | JX517666        |
| <i>Plumbago auriculata</i> Lam.                          | Caryophyllales | Plumbaginaceae | EU002283        | JF270896        |
| <i>Podalyria calyptata</i> (Retz.) Willd.                | Fabales        | Fabaceae       | JX572864        | JX518039        |
| <i>Podalyria myrtillifolia</i> Willd.                    | Fabales        | Fabaceae       | JX572865        | JX517747        |
| <i>Podalyria velutina</i> Benth.                         | Fabales        | Fabaceae       | <b>KM894209</b> | <b>KM896886</b> |
| <i>Podocarpus elongatus</i> (Aiton) L'Hér. ex Pers.      | Pinales        | Podocarpaceae  | HM593643        | HM593746        |
| <i>Podocarpus henkelii</i> Stapf ex Dallim. & B.D.Jacks. | Pinales        | Podocarpaceae  | AF249610        | HM593751        |
| <i>Podocarpus latifolius</i> (Thunb.) R.Br. ex Mirb.     | Pinales        | Podocarpaceae  | AF249612        | HM593754        |
| <i>Polyceratocarpus parviflorus</i> (Baker f.) Ghesq.    | Magnoliales    | Annonaceae     | KC628534        | KC627837        |
| <i>Polygala myrtifolia</i> L.                            | Fabales        | Polygalaceae   | JX572866        | JX517548        |

|                                                                                 |                |               |                 |                 |
|---------------------------------------------------------------------------------|----------------|---------------|-----------------|-----------------|
| <i>Polygala virgata</i> var. <i>decora</i> (Sond.) Harv.                        | Fabales        | Polygalaceae  | JX572868        | JX517329        |
| <i>Polyscias fulva</i> (Hiern) Harms                                            | Apiales        | Araliaceae    | JX572870        | JX517735        |
| <i>Polysphaeria lanceolata</i> Hiern                                            | Gentianales    | Rubiaceae     | JX572871        | JX518079        |
| <i>Polysphaeria macrophylla</i> K.Schum.                                        | Gentianales    | Rubiaceae     | KC628319        | KC627679        |
| <i>Portulacaria afra</i> Jacq.                                                  | Caryophyllales | Portulacaceae | JX572874        | JX517924        |
| <i>Pouteria adolfi-friedericii</i> subsp. <i>australis</i> (J.H.Hemsl.) L.Gaut. | Ericales       | Sapotaceae    | -               | FJ037946        |
| <i>Pouzolzia mixta</i> Solms                                                    | Rosales        | Urticaceae    | JQ025073        | JQ024983        |
| <i>Premna maoiensis</i> (H.Pearson) W.Piep.                                     | Lamiales       | Lamiaceae     | JX572875        | JX517986        |
| <i>Prionostemma delagoensis</i> (Loes.) N.Hallé                                 | Celastrales    | Celastraceae  | -               | JX517579        |
| <i>Pristimera longipetiolata</i> (Oliv.) N. Hallé                               | Celastrales    | Celastraceae  | JX572876        | JX517581        |
| <i>Protea acaulos</i> Reich.                                                    | Proteales      | Proteaceae    | <b>KM894219</b> | <b>KM896896</b> |
| <i>Protea acuminata</i> Sims                                                    | Proteales      | Proteaceae    | <b>KM894251</b> | <b>KM896921</b> |
| <i>Protea angustata</i> R. Br.                                                  | Proteales      | Proteaceae    | <b>KM894245</b> | <b>KM896916</b> |
| <i>Protea aurea</i> subsp. <i>aurea</i> Rourke                                  | Proteales      | Proteaceae    | JX572877        | JX517773        |
| <i>Protea caffra</i> Meisn.                                                     | Proteales      | Proteaceae    | JX572878        | JX517909        |
| <i>Protea canaliculata</i> Andrews                                              | Proteales      | Proteaceae    | -               | <b>KM896890</b> |
| <i>Protea cordata</i> Thunb.                                                    | Proteales      | Proteaceae    | <b>KM894260</b> | <b>KM896931</b> |
| <i>Protea coronata</i> Lam.                                                     | Proteales      | Proteaceae    | JX572879        | JX517822        |
| <i>Protea decurrens</i> Phillips                                                | Proteales      | Proteaceae    | <b>KM894235</b> | <b>KM896909</b> |
| <i>Protea eximia</i> (Knight) Fourc.                                            | Proteales      | Proteaceae    | <b>KP110418</b> | <b>KP110126</b> |
| <i>Protea gagedi</i> J.F.Gmel.                                                  | Proteales      | Proteaceae    | KF147503        | KF147430        |
| <i>Protea glabra</i> Thunb.                                                     | Proteales      | Proteaceae    | JX572880        | JX517612        |
| <i>Protea humiflora</i> Andrews                                                 | Proteales      | Proteaceae    | <b>KM894222</b> | <b>KM896898</b> |
| <i>Protea laevis</i> R. Br.                                                     | Proteales      | Proteaceae    | <b>KM894213</b> | <b>KM896891</b> |
| <i>Protea laurifolia</i> Thunb.                                                 | Proteales      | Proteaceae    | JX572881        | JX517919        |
| <i>Protea lorifolia</i> Fourc.                                                  | Proteales      | Proteaceae    | <b>KP110419</b> | -               |
| <i>Protea mundii</i> Klotzsch                                                   | Proteales      | Proteaceae    | JX572882        | JX517639        |
| <i>Protea nerifolia</i> R.Br.                                                   | Proteales      | Proteaceae    | -               | EU169659        |
| <i>Protea nitida</i> Mill.                                                      | Proteales      | Proteaceae    | JX572883        | JX517372        |
| <i>Protea parvula</i> Beard                                                     | Proteales      | Proteaceae    | KF147504        | KF147431        |
| <i>Protea petiolaris</i> (Hiern) Baker & C.H.Wright                             | Proteales      | Proteaceae    | <b>KU568069</b> | <b>KX146287</b> |
| <i>Protea piscina</i> Rourke                                                    | Proteales      | Proteaceae    | <b>KP110420</b> | -               |
| <i>Protea pityphylla</i> Phillips                                               | Proteales      | Proteaceae    | <b>KM894240</b> | <b>KM896912</b> |
| <i>Protea pudens</i> Rourke                                                     | Proteales      | Proteaceae    | <b>KM894257</b> | <b>KM896928</b> |
| <i>Protea punctata</i> Meisn.                                                   | Proteales      | Proteaceae    | JX572884        | JX517553        |
| <i>Protea repens</i> L.                                                         | Proteales      | Proteaceae    | JQ025075        | JX905940        |
| <i>Protea revoluta</i> R. Br.                                                   | Proteales      | Proteaceae    | <b>KM894253</b> | <b>KM896923</b> |
| <i>Protea roupelliae</i> subsp. <i>roupelliae</i> Meisn.                        | Proteales      | Proteaceae    | JX572885        | JX517802        |
| <i>Protea scabra</i> R. Br.                                                     | Proteales      | Proteaceae    | <b>KM894207</b> | <b>KM896884</b> |
| <i>Protea scabriuscula</i> Phillips                                             | Proteales      | Proteaceae    | <b>KM894202</b> | <b>KM896881</b> |
| <i>Protea scolymocephala</i> Reich.                                             | Proteales      | Proteaceae    | <b>KM894263</b> | <b>KM896933</b> |

|                                                                           |              |                |                 |                 |
|---------------------------------------------------------------------------|--------------|----------------|-----------------|-----------------|
| <i>Protea subulifolia</i> Rourke                                          | Proteales    | Proteaceae     | <b>KM894217</b> | <b>KM896894</b> |
| <i>Protea welwitschii</i> Engl.                                           | Proteales    | Proteaceae     | JX905962        | JX970896        |
| <i>Protomegalaria stapfiana</i> (Beille) Hutch.                           | Malpighiales | Phyllanthaceae | KC628007        | KC627453        |
| <i>Protorhus longifolia</i> (Bernh.) Engl.                                | Sapindales   | Anacardiaceae  | JX572886        | JX517542        |
| <i>Prunus africana</i> (Hook. f.) Kalkman                                 | Rosales      | Rosaceae       | JQ025076        | JQ024985        |
| <i>Pseudarthria hookeri</i> Wight & Arn.                                  | Fabales      | Fabaceae       | JF265559        | JF270902        |
| <i>Pseudobersama mossambicensis</i> (Sim) Verdc.                          | Sapindales   | Meliaceae      | JX572888        | JX517407        |
| <i>Pseudolachnostylis maprouneifolia</i> Pax                              | Malpighiales | Euphorbiaceae  | KF147505        | KF147432        |
| <i>Pseudophyllanthus ovalis</i> (E.Mey. ex Sond.) Voronts. & Petra Hoffm. | Malpighiales | Euphorbiaceae  | -               | AY830260        |
| <i>Pseudosalacia streyi</i> Codd                                          | Celastrales  | Celastraceae   | JX572889        | JX517644        |
| <i>Pseudoscolopia polyantha</i> Gilg                                      | Malpighiales | Salicaceae     | <b>KM894232</b> | -               |
| <i>Pseudospondias microcarpa</i> (A.Rich.) Engl.                          | Sapindales   | Anacardiaceae  | KC628472        | -               |
| <i>Psilanthus mannii</i> Hook.f.                                          | Gentianales  | Rubiaceae      | KC628039        | KC627472        |
| <i>Psoralea affinis</i> Eckl. & Zeyh.                                     | Fabales      | Fabaceae       | <b>KM894258</b> | <b>KM896929</b> |
| <i>Psoralea aphylla</i> L.                                                | Fabales      | Fabaceae       | JX572890        | JX517348        |
| <i>Psoralea arborea</i> Sims                                              | Fabales      | Fabaceae       | JX572895        | JX517541        |
| <i>Psoralea axillaris</i> L.f.                                            | Fabales      | Fabaceae       | JX572891        | JX518186        |
| <i>Psoralea filifolia</i> Eckl. & Zeyh.                                   | Fabales      | Fabaceae       | JX572892        | JX517464        |
| <i>Psoralea glabra</i> E.Mey.                                             | Fabales      | Fabaceae       | JX572893        | JX517873        |
| <i>Psoralea onobrychis</i> Nutt.                                          | Fabales      | Fabaceae       | <b>KU568055</b> | <b>KX146278</b> |
| <i>Psoralea pinnata</i> L.                                                | Fabales      | Fabaceae       | JX572894        | JX517859        |
| <i>Psoralea rhizotoma</i>                                                 | Fabales      | Fabaceae       | <b>KU568010</b> | <b>KX146239</b> |
| <i>Psychotria bimbiensis</i> Bridson & Cheek                              | Gentianales  | Rubiaceae      | KC628377        | KC627725        |
| <i>Psychotria butayei</i> De Wild.                                        | Gentianales  | Rubiaceae      | <b>KU568162</b> | <b>KX146377</b> |
| <i>Psychotria capensis</i> (Eckl.) Vatke                                  | Gentianales  | Rubiaceae      | JX572896        | JX517469        |
| <i>Psychotria dorotheae</i> Wernham                                       | Gentianales  | Rubiaceae      | KC628155        | -               |
| <i>Psychotria gabonica</i> Hiern                                          | Gentianales  | Rubiaceae      | KC628387        | KC627735        |
| <i>Psychotria kirkii</i> Hiern                                            | Gentianales  | Rubiaceae      | JX572835        | JX518135        |
| <i>Psychotria peduncularis</i> (Salisb.) Steyerl.                         | Gentianales  | Rubiaceae      | KF147506        | KF147433        |
| <i>Psychotria pumila</i> Hiern                                            | Gentianales  | Rubiaceae      | KF147507        | KF147434        |
| <i>Psychotria spithamea</i> S.Moore                                       | Gentianales  | Rubiaceae      | <b>KU568117</b> | <b>KX146335</b> |
| <i>Psychotria zombamontana</i> (Kuntze) E.M.A.Petit                       | Gentianales  | Rubiaceae      | <b>KM894233</b> | <b>KM896908</b> |
| <i>Psyrax locuples</i> (K.Schum.) Bridson                                 | Gentianales  | Rubiaceae      | JX572897        | JX518031        |
| <i>Psyrax micans</i> (Bullock) Bridson                                    | Gentianales  | Rubiaceae      | JX572898        | JX517914        |
| <i>Psyrax obovata</i> (Klotzsch ex Eckl. & Zeyh.) Bridson                 | Gentianales  | Rubiaceae      | JX572899        | JX970909        |
| <i>Ptaeroxylon obliquum</i> (Thunb.) Radlk.                               | Sapindales   | Rutaceae       | JQ025079        | JQ024988        |
| <i>Pteleopsis anisoptera</i> (Welw. ex M.A.Lawson) Engl. & Diels          | Myrtales     | Combretaceae   | JX572900        | JX517605        |
| <i>Pteleopsis myrtifolia</i> (M.A.Lawson) Engl. & Diels                   | Myrtales     | Combretaceae   | JX572901        | JX517526        |
| <i>Pterocarpus angolensis</i> DC.                                         | Fabales      | Fabaceae       | JX572902        | JX517843        |
| <i>Pterocarpus brenanii</i> Barbosa & Torre                               | Fabales      | Fabaceae       | JX572903        | JX517771        |
| <i>Pterocarpus lucens</i> subsp. <i>antunesii</i> (Taub.) Rojo            | Fabales      | Fabaceae       | <b>KU568062</b> | -               |
| <i>Pterocarpus rotundifolius</i> (Sond.) Druce                            | Fabales      | Fabaceae       | JX572904        | JX517562        |

|                                                                                    |              |                |                 |                 |
|------------------------------------------------------------------------------------|--------------|----------------|-----------------|-----------------|
| <i>Pterocarpus rotundifolius</i> subsp. <i>polyanthus</i> (Harms) Mendonca & Sousa | Fabales      | Fabaceae       | JX572905        | JX518110        |
| <i>Pterocelastrus echinatus</i> N.E.Br.                                            | Celastrales  | Celastraceae   | JX572906        | JX517334        |
| <i>Pterocelastrus rostratus</i> Walp.                                              | Celastrales  | Celastraceae   | JX572907        | JX517539        |
| <i>Pterocelastrus tricuspidatus</i> Walp.                                          | Celastrales  | Celastraceae   | JX572908        | JX517816        |
| <i>Pterolobium stellatum</i> (Forssk.) Brenan                                      | Fabales      | Fabaceae       | -               | JF270908        |
| <i>Ptychopetalum petiolatum</i> Oliv.                                              | Santalales   | Olacaceae      | KC628062        | KC627490        |
| <i>Putterlickia pyracantha</i> (L.) Endl.                                          | Asterales    | Celastraceae   | JX572910        | JX517305        |
| <i>Putterlickia retrospinosa</i> A.E.van Wyk & Mostert                             | Celastrales  | Celastraceae   | JX572911        | JX518119        |
| <i>Putterlickia saxatilis</i> (Burch.) Jordaan                                     | Celastrales  | Celastraceae   | <b>KU568146</b> | <b>KX146361</b> |
| <i>Putterlickia verrucosa</i> (E. Mey. ex Sond.) Szyszyl.                          | Celastrales  | Celastraceae   | JF265566        | JF270909        |
| <i>Pycnocomia littoralis</i> Pax                                                   | Malpighiales | Euphorbiaceae  | <b>KU568047</b> | <b>KX146270</b> |
| <i>Pycnocomia macrophylla</i> Benth.                                               | Malpighiales | Euphorbiaceae  | KC628665        | KC627933        |
| <i>Pycnostachys urticifolia</i> Hook.f.                                            | Celastrales  | Lamiaceae      | JF265567        | JF270910        |
| <i>Pygmaeothamnus chamaedendrum</i> (Kuntze) Robyns                                | Lamiales     | Rubiaceae      | KF147508        | KF147435        |
| <i>Pygmaeothamnus zeyheri</i> var. <i>rogersii</i> Robyns                          | Gentianales  | Rubiaceae      | <b>KU568081</b> | <b>KX146303</b> |
| <i>Pyrostria bibracteata</i> (Baker) Cavaco                                        | Gentianales  | Rubiaceae      | JX572914        | JX517448        |
| <i>Pyrostria hystrix</i> (Bremek.) Bridson                                         | Gentianales  | Rubiaceae      | JX572915        | JX517362        |
| <i>Quassia undulata</i> (Guill. & Perr.) D.Dietr.                                  | Sapindales   | Simaroubaceae  | <b>KU568111</b> | <b>KX146330</b> |
| <i>Rapanea melanophloeos</i> (L.) Mez                                              | Ericales     | Primulaceae    | JQ025081        | JQ024989        |
| <i>Raphia australis</i> Oberm. & Strey                                             | Arecales     | Arecaceae      | JX572917        | JX517810        |
| <i>Raphia farinifera</i> (Gaertn.) Hyl.                                            | Arecales     | Arecaceae      | <b>JX572918</b> | <b>JX517656</b> |
| <i>Raspalia trigyna</i> Dummer                                                     | Bruniales    | Bruniaceae     | -               | AY490925        |
| <i>Rauvolfia caffra</i> Sond.                                                      | Gentianales  | Apocynaceae    | JQ025082        | JQ024990        |
| <i>Rauvolfia mannii</i> Stapf                                                      | Gentianales  | Apocynaceae    | KC628072        | KC627498        |
| <i>Rauvolfia mombasiana</i> Stapf                                                  | Gentianales  | Apocynaceae    | <b>KU568014</b> | <b>KX146242</b> |
| <i>Rauvolfia vomitoria</i> Afzel.                                                  | Gentianales  | Apocynaceae    | KC628273        | KC627644        |
| <i>Rawsonia lucida</i> Harv. & Sond.                                               | Malpighiales | Salicaceae     | JX572920        | JX517624        |
| <i>Rhamnus prinoides</i> L'Hér.                                                    | Rosales      | Rhamnaceae     | JX572922        | JX518229        |
| <i>Rhaptopetalum</i> sp. nov. nov.                                                 | Ericales     | Lecythidaceae  | KC628360        | KC627712        |
| <i>Rhigozum obovatum</i> Burch.                                                    | Lamiales     | Bignoniaceae   | JX572923        | JX517487        |
| <i>Rhigozum zambesiicum</i> Baker                                                  | Lamiales     | Bignoniaceae   | JX572924        | JX517751        |
| <i>Rhizophora mucronata</i> Lam.                                                   | Malpighiales | Rhizophoraceae | KF147509        | KF147436        |
| <i>Rhodognaphalon schumannianum</i> A.Robyns.                                      | Malvales     | Malvaceae      | JX572336        | JX517920        |
| <i>Rhoicissus digitata</i> (L. f.) Gilg & M. Brandt                                | Vitales      | Vitaceae       | JX572925        | JX518018        |
| <i>Rhoicissus revoilii</i> Planch.                                                 | Vitales      | Vitaceae       | JX572926        | JX517321        |
| <i>Rhoicissus</i> sp. nov. A                                                       | Vitales      | Vitaceae       | JX572928        | JX517692        |
| <i>Rhoicissus tomentosa</i> (Lam.) Wild & R.B. Drumm.                              | Vitales      | Vitaceae       | JF265573        | JF270916        |
| <i>Rhoicissus tridentata</i> (L. f.) Wild & R.B. Drumm.                            | Vitales      | Vitaceae       | JQ025083        | JQ024991        |
| <i>Rhynchocalyx lawsonioides</i> Oliv.                                             | Myrtales     | Penaeaceae     | JX572931        | JX517938        |
| <i>Rhynchosia monophylla</i> Schltr.                                               | Fabales      | Fabaceae       | KF147510        | KF147437        |
| <i>Rinorea angustifolia</i> (Thouars) Baill.                                       | Malpighiales | Violaceae      | JX572932        | JX517564        |
| <i>Rinorea cauliflora</i> (Oliv.) Kuntze                                           | Malpighiales | Violaceae      | KC628261        | KC627635        |

|                                                              |              |              |                 |                 |
|--------------------------------------------------------------|--------------|--------------|-----------------|-----------------|
| <i>Rinorea cf. woermanniana</i> (Büttner) Engl.              | Malpighiales | Violaceae    | KC628108        | -               |
| <i>Rinorea crassifolia</i> (Baker f.) De Wild.               | Malpighiales | Violaceae    | KC628570        | KC627864        |
| <i>Rinorea dentata</i> (P.Beauv.) Kuntze                     | Malpighiales | Violaceae    | KC628078        | KC627504        |
| <i>Rinorea domatiosa</i> A.E.van Wyk                         | Malpighiales | Violaceae    | JX573115        | JX905954        |
| <i>Rinorea elliptica</i> (Oliv.) Kuntze                      | Malpighiales | Violaceae    | JX572933        | JX517999        |
| <i>Rinorea gabunensis</i> Engl.                              | Malpighiales | Violaceae    | KC628321        | KC627681        |
| <i>Rinorea ilicifolia</i> (Welw. ex Oliv.) Kuntze            | Malpighiales | Violaceae    | -               | AB354504        |
| <i>Rinorea kamerunensis</i> Engl.                            | Malpighiales | Violaceae    | KC628486        | -               |
| <i>Rinorea leiophylla</i> M.Brandt                           | Malpighiales | Violaceae    | KC628552        | -               |
| <i>Rinorea lepidobotrys</i> Mildbr.                          | Malpighiales | Violaceae    | KC628568        | KC627862        |
| <i>Rinorea oblongifolia</i> (C.H.Wright) Marqua              | Malpighiales | Violaceae    | KC628213        | -               |
| <i>Rinorea subintegrifolia</i> (P.Beauv.) Kuntze             | Malpighiales | Violaceae    | KC628270        | KC627641        |
| <i>Rinorea thomasii</i> Achoundong ined.                     | Malpighiales | Violaceae    | KC628579        | KC627870        |
| <i>Ritchiea capparoides</i> (Andrews) Britten                | Brassicales  | Capparaceae  | KF147511        | KF147438        |
| <i>Ritchiea pygmaea</i> (Gilg) DeWolf                        | Brassicales  | Capparaceae  | KF147512        | KF147439        |
| <i>Robsonodendron euclifforme</i> (Eckl. & Zeyh.) R.H.Archer | Celastrales  | Celastraceae | JX572935        | JX517361        |
| <i>Robsonodendron maritimum</i> (Bolus) R.H.Archer           | Celastrales  | Celastraceae | -               | JX518231        |
| <i>Rothea myricoides</i> (Hochst.) Steane & Mabb.            | Lamiales     | Lamiaceae    | JX572937        | JX517676        |
| <i>Rothmannia capensis</i> Thunb.                            | Gentianales  | Rubiaceae    | JX572938        | JX517592        |
| <i>Rothmannia engleriana</i> (K.Schum.) Keay                 | Gentianales  | Rubiaceae    | <b>KU567984</b> | -               |
| <i>Rothmannia fischeri</i> (K.Schum.) Bullock ex Oberm.      | Gentianales  | Rubiaceae    | JX572939        | JX518115        |
| <i>Rothmannia globosa</i> (Hochst.) Keay                     | Gentianales  | Rubiaceae    | JX572940        | JX517976        |
| <i>Rothmannia hispida</i> (K.Schum.) Fagerl.                 | Gentianales  | Rubiaceae    | KC628205        | KC627597        |
| <i>Rothmannia manganjae</i> (Hiern) Keay                     | Gentianales  | Rubiaceae    | -               | JX517759        |
| <i>Rothmannia talbotii</i> (Wernham) Keay                    | Gentianales  | Rubiaceae    | KC628601        | KC627888        |
| <i>Rourea orientalis</i> Baill.                              | Oxalidales   | Connaraceae  | JX572941        | JX518032        |
| <i>Ruspolia hypocrateriformis</i> (Vahl) Milne-Redh.         | Lamiales     | Acanthaceae  | JX572942        | JX517979        |
| <i>Ruttya ovata</i> Harv.                                    | Lamiales     | Acanthaceae  | JF265578        | JF270921        |
| <i>Rytigynia celastroides</i> (Baill.) Verdc.                | Gentianales  | Rubiaceae    | <b>KU568072</b> | <b>KX146294</b> |
| <i>Rytigynia macrura</i> Verdc.                              | Gentianales  | Rubiaceae    | <b>KU568158</b> | <b>KX146373</b> |
| <i>Rytigynia orbicularis</i> (K.Schum.) Robyns               | Gentianales  | Rubiaceae    | <b>KU567992</b> | <b>KX146224</b> |
| <i>Rytigynia uhligii</i> (K.Schum. & K.Krause) Verdc.        | Gentianales  | Rubiaceae    | <b>KU567985</b> | -               |
| <i>Rytigynia umbellulata</i> (Hiern) Robyns                  | Gentianales  | Rubiaceae    | <b>KU568051</b> | <b>KX146274</b> |
| <i>Saba comorensis</i> (Bojer ex A.DC.) Pichon               | Gentianales  | Apocynaceae  | <b>KU568086</b> | <b>KX146308</b> |
| <i>Salacia bussei</i> Loes.                                  | Celastrales  | Celastraceae | <b>KU568065</b> | <b>KX146288</b> |
| <i>Salacia gerrardii</i> Harv. & Sprague                     | Celastrales  | Celastraceae | JX572944        | JX517567        |
| <i>Salacia kraussii</i> (Harv.) Harv.                        | Celastrales  | Celastraceae | JF265579        | JF270922        |
| <i>Salacia lehmbachii</i> Loes.                              | Celastrales  | Celastraceae | KC628512        | KC627825        |
| <i>Salacia loloensis</i> Loes.                               | Celastrales  | Celastraceae | KC627973        | KC627425        |
| <i>Salacia rehmannii</i> Schinz                              | Celastrales  | Celastraceae | KF147513        | KF147440        |
| <i>Salix mucronata</i> Thunb.                                | Malpighiales | Salicaceae   | JF265580        | JF270923        |

|                                                                              |              |               |                 |                 |
|------------------------------------------------------------------------------|--------------|---------------|-----------------|-----------------|
| <i>Salvadora australis</i> Schweick.                                         | Brassicales  | Salvadoraceae | JF265581        | JF270924        |
| <i>Salvadora persica</i> Wall.                                               | Brassicales  | Salvadoraceae | JF265582        | JF270925        |
| <i>Santiria trimera</i> (Oliv.) Aubrév.                                      | Sapindales   | Burseraceae   | KC628481        | KC627802        |
| <i>Sapium ellipticum</i> (Hochst.) Pax                                       | Malpighiales | Euphorbiaceae | KC628495        | KC627812        |
| <i>Scaphopetalum blackii</i> Mast.                                           | Malvales     | Malvaceae     | KC628093        | KC627511        |
| <i>Schefflera goetzenii</i> Harms                                            | Apiales      | Araliaceae    | -               | KF147441        |
| <i>Schefflera umbellifera</i> (Sond.) Baill.                                 | Apiales      | Araliaceae    | JX572950        | JX517700        |
| <i>Schinziophyton rautanenii</i> (Schinz) Radcl.-Sm.                         | Malpighiales | Euphorbiaceae | JX572953        | JX518188        |
| <i>Schotia afra</i> (L.) Thunb.                                              | Fabales      | Fabaceae      | JX572954        | JX517439        |
| <i>Schotia brachypetala</i> Sond.                                            | Fabales      | Fabaceae      | JQ025087        | JQ024995        |
| <i>Schotia capitata</i> Bolle                                                | Fabales      | Fabaceae      | JF265584        | JF270927        |
| <i>Schotia latifolia</i> Jacq.                                               | Fabales      | Fabaceae      | -               | EU362039        |
| <i>Schrebera alata</i> (Hochst.) Welw.                                       | Lamiales     | Oleaceae      | JX572955        | JX517941        |
| <i>Schrebera trichoclada</i> Welw.                                           | Lamiales     | Oleaceae      | JX572956        | JX517454        |
| <i>Schumanniophyton magnificum</i> (K.Schum.) Harms                          | Gentianales  | Rubiaceae     | KC627963        | KC627418        |
| <i>Sclerocarya birrea</i> subsp. <i>caffra</i> (Sond.) Kokwaro               | Sapindales   | Anacardiaceae | JF265586        | JF270929        |
| <i>Sclerochiton harveyanus</i> Nees                                          | Lamiales     | Acanthaceae   | JX572957        | JX517343        |
| <i>Sclerochiton kirkii</i> (T. Anderson) C.B. Clarke                         | Lamiales     | Acanthaceae   | JX572958        | JX518192        |
| <i>Sclerocroton integerrimus</i> Hochst.                                     | Malpighiales | Euphorbiaceae | JX572947        | JX517685        |
| <i>Scolopia mundii</i> Warb.                                                 | Malpighiales | Salicaceae    | JX572959        | JX517610        |
| <i>Scolopia stolzii</i> Gilg                                                 | Malpighiales | Salicaceae    | JX572960        | JX518217        |
| <i>Scolopia zeyheri</i> (Nees) Szyszyl.                                      | Malpighiales | Salicaceae    | JX572945        | JX517872        |
| <i>Scorodophloeus fischeri</i> (Taub.) J.Leonard                             | Fabales      | Fabaceae      | <b>KU568105</b> | <b>KX146324</b> |
| <i>Scorodophloeus torrei</i> Lock                                            | Fabales      | Fabaceae      | <b>KU568123</b> | <b>KX146341</b> |
| <i>Scottellia klaineana</i> Pierre                                           | Malpighiales | Achariaceae   | KC628440        | KC627772        |
| <i>Scutia myrtina</i> (Burm. f.) Kurz                                        | Rosales      | Rhamnaceae    | JX572961        | JX517733        |
| <i>Scytopetalum klaineanum</i> Pierre ex Engl.                               | Ericales     | Lecythidaceae | KC627975        | KC627427        |
| <i>Searsia acocksii</i> (Moffett) Moffett                                    | Sapindales   | Anacardiaceae | JX572962        | JX517985        |
| <i>Searsia angustifolia</i> (L.) F.A.Barkley                                 | Sapindales   | Anacardiaceae | JX572963        | JX517801        |
| <i>Searsia chirindensis</i> (Baker f.) Moffett                               | Sapindales   | Anacardiaceae | JX572964        | JX517658        |
| <i>Searsia ciliata</i> (Licht. ex Schult.) A.J.Mill.                         | Sapindales   | Anacardiaceae | <b>KU568043</b> | <b>KX146267</b> |
| <i>Searsia crenata</i> (Thunb.) Moffett                                      | Sapindales   | Anacardiaceae | JX572965        | JX517881        |
| <i>Searsia dentata</i> (Thunb.) F.A.Barkley                                  | Sapindales   | Anacardiaceae | KF147514        | -               |
| <i>Searsia discolor</i> (E.Mey. ex Sond.) Moffett                            | Sapindales   | Anacardiaceae | KF147515        | KF147442        |
| <i>Searsia fanshawei</i> (R.Fern. & A.Fern.) Moffett                         | Sapindales   | Anacardiaceae | <b>KU568018</b> | <b>KX146245</b> |
| <i>Searsia fastigiata</i> (Eckl. & Zeyh.) Moffett                            | Sapindales   | Anacardiaceae | JX572966        | JX517893        |
| <i>Searsia glauca</i> (Thunb.) Moffett                                       | Sapindales   | Anacardiaceae | -               | KF227400        |
| <i>Searsia gueinzii</i> (Sond.) F.A.Barkley                                  | Sapindales   | Anacardiaceae | JX572967        | JX517709        |
| <i>Searsia incisa</i> (L.f.) F.A.Barkley                                     | Sapindales   | Anacardiaceae | JX572968        | JX517587        |
| <i>Searsia kirkii</i> (Oliv.) Moffett                                        | Sapindales   | Anacardiaceae | <b>KU568063</b> | <b>KX146286</b> |
| <i>Searsia laevigata</i> (L.) F.A.Barkley                                    | Sapindales   | Anacardiaceae | JX572969        | JX518086        |
| <i>Searsia laevinata</i> (L.) F.A.Barkley var. <i>villosa</i> (L.f.) Moffett | Sapindales   | Anacardiaceae | IN417470        | -               |

|                                                                                                                 |            |               |                 |                 |
|-----------------------------------------------------------------------------------------------------------------|------------|---------------|-----------------|-----------------|
| <i>Searsia leucogata</i> (L.) F.A.Barkley var. <i>virosa</i> (L.) Moffett                                       | Sapindales | Anacardiaceae | JX14740         | -               |
| <i>Searsia lancea</i> (L. f.) F.A. Barkley                                                                      | Sapindales | Anacardiaceae | JX572970        | JX518157        |
| <i>Searsia leptodictya</i> (Diels) T.S.Yi, A.J.Mill. & J.Wen                                                    | Sapindales | Anacardiaceae | JX572971        | JX517890        |
| <i>Searsia longispina</i> (Eckl. & Zeyh.) Moffett                                                               | Sapindales | Anacardiaceae | JX572972        | JX517438        |
| <i>Searsia lucida</i> (L.) F.A.Barkley                                                                          | Sapindales | Anacardiaceae | <b>KM894214</b> | <b>KM896892</b> |
| <i>Searsia magalismontana</i> (Sond.) Moffett                                                                   | Sapindales | Anacardiaceae | JF265591        | JF270934        |
| <i>Searsia natalensis</i> (Bernh. ex C.Krauss) F.A.Barkley                                                      | Sapindales | Anacardiaceae | JX572973        | JX518140        |
| <i>Searsia nebulosa</i> (Schönland) Moffett                                                                     | Sapindales | Anacardiaceae | JX572974        | JX517862        |
| <i>Searsia pallens</i> (Eckl. & Zeyh.) Moffett                                                                  | Sapindales | Anacardiaceae | <b>KM894259</b> | <b>KM896930</b> |
| <i>Searsia pendulina</i> (Jacq.) Moffett                                                                        | Sapindales | Anacardiaceae | JX572975        | JX517444        |
| <i>Searsia pentheri</i> (Zahlbr.) Moffett                                                                       | Sapindales | Anacardiaceae | JX572976        | JX517813        |
| <i>Searsia pondoensis</i> (Schönland) Moffett                                                                   | Sapindales | Anacardiaceae | KF147516        | KF147443        |
| <i>Searsia pygmaea</i> (Moffett) Moffett                                                                        | Sapindales | Anacardiaceae | KF147517        | -               |
| <i>Searsia pyroides</i> (Burch.) Moffett                                                                        | Sapindales | Anacardiaceae | JX572977        | JX517333        |
| <i>Searsia pyroides</i> var. <i>integrifolia</i> (Engl.) Moffett.                                               | Sapindales | Anacardiaceae | JX572929        | JX517483        |
| <i>Searsia transvaalensis</i> (Engl.) Moffett                                                                   | Sapindales | Anacardiaceae | JX572930        | JX518204        |
| <i>Searsia tumulicola</i> (S.Moore) Moffett                                                                     | Sapindales | Anacardiaceae | KF147519        | KF147445        |
| <i>Searsia tumulicola</i> (S.Moore) Moffett var. <i>meeuseana</i> (R. & A.Fern.) Moffett forma <i>meeuseana</i> | Sapindales | Anacardiaceae | KF147518        | KF147444        |
| <i>Searsia undulata</i> (Jacq.) T.S.Yi, A.J.Mill. & J.Wen                                                       | Sapindales | Anacardiaceae | JQ025088        | JQ024996        |
| <i>Searsia wilmsii</i> (Diels) Moffett                                                                          | Sapindales | Anacardiaceae | KF147520        | KF147446        |
| <i>Searsia zeyheri</i> (Sond.) Moffett                                                                          | Sapindales | Anacardiaceae | JX572979        | JX905948        |
| <i>Securidaca longipedunculata</i> Fresen.                                                                      | Fabales    | Polygalaceae  | JX572980        | JX517755        |
| <i>Seemannaralia gerrardii</i> (Seem.) R.Vig.                                                                   | Apiales    | Araliaceae    | JX572981        | JX517534        |
| <i>Senegalia adenocalyx</i> Brenan & Exell                                                                      | Fabales    | Fabaceae      | JX572179        | JX518166        |
| <i>Senegalia ataxacantha</i> DC.                                                                                | Fabales    | Fabaceae      | JX572182        | JX517415        |
| <i>Senegalia brevispica</i> Harms                                                                               | Fabales    | Fabaceae      | JF265244        | JF270602        |
| <i>Senegalia burkei</i> Benth.                                                                                  | Fabales    | Fabaceae      | JX572186        | JX517664        |
| <i>Senegalia caffra</i> (Thunb.) Willd.                                                                         | Fabales    | Fabaceae      | JX572187        | JX518058        |
| <i>Senegalia chariessa</i> Milne-Redh.                                                                          | Fabales    | Fabaceae      | JX572188        | JX518001        |
| <i>Senegalia cinerea</i> Schinz                                                                                 | Fabales    | Fabaceae      | JX572193        | JX517897        |
| <i>Senegalia eriocarpa</i> Brenan                                                                               | Fabales    | Fabaceae      | JX572191        | JX518050        |
| <i>Senegalia erubescens</i> Oliv.                                                                               | Fabales    | Fabaceae      | JF265248        | JF270605        |
| <i>Senegalia galpinii</i> Burt Davy                                                                             | Fabales    | Fabaceae      | JX572194        | JX518092        |
| <i>Senegalia goetzei</i> subsp. <i>goetzei</i> Harms                                                            | Fabales    | Fabaceae      | JX572196        | JX517303        |
| <i>Senegalia goetzei</i> subsp. <i>microphylla</i> Brenan                                                       | Fabales    | Fabaceae      | -               | JQ230131        |
| <i>Senegalia hereroensis</i> Engl.                                                                              | Fabales    | Fabaceae      | JX572202        | JX517996        |
| <i>Senegalia kraussiana</i> Benth.                                                                              | Fabales    | Fabaceae      | JX572206        | JX517710        |
| <i>Senegalia mellifera</i> (M.Vahl) Benth.                                                                      | Fabales    | Fabaceae      | JX572212        | JX518210        |
| <i>Senegalia mellifera</i> subsp. <i>detinens</i> (Burch.) Brenan                                               | Fabales    | Fabaceae      | JX572211        | JX517310        |
| <i>Senegalia montis-usti</i> Merxm. & A.Schreib.                                                                | Fabales    | Fabaceae      | JX572213        | JX517640        |
| <i>Senegalia nigrescens</i> Oliv.                                                                               | Fabales    | Fabaceae      | JX572216        | JX518103        |

|                                                                                  |              |                |                 |                 |
|----------------------------------------------------------------------------------|--------------|----------------|-----------------|-----------------|
| <i>Senegalia polyacantha</i> subsp. <i>campylacantha</i> (A.Rich.) Brenan        | Fabales      | Fabaceae       | -               | GQ872241        |
| <i>Senegalia reficiens</i> Wawra                                                 | Fabales      | Fabaceae       | JX572220        | JX518096        |
| <i>Senegalia robynsiana</i> Merxm. & A.Schreib.                                  | Fabales      | Fabaceae       | JX572224        | JX517895        |
| <i>Senegalia schweinfurthii</i> Brenan & Exell                                   | Fabales      | Fabaceae       | JX572225        | JX517495        |
| <i>Senegalia senegal</i> (L.) Willd.                                             | Fabales      | Fabaceae       | JF265258        | JF270615        |
| <i>Senegalia senegal</i> var. <i>leiorhachis</i> Brenan                          | Fabales      | Fabaceae       | JX572227        | JX517568        |
| <i>Senegalia welwitschii</i> subsp. <i>delagoensis</i> (Harms) J.H.Ross & Brenan | Fabales      | Fabaceae       | JX572234        | JX518159        |
| <i>Senna petersiana</i> (Bolle) Lock                                             | Fabales      | Fabaceae       | JX572982        | JX517765        |
| <i>Sericanthe andongensis</i> (Hiern) Robbr.                                     | Gentianales  | Rubiaceae      | <b>KU568137</b> | <b>KX146352</b> |
| <i>Sericanthe suffruticosa</i> (Hutch.) Robbr.                                   | Gentianales  | Rubiaceae      | <b>KU568046</b> | <b>KX146269</b> |
| <i>Seriphium plumosum</i> L.                                                     | Asterales    | Asteraceae     | JX572997        | JX517389        |
| <i>Sesamothamnus lugardii</i> N.E.Br. ex Stapf                                   | Lamiales     | Pedaliaceae    | JF265597        | JF270939        |
| <i>Sesbania punicea</i> (Cav.) Benth.                                            | Fabales      | Fabaceae       | <b>KM894206</b> | -               |
| <i>Shirakiopsis elliptica</i> (Hochst.) Esser                                    | Malpighiales | Euphorbiaceae  | JX572946        | JX517498        |
| <i>Sibangea similis</i> (Hutch.) Radcl.-Sm.                                      | Malpighiales | Putranjivaceae | KC628543        | -               |
| <i>Sideroxylon inerme</i> subsp. <i>inerme</i>                                   | Ericales     | Sapotaceae     | JX572985        | JX517620        |
| <i>Smelophyllum capense</i> Radlk.                                               | Sapindales   | Sapindaceae    | AM235131        | AY724330        |
| <i>Solanecio mannii</i> (Hook.f.) C.Jeffrey                                      | Asterales    | Asteraceae     | -               | AF459994        |
| <i>Solanum aculeastrum</i> Dunal                                                 | Solanales    | Solanaceae     | JQ025091        | JQ024998        |
| <i>Solanum catombelense</i> Peyr.                                                | Solanales    | Solanaceae     | JF265599        | JF270941        |
| <i>Solanum giganteum</i> Jacq.                                                   | Solanales    | Solanaceae     | JX572986        | JX517374        |
| <i>Solanum lichtensteinii</i> Willd.                                             | Solanales    | Solanaceae     | JF265600        | JF270942        |
| <i>Solanum panduriforme</i> E. Mey.                                              | Solanales    | Solanaceae     | JF265601        | JF270943        |
| <i>Sonneratia alba</i> Sm.                                                       | Myrtales     | Lythraceae     | -               | EF408669        |
| <i>Sophora inhambanensis</i> Klotzsch                                            | Fabales      | Fabaceae       | <b>KM894237</b> | <b>KM896910</b> |
| <i>Sophora tomentosa</i> L.                                                      | Fabales      | Fabaceae       | <b>KU568085</b> | <b>KX146307</b> |
| <i>Sorindeia juglandifolia</i> (A.Rich.) Planch. ex Oliv.                        | Sapindales   | Anacardiaceae  | KC628182        | KC627577        |
| <i>Soyauxia gabonensis</i> Oliv.                                                 | Saxifragales | Peridiscaceae  | KC628446        | KC627777        |
| <i>Sparmannia africana</i> L.f.                                                  | Malvales     | Malvaceae      | -               | AY321194        |
| <i>Spirostachys africana</i> Sond.                                               | Malpighiales | Euphorbiaceae  | JX572988        | JX517519        |
| <i>Stadmania oppositifolia</i> Lam.                                              | Sapindales   | Sapindaceae    | JF265603        | JF270945        |
| <i>Stangeria eriopus</i> (Kunze) Baill.                                          | Cycadales    | Stangeriaceae  | JQ025707        | JQ046267        |
| <i>Staudtia kamerunensis</i> Warb.                                               | Magnoliales  | Myristicaceae  | KC628454        | KC627785        |
| <i>Steganotaenia araliacea</i> Hochst.                                           | Apiales      | Apiaceae       | JX572989        | JX517647        |
| <i>Sterculia africana</i> (Lour.) Fiori                                          | Malvales     | Malvaceae      | JX572990        | JX517698        |
| <i>Sterculia alexandri</i> Harv.                                                 | Malvales     | Malvaceae      | JX572991        | JX517774        |
| <i>Sterculia appendiculata</i> K.Schum. ex Engl.                                 | Malvales     | Malvaceae      | JX572992        | JX517368        |
| <i>Sterculia murex</i> Hemsl.                                                    | Malvales     | Malvaceae      | JX572993        | JX517910        |
| <i>Sterculia quinqueloba</i> (Garcke) K.Schum.                                   | Malvales     | Malvaceae      | JX572994        | JX518037        |
| <i>Sterculia rogersii</i> N.E.Br.                                                | Malvales     | Malvaceae      | JF265606        | JF270948        |
| <i>Stereospermum kunthianum</i> Cham.                                            | Lamiales     | Bignoniaceae   | JX572995        | JX517630        |
| <i>Stirtonanthus chrysanthus</i> (Adamson) B.-E.van Wyk & A.L.Sc                 | Fabales      | Fabaceae       | <b>KM894252</b> | <b>KM896922</b> |

|                                                      |                |                |                 |                 |
|------------------------------------------------------|----------------|----------------|-----------------|-----------------|
| <i>Stoeberia utilis</i> (L.Bolus) van Jaarsv.        | Caryophyllales | Aizoaceae      | JX572996        | JX518027        |
| <i>Streblus</i> Lour.                                | Rosales        | Moraceae       | -               | GQ434235        |
| <i>Strelitzia alba</i> (L.f.) Skeels                 | Zingiberales   | Strelitziaceae | -               | AF434874        |
| <i>Strelitzia nicolai</i> Regel & K.Koch             | Zingiberales   | Strelitziaceae | JX572998        | JX517866        |
| <i>Strephonema mannii</i> Hook.f.                    | Myrtales       | Combretaceae   | KC628112        | -               |
| <i>Strephonema pseudocolum</i> A.Chev.               | Myrtales       | Combretaceae   | KC628099        | KC627515        |
| <i>Strephonema sericeum</i> Hook.f.                  | Myrtales       | Combretaceae   | KC628206        | KC627598        |
| <i>Strombosia grandifolia</i> Hook.f.                | Santalales     | Olacaceae      | KC628507        | KC627821        |
| <i>Strombosia pustulata</i> Oliv.                    | Santalales     | Olacaceae      | KC628157        | KC627555        |
| <i>Strombosia scheffleri</i> Engl.                   | Santalales     | Olacaceae      | KC628116        | KC627526        |
| <i>Strombosiopsis sereinii</i> Breteler              | Santalales     | Olacaceae      | KC627944        | -               |
| <i>Strombosiopsis tetrandra</i> Engl.                | Santalales     | Olacaceae      | KC628571        | -               |
| <i>Strophanthus courmontii</i> Sacleux ex Franch.    | Gentianales    | Apocynaceae    | <b>KU568141</b> | <b>KX146356</b> |
| <i>Strophanthus kombe</i> Oliv.                      | Gentianales    | Apocynaceae    | JX572999        | JX517906        |
| <i>Strophanthus petersianus</i> Klotzsch             | Gentianales    | Apocynaceae    | JF265608        | JF270950        |
| <i>Strophanthus speciosus</i> (Ward & Harv.) Reber   | Gentianales    | Apocynaceae    | JX573000        | JX517730        |
| <i>Strychnos cocculoides</i> Baker                   | Gentianales    | Loganiaceae    | JX573001        | JX517336        |
| <i>Strychnos decussata</i> (Pappe) Gilg              | Gentianales    | Loganiaceae    | JX573002        | JX517983        |
| <i>Strychnos gerrardii</i> N.E. Br.                  | Gentianales    | Loganiaceae    | -               | <b>KX146251</b> |
| <i>Strychnos henningsii</i> Gilg                     | Gentianales    | Loganiaceae    | JX573003        | JX518189        |
| <i>Strychnos innocua</i> Delile                      | Gentianales    | Loganiaceae    | <b>KU568140</b> | -               |
| <i>Strychnos madagascariensis</i> Poir.              | Gentianales    | Loganiaceae    | JX573004        | JX517867        |
| <i>Strychnos mitis</i> S.Moore                       | Gentianales    | Loganiaceae    | -               | JX518090        |
| <i>Strychnos myrtoides</i> Gilg & Busse              | Gentianales    | Loganiaceae    | <b>KU568041</b> | <b>KX146266</b> |
| <i>Strychnos panganensis</i> Gilg                    | Gentianales    | Loganiaceae    | JX573005        | JX517363        |
| <i>Strychnos potatorum</i> L.f.                      | Gentianales    | Loganiaceae    | JX573006        | JX517683        |
| <i>Strychnos pungens</i> Soler.                      | Gentianales    | Loganiaceae    | JF265612        | JF270954        |
| <i>Strychnos spinosa</i> Lam.                        | Gentianales    | Loganiaceae    | JX573007        | JX517766        |
| <i>Strychnos usambarensis</i> Gilg                   | Gentianales    | Loganiaceae    | JX573008        | JX517734        |
| <i>Strychnos xantha</i> Leeuwenb.                    | Gentianales    | Loganiaceae    | JX573009        | JX517510        |
| <i>Suregada africana</i> (Sond.) Müll.Arg.           | Malpighiales   | Euphorbiaceae  | JF265615        | JF270957        |
| <i>Suregada procera</i> (Prain) Croizat              | Malpighiales   | Euphorbiaceae  | JX573010        | JX518080        |
| <i>Suregada zanzibariensis</i> Baill.                | Malpighiales   | Euphorbiaceae  | JX573011        | JX518191        |
| <i>Suriana maritima</i> L.                           | Fabales        | Surianaceae    | <b>KU568066</b> | <b>KX146289</b> |
| <i>Symphonia globulifera</i> L.f.                    | Malpighiales   | Clusiaceae     | KC628598        | KC627885        |
| <i>Synadenium cupulare</i> L.C. Wheeler              | Malpighiales   | Euphorbiaceae  | JQ025098        | JQ025004        |
| <i>Synadenium kirkii</i> N.E.Br.                     | Malpighiales   | Euphorbiaceae  | JX573012        | JX905960        |
| <i>Synaptolepis alternifolia</i> Oliv.               | Malvales       | Thymelaeaceae  | JX573013        | JX518008        |
| <i>Synaptolepis oliveriana</i> Gilg                  | Malvales       | Thymelaeaceae  | <b>KU568025</b> | <b>KX146249</b> |
| <i>Syncolostemon albiflorus</i> (N.E.Br.) D.F.Otieno | Lamiales       | Lamiaceae      | -               | JX517856        |
| <i>Synsepalum brevipes</i> (Baker) T.D.Penn.         | Ericales       | Sapotaceae     | JX573014        | JX517918        |
| <i>Synsepalum passargei</i> (Engl.) T.D.Penn.        | Ericales       | Sapotaceae     | JX573015        | JX517799        |

|                                                                                |                |                 |                 |                 |
|--------------------------------------------------------------------------------|----------------|-----------------|-----------------|-----------------|
| <i>Synsepalum stipulatum</i> (Radlk.) Engl.                                    | Ericales       | Sapotaceae      | KC628111        | KC627523        |
| <i>Syzygium cordatum</i> Hochst. ex Krauss                                     | Myrtales       | Myrtaceae       | JX573016        | JX517332        |
| <i>Syzygium gerrardii</i> (Harv. ex Hook.f.) Burtt Davy                        | Myrtales       | Myrtaceae       | JX573017        | JX517397        |
| <i>Syzygium guineense</i> (Willd.) DC.                                         | Myrtales       | Myrtaceae       | JX573018        | JX517609        |
| <i>Syzygium guineense</i> subsp. <i>afromontana</i> F. White                   | Myrtales       | Myrtaceae       | JX573021        | JX517489        |
| <i>Syzygium guineense</i> subsp. <i>barotsense</i> F. White                    | Myrtales       | Myrtaceae       | JX573019        | JX517990        |
| <i>Syzygium guineense</i> subsp. <i>macrocarpum</i> (Engl.) F. White           | Myrtales       | Myrtaceae       | JX573020        | JX517695        |
| <i>Syzygium legatii</i> Burtt Davy & Greenway                                  | Myrtales       | Myrtaceae       | JX573022        | JX518187        |
| <i>Syzygium masukuense</i> (Baker) R.E.Fr.                                     | Myrtales       | Myrtaceae       | -               | DQ088591        |
| <i>Syzygium pondoense</i> Engl.                                                | Myrtales       | Myrtaceae       | JX573023        | JX518226        |
| <i>Syzygium rowlandii</i> Sprague                                              | Myrtales       | Myrtaceae       | KC627942        | -               |
| <i>Syzygium staudtii</i> (Engl.) Mildbr.                                       | Myrtales       | Myrtaceae       | KC628184        | -               |
| <i>Tabernaemontana brachyantha</i> Stapf                                       | Gentianales    | Apocynaceae     | KC628054        | KC627483        |
| <i>Tabernaemontana crassa</i> Benth.                                           | Gentianales    | Apocynaceae     | KC628637        | KC627912        |
| <i>Tabernaemontana elegans</i> Stapf                                           | Gentianales    | Apocynaceae     | JX573024        | JX517818        |
| <i>Tabernaemontana ventricosa</i> Hochst. ex A.DC.                             | Gentianales    | Apocynaceae     | JX573025        | JX518222        |
| <i>Tacazzea apiculata</i> Oliv.                                                | Gentianales    | Apocynaceae     | AJ419764        | AY899945        |
| <i>Talbotiella korupensis</i> Mackinder & Wieringa                             | Fabales        | Fabaceae        | KC628406        | KC627749        |
| <i>Tamarindus indica</i> L.                                                    | Fabales        | Fabaceae        | JX573026        | JX517967        |
| <i>Tamarix usneoides</i> E.Mey. ex Bunge                                       | Caryophyllales | Tamaricaceae    | JX573027        | JX517452        |
| <i>Tannodia swynnertonii</i> (S.Moore) Prain                                   | Malpighiales   | Euphorbiaceae   | JX573028        | JX517763        |
| <i>Tannodia tenuifolia</i> (Pax) Prain                                         | Malpighiales   | Euphorbiaceae   | <b>KU568006</b> | <b>KX146235</b> |
| <i>Tapiphyllum velutinum</i> Robyns                                            | Gentianales    | Rubiaceae       | <b>KU568044</b> | <b>KX146268</b> |
| <i>Tapura africana</i> Oliv.                                                   | Malpighiales   | Dichapetalaceae | KC628511        | -               |
| <i>Tapura fischeri</i> Engl.                                                   | Malpighiales   | Dichapetalaceae | JX572337        | JX518005        |
| <i>Tarchonanthus camphoratus</i> L.                                            | Asterales      | Asteraceae      | JQ025099        | JQ025005        |
| <i>Tarchonanthus trilobus</i> DC.                                              | Asterales      | Asteraceae      | JX573029        | JX517783        |
| <i>Tarchonanthus trilobus</i> var. <i>galpinii</i> (Hutch. & E.Phillips) Paiva | Asterales      | Asteraceae      | <b>KU568038</b> | <b>KX146262</b> |
| <i>Tarenna longipedicellata</i> (J.G.García) Bridson                           | Gentianales    | Rubiaceae       | <b>KU568138</b> | <b>KX146353</b> |
| <i>Tarenna pavettoides</i> (Harv.) Sim                                         | Gentianales    | Rubiaceae       | JX573030        | JX517414        |
| <i>Teclea gerrardii</i> Verd.                                                  | Sapindales     | Rutaceae        | JX573031        | JX517313        |
| <i>Teclea natalensis</i> Engl.                                                 | Sapindales     | Rutaceae        | JX573032        | JX518224        |
| <i>Tecomaria capensis</i> (Thunb.) Spach                                       | Lamiales       | Bignoniaceae    | JX573033        | JX517434        |
| <i>Tephrosia pondoensis</i> (Codd) Schrire                                     | Fabales        | Fabaceae        | JX573035        | JX517379        |
| <i>Terminalia brachystemma</i> Welw. ex Hiern                                  | Myrtales       | Combretaceae    | FJ381810        | JX518028        |
| <i>Terminalia mollis</i> M.A.Lawson                                            | Myrtales       | Combretaceae    | JX573037        | JX518150        |
| <i>Terminalia phanerophlebia</i> Engl. & Diels                                 | Myrtales       | Combretaceae    | JX573038        | JX517994        |
| <i>Terminalia prunioides</i> M.A.Lawson                                        | Myrtales       | Combretaceae    | JF265625        | JF270967        |
| <i>Terminalia randii</i> Baker f.                                              | Myrtales       | Combretaceae    | JX573039        | JX518067        |
| <i>Terminalia sambesiaca</i> Engl. & Diels                                     | Myrtales       | Combretaceae    | JX573040        | JX517421        |
| <i>Terminalia sericea</i> Burch. ex DC.                                        | Myrtales       | Combretaceae    | JX573041        | JX517972        |
| <i>Terminalia stenostachya</i> Engl. & Diels                                   | Myrtales       | Combretaceae    | JX573042        | JX517373        |

|                                                                           |              |                |                 |                 |
|---------------------------------------------------------------------------|--------------|----------------|-----------------|-----------------|
| <i>Terminalia stuhlmannii</i> Engl.                                       | Myrtales     | Combretaceae   | <b>KU568099</b> | -               |
| <i>Terminalia trichopoda</i> Diels                                        | Myrtales     | Combretaceae   | JX573043        | JX517390        |
| <i>Tetracera boiviniana</i> Baill.                                        | Dilleniales  | Dilleniaceae   | KF147521        | KF147447        |
| <i>Tetracera masuiana</i> De Wild. & T.Durand                             | Dilleniales  | Dilleniaceae   | KF147522        | KF147448        |
| <i>Tetradenia riparia</i> (Hochst.) Codd                                  | Lamiales     | Lamiaceae      | JF265627        | JF270969        |
| <i>Thamnocalamus tessellatus</i> (Nees) Soderstr. & R.P.Ellis             | Poales       | Poaceae        | JX573044        | JX518203        |
| <i>Thecacoris</i> sp.                                                     | Malpighiales | Phyllanthaceae | KC628465        | KC627794        |
| <i>Thespesia acutiloba</i> (Baker f.) Exell & Mendonca                    | Malvales     | Malvaceae      | JX573045        | JX518214        |
| <i>Thespesiopsis mossambicensis</i> Exell & Hillc.                        | Malvales     | Malvaceae      | <b>KU568139</b> | <b>KX146354</b> |
| <i>Thilachium africanum</i> Scott-Elliot                                  | Brassicales  | Capparaceae    | JX573046        | JX517312        |
| <i>Tiliacora funifera</i> (Miers) Oliv.                                   | Ranunculales | Menispermaceae | JX573047        | JX517404        |
| <i>Tinnea barbata</i> Vollesen                                            | Lamiales     | Lamiaceae      | JX573048        | JX518083        |
| <i>Tinnea rhodesiana</i> S.Moore                                          | Lamiales     | Lamiaceae      | JX573049        | JX518148        |
| <i>Tinospora caffra</i> (Miers) Troupin                                   | Ranunculales | Menispermaceae | JX573050        | JX517395        |
| <i>Tinospora tenera</i> Miers                                             | Ranunculales | Menispermaceae | JX573051        | JX517669        |
| <i>Toddalia asiatica</i> (L.) Lam.                                        | Sapindales   | Rutaceae       | JX573053        | JX518156        |
| <i>Treculia acuminata</i> Baill.                                          | Rosales      | Moraceae       | KC628190        | KC627582        |
| <i>Treculia africana</i> Desc.                                            | Rosales      | Moraceae       | KC628540        | KC627842        |
| <i>Treculia obovoidea</i> N.E.Br.                                         | Rosales      | Moraceae       | KC628408        | KC627751        |
| <i>Trema orientalis</i> (L.) Blume                                        | Rosales      | Ulmaceae       | JX573054        | JX518199        |
| <i>Triainolepis sancta</i> Verdc.                                         | Gentianales  | Rubiaceae      | <b>KU567998</b> | <b>KX146228</b> |
| <i>Triaspis glaucophylla</i> Engl.                                        | Malpighiales | Malpighiaceae  | JX573055        | JX518181        |
| <i>Triaspis hypericoides</i> Burch.                                       | Malpighiales | Malpighiaceae  | JX573056        | JX517622        |
| <i>Triaspis macropteron</i> subsp. <i>massaiensis</i> (Nied.) Launert     | Malpighiales | Malpighiaceae  | <b>KU568102</b> | <b>KX146322</b> |
| <i>Tricalysia achoundongiana</i> Robbr. & Sonké & Kenfack                 | Gentianales  | Rubiaceae      | KC628004        | KC627450        |
| <i>Tricalysia capensis</i> (Meisn. ex Hochst.) Sim                        | Gentianales  | Rubiaceae      | JX573057        | JX517423        |
| <i>Tricalysia coriacea</i> subsp. <i>angustifolia</i> (I.G.García) Robbr. | Gentianales  | Rubiaceae      | KF147523        | KF147449        |
| <i>Tricalysia delagoensis</i> Schinz                                      | Gentianales  | Rubiaceae      | JX573058        | JX517378        |
| <i>Tricalysia griseiflora</i> K.Schum.                                    | Gentianales  | Rubiaceae      | <b>KU568160</b> | <b>KX146375</b> |
| <i>Tricalysia jasmiflora</i> (Klotzsch) Benth. & Hook.f. ex Hiern         | Gentianales  | Rubiaceae      | JX573059        | JX517757        |
| <i>Tricalysia pallens</i> Hiern                                           | Gentianales  | Rubiaceae      | KC628058        | KC627487        |
| <i>Trichillia capitata</i> Klotzsch                                       | Sapindales   | Meliaceae      | JX573063        | JX518085        |
| <i>Trichillia dregeana</i> Sond.                                          | Sapindales   | Meliaceae      | JF265635        | JF270976        |
| <i>Trichillia emetica</i> Vahl                                            | Sapindales   | Meliaceae      | JQ025100        | JQ025007        |
| <i>Trichillia prieuriana</i> A.Juss.                                      | Sapindales   | Meliaceae      | KC627970        | KC627423        |
| <i>Trichocladus crinitus</i> Pers.                                        | Saxifragales | Hamamelidaceae | JX573064        | JX518141        |
| <i>Trichocladus ellipticus</i> Eckl. & Zeyh.                              | Saxifragales | Hamamelidaceae | JX573065        | JX517927        |
| <i>Trichocladus grandiflorus</i> Oliv.                                    | Saxifragales | Hamamelidaceae | JX573066        | JX517614        |
| <i>Trichoscypha acuminata</i> Engl.                                       | Sapindales   | Anacardiaceae  | KC628403        | KC627746        |
| <i>Trichoscypha arborea</i> (A.Chev.) A.Chev.                             | Sapindales   | Anacardiaceae  | KC628094        | KC627512        |
| <i>Trichoscypha klainei</i> Lecomte                                       | Sapindales   | Anacardiaceae  | KC628611        | -               |
| <i>Trichoscypha patens</i> (Oliv.) Engl.                                  | Sapindales   | Anacardiaceae  | KC628299        | KC627664        |

|                                                                |              |                |                 |                 |
|----------------------------------------------------------------|--------------|----------------|-----------------|-----------------|
| <i>Trichoscypha preussii</i> Engl.                             | Sapindales   | Anacardiaceae  | KC628192        | KC627584        |
| <i>Trilepisium madagascariense</i> DC.                         | Rosales      | Moraceae       | <b>KU568109</b> | <b>KX146328</b> |
| <i>Trimeria grandifolia</i> (Hochst.) Warb.                    | Malpighiales | Salicaceae     | JF265637        | JF270978        |
| <i>Triplochiton zambesiacus</i> Milne-Redh.                    | Malvales     | Malvaceae      | JX573068        | JX518093        |
| <i>Turraea floribunda</i> Hochst.                              | Sapindales   | Meliaceae      | JX573069        | JX517433        |
| <i>Turraea nilotica</i> Kotschy & Peyr.                        | Sapindales   | Meliaceae      | JX573070        | JX517345        |
| <i>Turraea obtusifolia</i> Hochst.                             | Sapindales   | Meliaceae      | JF265641        | JF270982        |
| <i>Turraea robusta</i> Gürke                                   | Sapindales   | Meliaceae      | <b>KU568134</b> | <b>KX146349</b> |
| <i>Turraea wakefieldii</i> Oliv.                               | Sapindales   | Meliaceae      | <b>KU568165</b> | <b>KX146380</b> |
| <i>Turraeanthus mannii</i> Baill.                              | Sapindales   | Meliaceae      | KC628095        | KC627513        |
| <i>Tylecodon paniculatus</i> (L.f.) Toelken                    | Saxifragales | Crassulaceae   | JQ412433        | JQ412300        |
| <i>Uapaca guineensis</i> Müll.Arg.                             | Malpighiales | Phyllanthaceae | KC628477        | -               |
| <i>Uapaca kirkiana</i> Müll.Arg.                               | Malpighiales | Phyllanthaceae | <b>KU568166</b> | -               |
| <i>Uapaca nitida</i> Müll.Arg.                                 | Malpighiales | Euphorbiaceae  | KF147524        | -               |
| <i>Uapaca pilosa</i> Hutch.                                    | Malpighiales | Phyllanthaceae | <b>KU568021</b> | -               |
| <i>Uapaca sansibarica</i> Pax                                  | Malpighiales | Euphorbiaceae  | KF147525        | -               |
| <i>Uapaca staudtii</i> Pax                                     | Malpighiales | Phyllanthaceae | KC628129        | -               |
| <i>Umtiza listerana</i> Sim                                    | Fabales      | Fabaceae       | JX573071        | JX517963        |
| <i>Urera trinervis</i> (Hochst.) Friis & Immelman              | Rosales      | Urticaceae     | JX573072        | JX517974        |
| <i>Uvaria caffra</i> E.Mey. ex Sond.                           | Magnoliales  | Annonaceae     | JX573073        | JX517820        |
| <i>Uvaria gracilipes</i> N.Robson                              | Magnoliales  | Annonaceae     | JX573074        | JX517815        |
| <i>Uvaria lucida</i> subsp. <i>virens</i> (N.E.Br.) Verdc.     | Magnoliales  | Annonaceae     | JX572310        | JX517870        |
| <i>Uvariastrum pynaertii</i> De Wild.                          | Magnoliales  | Annonaceae     | KC628283        | KC627652        |
| <i>Uvariadendron connivens</i> (Benth.) R.E. Fr.               | Magnoliales  | Annonaceae     | KC627977        | KC627429        |
| <i>Uvariopsis bakeriana</i> (Hutch. & Dalziel) Robyns & Ghesq. | Magnoliales  | Annonaceae     | KC628178        | KC627573        |
| <i>Uvariopsis korupensis</i> Gereau & Kenfack                  | Magnoliales  | Annonaceae     | KC628268        | KC627640        |
| <i>Vaccinium exul</i> Bolus.                                   | Ericales     | Ericaceae      | <b>KU568131</b> | <b>KX146346</b> |
| <i>Vachellia amythethophylla</i> A.Rich.                       | Fabales      | Fabaceae       | JX572180        | JX518139        |
| <i>Vachellia arenaria</i> Schinz                               | Fabales      | Fabaceae       | JX572181        | JX517408        |
| <i>Vachellia borleae</i> Burt Davy                             | Fabales      | Fabaceae       | JX572185        | JX518132        |
| <i>Vachellia davyi</i> N.E.Br.                                 | Fabales      | Fabaceae       | JF265247        | JF270604        |
| <i>Vachellia dyeri</i> P.P.Sw. ex Coates Palgr                 | Fabales      | Fabaceae       | JX572189        | JX517665        |
| <i>Vachellia erioloba</i> E.Mey.                               | Fabales      | Fabaceae       | JX572192        | JX517384        |
| <i>Vachellia exuvialis</i> Verd.                               | Fabales      | Fabaceae       | JF265249        | JF270606        |
| <i>Vachellia farnesiana</i> (L.) Willd.                        | Fabales      | Fabaceae       | -               | AF523115        |
| <i>Vachellia gerrardii</i> Benth.                              | Fabales      | Fabaceae       | JX572195        | JX517886        |
| <i>Vachellia grandicornuta</i> Gerstner                        | Fabales      | Fabaceae       | JX572197        | JX517869        |
| <i>Vachellia hebeclada</i> subsp. <i>chobiensis</i> Schreb.    | Fabales      | Fabaceae       | JX572199        | JX517672        |
| <i>Vachellia hebeclada</i> subsp. <i>hebeclada</i> DC.         | Fabales      | Fabaceae       | JX572200        | JX517617        |
| <i>Vachellia hebeclada</i> subsp. <i>tristis</i> A.Schreib.    | Fabales      | Fabaceae       | JX572201        | JX517346        |
| <i>Vachellia karroo</i> Hayne                                  | Fabales      | Fabaceae       | JX572203        | JX517490        |
| <i>Vachellia kirkii</i> Oliv.                                  | Fabales      | Fabaceae       | JX572204        | JX517387        |

|                                                                           |             |           |                 |                 |
|---------------------------------------------------------------------------|-------------|-----------|-----------------|-----------------|
| <i>Vachellia kosiensis</i> P.P.Sw.                                        | Fabales     | Fabaceae  | JX572205        | JX518109        |
| <i>Vachellia luederitzii</i> Engl.                                        | Fabales     | Fabaceae  | JX572207        | JX518240        |
| <i>Vachellia luederitzii</i> var. <i>retinens</i> (Sim) J. Ross & Brennan | Fabales     | Fabaceae  | JX572208        | JX517653        |
| <i>Vachellia montana</i> P.P.Sw.                                          | Fabales     | Fabaceae  | JX572231        | JX517894        |
| <i>Vachellia natalitia</i> E.Mey.                                         | Fabales     | Fabaceae  | JX572214        | JX517566        |
| <i>Vachellia nebrownii</i> Burt Davy                                      | Fabales     | Fabaceae  | JX572215        | JX517304        |
| <i>Vachellia nilotica</i> (L.) Delile                                     | Fabales     | Fabaceae  | JX572217        | JX517797        |
| <i>Vachellia ormocarpoides</i> P.J.H.Hurter                               | Fabales     | Fabaceae  | JX572218        | JX517884        |
| <i>Vachellia permixta</i> Burt Davy                                       | Fabales     | Fabaceae  | -               | GQ872240        |
| <i>Vachellia rehmanniana</i> Schinz                                       | Fabales     | Fabaceae  | JX572221        | JX517925        |
| <i>Vachellia robbertsei</i> P.P.Sw                                        | Fabales     | Fabaceae  | -               | GQ872244        |
| <i>Vachellia robusta</i> Burch.                                           | Fabales     | Fabaceae  | JX572223        | JX517736        |
| <i>Vachellia robusta</i> subsp. <i>clavigera</i> (E.Mey.) Brennan         | Fabales     | Fabaceae  | JF265249        | JF270606        |
| <i>Vachellia robusta</i> subsp. <i>usambarensis</i> (Taub.) Brennan       | Fabales     | Fabaceae  | JX572222        | JX517547        |
| <i>Vachellia sekhukhuniensis</i> P.J.H.Hurter                             | Fabales     | Fabaceae  | JX572226        | JX518234        |
| <i>Vachellia sieberiana</i> DC.                                           | Fabales     | Fabaceae  | JX572228        | JX517353        |
| <i>Vachellia sieberiana</i> var. <i>woodii</i> (Burt Davy) Keay & Brennan | Fabales     | Fabaceae  | JF265259        | JF270616        |
| <i>Vachellia stuhlmannii</i> Taub.                                        | Fabales     | Fabaceae  | JX572230        | JX517951        |
| <i>Vachellia swazica</i> Burt Davy                                        | Fabales     | Fabaceae  | JF265260        | JF270617        |
| <i>Vachellia torrei</i> Brennan                                           | Fabales     | Fabaceae  | JX572232        | JX518215        |
| <i>Vachellia tortilis</i> subsp. <i>heteracantha</i> (Burch.) Brennan     | Fabales     | Fabaceae  | JX572233        | JX517619        |
| <i>Vachellia xanthophloea</i> Benth.                                      | Fabales     | Fabaceae  | JX572235        | JX517302        |
| <i>Vangueria bowkeri</i> (Robyns) Lantz                                   | Gentianales | Rubiaceae | KF147526        | KF147450        |
| <i>Vangueria burnettii</i> (Tennant) Lantz                                | Gentianales | Rubiaceae | <b>KU568056</b> | <b>KX146279</b> |
| <i>Vangueria cinerascens</i> (Welw. ex Hiern) Lantz                       | Gentianales | Rubiaceae | <b>KU568167</b> | -               |
| <i>Vangueria cinerascens</i> var. <i>laeta</i> (Robyns) Lantz             | Gentianales | Rubiaceae | <b>KU568005</b> | -               |
| <i>Vangueria cinerascens</i> var. <i>laevior</i> (K.Schum.) Lantz         | Gentianales | Rubiaceae | <b>KU568017</b> | -               |
| <i>Vangueria coerulea</i> (Robyns) Lantz                                  | Gentianales | Rubiaceae | KF147500        | KF147425        |
| <i>Vangueria discolor</i> (De Wild.) Lantz                                | Gentianales | Rubiaceae | <b>KU568151</b> | <b>KX146366</b> |
| <i>Vangueria esculenta</i> S.Moore                                        | Gentianales | Rubiaceae | JX573075        | JX517807        |
| <i>Vangueria infausta</i> Burch.                                          | Gentianales | Rubiaceae | JX573076        | JX517485        |
| <i>Vangueria macrocalyx</i> Sond.                                         | Gentianales | Rubiaceae | -               | KF147426        |
| <i>Vangueria madagascariensis</i> J.F.Gmel.                               | Gentianales | Rubiaceae | JF265645        | JF270986        |
| <i>Vangueria parvifolia</i> Sond.                                         | Gentianales | Rubiaceae | JX573077        | JX517776        |
| <i>Vangueria randii</i> S.Moore                                           | Gentianales | Rubiaceae | JX573078        | JX517473        |
| <i>Vangueria randii</i> S.Moore subsp. <i>vollesenii</i> Verdc.           | Gentianales | Rubiaceae | <b>KU568157</b> | <b>KX146372</b> |
| <i>Vangueria thamnus</i> (Robyns) Lantz                                   | Gentianales | Rubiaceae | -               | KF147427        |
| <i>Vangueria venosa</i> (Hochst.) Sond.                                   | Gentianales | Rubiaceae | -               | KF147428        |
| <i>Vangueriopsis lanciflora</i> (Hiern) Robyns                            | Gentianales | Rubiaceae | KF147527        | -               |
| <i>Vepris bachmannii</i> (Engl.) Mziray                                   | Sapindales  | Rutaceae  | JX572808        | JX517461        |
| <i>Veris hremkamnii</i> (L. Verdc.) Mziray                                | Sapindales  | Rutaceae  | JF265630        | -               |

|                                                                     |              |                 |                 |                 |
|---------------------------------------------------------------------|--------------|-----------------|-----------------|-----------------|
| <i>Vepris benthamiana</i> (L. Verh.) Muel.                          | Sapindales   | Rutaceae        | JX573080        | -               |
| <i>Vepris carringtoniana</i> Mendonca                               | Sapindales   | Rutaceae        | <b>KU567994</b> | <b>KX146225</b> |
| <i>Vepris reflexa</i> Verd.                                         | Sapindales   | Rutaceae        | JX573080        | JX517574        |
| <i>Vepris soyauxii</i> (Engl.) Mziray                               | Sapindales   | Rutaceae        | KC628126        | KC627533        |
| <i>Vepris undulata</i> Verdoorn & C. A. Sm.                         | Sapindales   | Rutaceae        | JX573079        | JX517578        |
| <i>Vernonia natalensis</i> Sch.Bip. ex Walp.                        | Asterales    | Asteraceae      | KF147528        | KF147451        |
| <i>Virgilia divaricata</i> Adamson                                  | Fabales      | Fabaceae        | JX573081        | JX517500        |
| <i>Vismia orientalis</i> Engl.                                      | Malpighiales | Hypericaceae    | KF147529        | -               |
| <i>Vitellariopsis dispar</i> (N.E.Br.) Aubrév.                      | Ericales     | Sapotaceae      | JX573082        | JX518040        |
| <i>Vitex buchananii</i> Baker ex Gürke                              | Lamiales     | Lamiaceae       | JX573083        | JX517569        |
| <i>Vitex doniana</i> Sweet                                          | Lamiales     | Lamiaceae       | KF147530        | KF147452        |
| <i>Vitex ferruginea</i> Schumach. & Thonn.                          | Lamiales     | Lamiaceae       | JF265650        | JF270991        |
| <i>Vitex grandifolia</i> Gürke                                      | Lamiales     | Lamiaceae       | KC627954        | -               |
| <i>Vitex harveyana</i> H.Pearson                                    | Lamiales     | Lamiaceae       | JX573084        | JX518136        |
| <i>Vitex madiensis</i> subsp. <i>milanjiensis</i> (Britten) F.White | Lamiales     | Lamiaceae       | <b>KU568059</b> | <b>KX146282</b> |
| <i>Vitex mombassae</i> Vatke                                        | Lamiales     | Lamiaceae       | <b>KU568036</b> | <b>KX146261</b> |
| <i>Vitex patula</i> E.A.Bruce                                       | Lamiales     | Lamiaceae       | JX573085        | JX517538        |
| <i>Vitex payos</i> (Lour.) Merr.                                    | Lamiales     | Lamiaceae       | JX573086        | JX518012        |
| <i>Vitex petersiana</i> Klotzsch                                    | Lamiales     | Lamiaceae       | JX573087        | JX517600        |
| <i>Vitex rehmannii</i> Gürke                                        | Lamiales     | Lamiaceae       | JX573088        | JX517958        |
| <i>Vitex zeyheri</i> Sond. ex Schauer                               | Lamiales     | Lamiaceae       | <b>KU568127</b> | <b>KX146344</b> |
| <i>Vitis rhomboidea</i> (E. Mey. ex Harv.) Szyszyl.                 | Vitales      | Vitaceae        | JX572927        | JX518114        |
| <i>Voacanga africana</i> Stapf ex Scott-Elliot                      | Gentianales  | Apocynaceae     | JX573089        | JX905951        |
| <i>Voacanga psilocalyx</i> Pierre ex Stapf                          | Gentianales  | Apocynaceae     | KC628529        | KC627835        |
| <i>Voacanga thouarsii</i> Roem. & Schult.                           | Gentianales  | Apocynaceae     | JX573090        | JX517507        |
| <i>Warburgia salutaris</i> (G.Bertol.) Chiov.                       | Canellales   | Canellaceae     | JF265653        | JF270994        |
| <i>Warneckea jasminoides</i> (Gilg) Jacq.-Fél.                      | Myrtales     | Melastomataceae | KC628164        | KC627560        |
| <i>Warneckea membranifolia</i> (Hook.f.) Jacq.-Fél.                 | Myrtales     | Melastomataceae | KC628462        | KC627791        |
| <i>Warneckea pulcherrima</i> (Gilg) Jacq.-Fél.                      | Myrtales     | Melastomataceae | KC628209        | KC627600        |
| <i>Warneckea sapinii</i> (De Wild.) Jacq.-Fél.                      | Myrtales     | Melastomataceae | <b>KU568143</b> | <b>KX146358</b> |
| <i>Widdringtonia nodiflora</i> (L.) E.Powrie                        | Pinales      | Cupressaceae    | AY988266        | AY988364        |
| <i>Widdringtonia schwarzii</i> (Marloth) Mast.                      | Pinales      | Cupressaceae    | -               | AF152218        |
| <i>Wrightia natalensis</i> Stapf                                    | Gentianales  | Apocynaceae     | JX573091        | JX517947        |
| <i>Xanthocercis zambesiaca</i> (Baker) Dumaz-le-Grand               | Fabales      | Fabaceae        | JX573092        | JX517427        |
| <i>Xeroderris stuhlmannii</i> (Taub.) Mendonca & Sousa              | Fabales      | Fabaceae        | JX573093        | JX517470        |
| <i>Xerophyta retinervis</i> Baker                                   | Pandanales   | Velloziaceae    | JQ025106        | JQ025013        |
| <i>Ximenia americana</i> L.                                         | Santalales   | Olacaceae       | JX573094        | JX517654        |
| <i>Ximenia caffra</i> Sond.                                         | Santalales   | Olacaceae       | JX573095        | JX518138        |
| <i>Xylia mendoncae</i> Torre                                        | Fabales      | Fabaceae        | <b>KU568161</b> | <b>KX146376</b> |
| <i>Xylia torreana</i> Brenan                                        | Fabales      | Fabaceae        | JX573096        | JX518118        |
| <i>Xylocarpus moluccensis</i> (Lam.) M.Roem.                        | Sapindales   | Meliaceae       | <b>KU568154</b> | <b>KX146369</b> |
| <i>Xylopia acutiflora</i> (Dunal) A.Rich.                           | Magnoliales  | Annonaceae      | KC628519        | KC627829        |

|                                                     |              |             |                 |                 |
|-----------------------------------------------------|--------------|-------------|-----------------|-----------------|
| <i>Xylopia aethiopica</i> (Dunal) A.Rich.           | Magnoliales  | Annonaceae  | KC628042        | KC627474        |
| <i>Xylopia collina</i> Diels                        | Magnoliales  | Annonaceae  | <b>KU568024</b> | <b>KX146248</b> |
| <i>Xylopia parviflora</i> Spruce                    | Magnoliales  | Annonaceae  | JF265661        | JF271002        |
| <i>Xylopia tomentosa</i> Exell                      | Magnoliales  | Annonaceae  | <b>KU568113</b> | <b>KX146332</b> |
| <i>Xylopia torrei</i> N.Robson                      | Magnoliales  | Annonaceae  | <b>KU568060</b> | <b>KX146283</b> |
| <i>Xylothea kraussiana</i> Hochst.                  | Malpighiales | Salicaceae  | JX573097        | JX517892        |
| <i>Xylothea tettensis</i> (Klotzsch) Gilg           | Malpighiales | Salicaceae  | JX573098        | JX517814        |
| <i>Xymalos monospora</i> (Harv.) Baill.             | Lurales      | Monimiaceae | JX573099        | JX517511        |
| <i>Zanha africana</i> (Radlk.) Exell                | Sapindales   | Sapindaceae | <b>KU568052</b> | -               |
| <i>Zanha golungensis</i> Hiern                      | Sapindales   | Sapindaceae | <b>KU568130</b> | <b>KX146345</b> |
| <i>Zanthoxylum capense</i> (Thunb.) Harv.           | Sapindales   | Rutaceae    | JX573100        | JX517645        |
| <i>Zanthoxylum davyi</i> Waterm.                    | Sapindales   | Rutaceae    | JX573101        | JX517950        |
| <i>Zanthoxylum delagoense</i> P.G.Waterman          | Sapindales   | Rutaceae    | <b>KU568107</b> | <b>KX146326</b> |
| <i>Zanthoxylum gilletii</i> (De Wild.) P.G.Waterman | Sapindales   | Rutaceae    | KC628014        | KC627459        |
| <i>Zanthoxylum holtzianum</i> (Engl.) P.G. Waterman | Sapindales   | Rutaceae    | JX573102        | JX518057        |
| <i>Zanthoxylum humile</i> Waterm.                   | Sapindales   | Rutaceae    | JX573103        | JX517824        |
| <i>Zanthoxylum lepreurii</i> Guill. & Perr.         | Sapindales   | Rutaceae    | JX573104        | JX517932        |
| <i>Ziziphus abyssinica</i> Hochst. ex A.Rich.       | Rosales      | Rhamnaceae  | JX573105        | JX517646        |
| <i>Ziziphus mucronata</i> Willd.                    | Rosales      | Rhamnaceae  | JX573107        | JX518049        |
| <i>Ziziphus pubescens</i> Oliv.                     | Rosales      | Rhamnaceae  | JX573108        | JX517471        |
| <i>Ziziphus rivularis</i> Codd                      | Rosales      | Rhamnaceae  | JX573109        | JX518212        |
| <i>Ziziphus zeyheriana</i> Sond.                    | Rosales      | Rhamnaceae  | KF147531        | KF147453        |

---
